# Supplementary material for: Synthesis of blue emissive functionalized 9,9-disubstituted fluorene derivatives via BF3·OEt2 mediated reaction of co-planar 9-(phenylethynyl)-9H-fluoren-9-ols with isatin imines
Source: Royal Society of Chemistry journal article supplement (doi:10.1039/c9nj05102c), 2020-01-01
Supplement: c9nj05102c1.pdf [file c9nj05102c1.pdf]

**Synthesis of blue emissive functionalized 9,9-disubstituted fluorene derivatives via  $\text{BF}_3 \cdot \text{OEt}_2$  mediated reaction of co-planar 9-(phenylethynyl)-9H-fluorene-9-ols with isatin imines**

**Mohanakumaran Athira, Ramakrishnan Suseela Meerakrishna, and Ponnusamy Shanmugam\***

Organic and Bioorganic Chemistry Division, Council of Scientific and Industrial Research (CSIR)-Central Leather Research Institute (CLRI), Adyar, Chennai-600020, India; Fax: (+) 91-44-24911589; Phone: (+91)-44-24437130; E-mail: [shanmu196@rediffmail.com](mailto:shanmu196@rediffmail.com)

**Content**

1. Scanned copies of spectra ( $^1\text{H}$  and  $^{13}\text{C}$ , DEPT-135 NMR, HRMS)
2. Basic crystallographic data for compound **3a** and **4b**

# 1. Scanned copies of spectra (<sup>1</sup>H and <sup>13</sup>C, DEPT-135 NMR, HRMS)

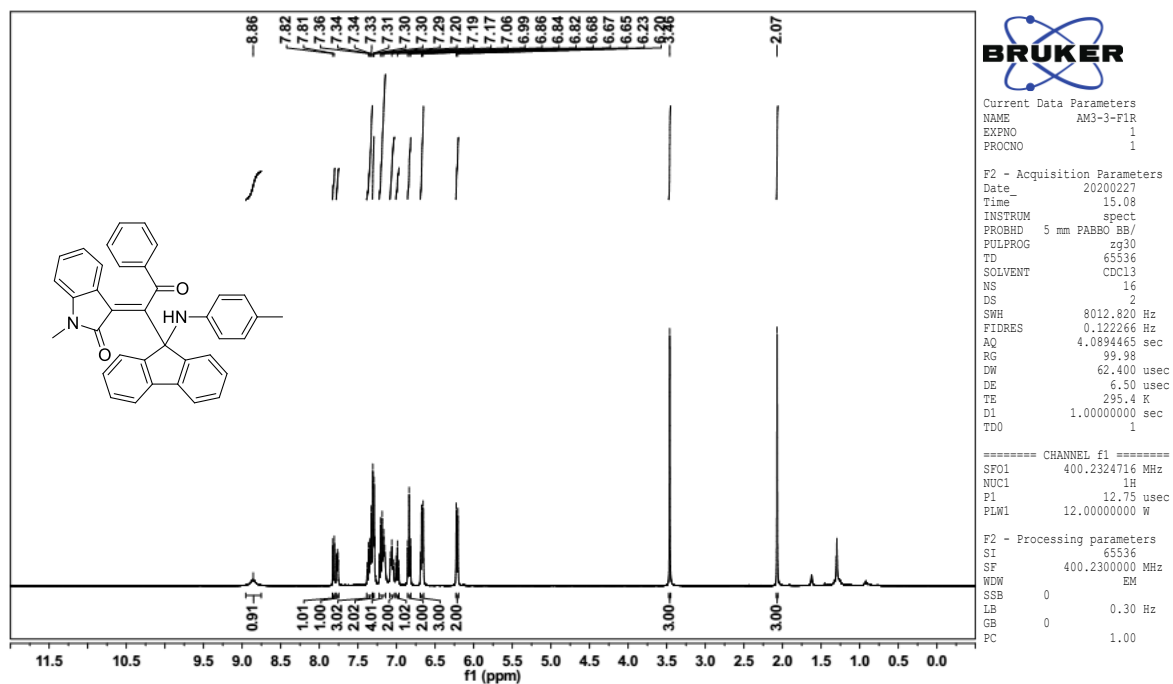

<sup>1</sup>H NMR spectrum of compound 3a

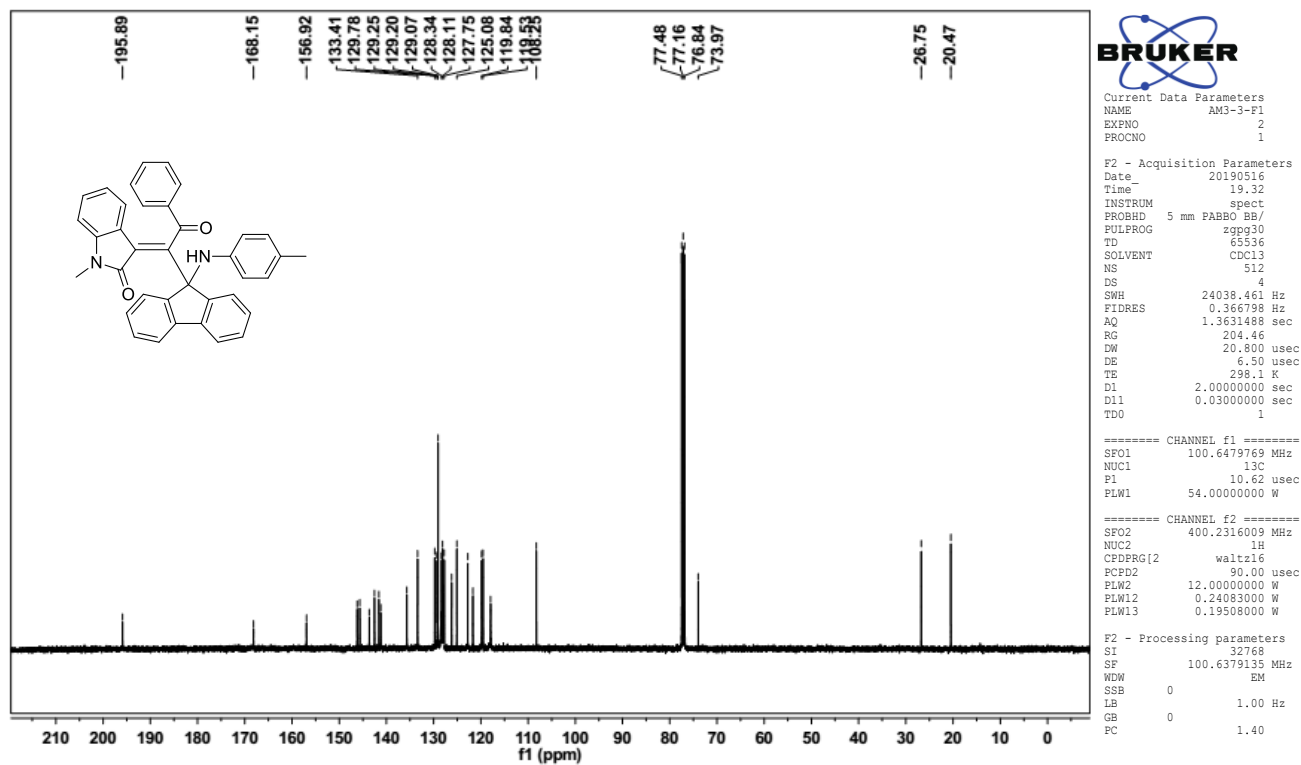

<sup>13</sup>C NMR Spectrum of compound 3a

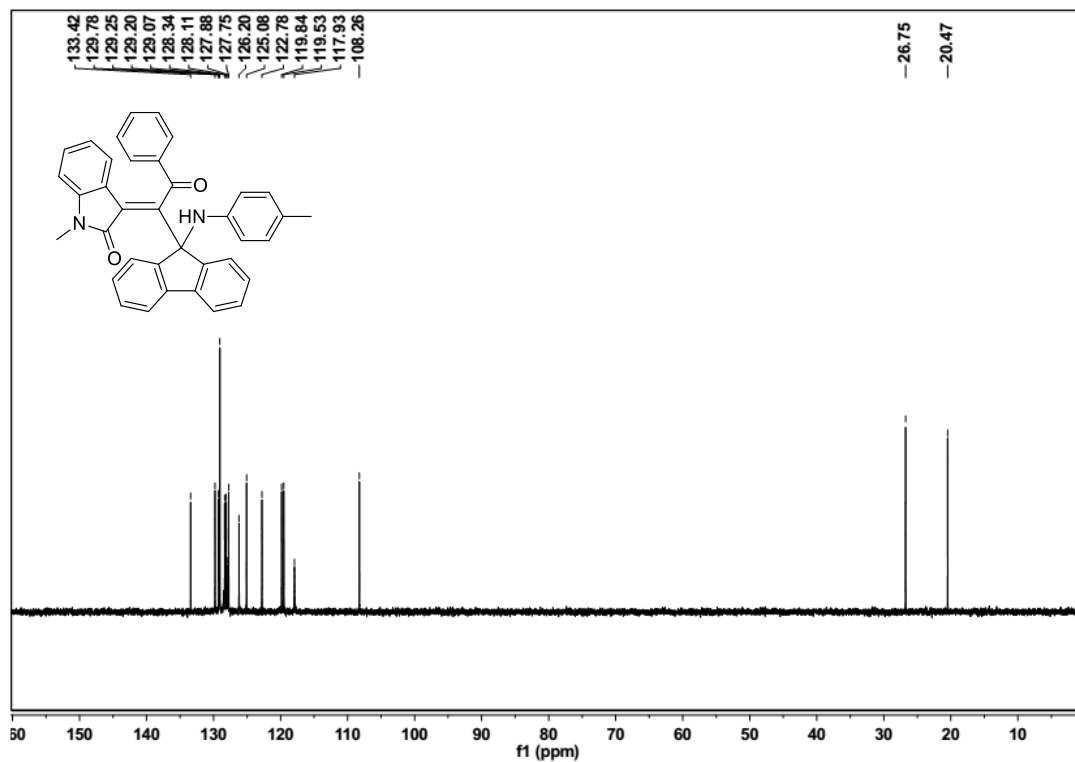

DEPT- 135 Spectrum of compound 3a

AM3-3F1 #67 RT: 1.18 AV: 1 NL: 2.22E7  
T: FTMS (1,1) + p ESI Full ms [100.00-1500.00]

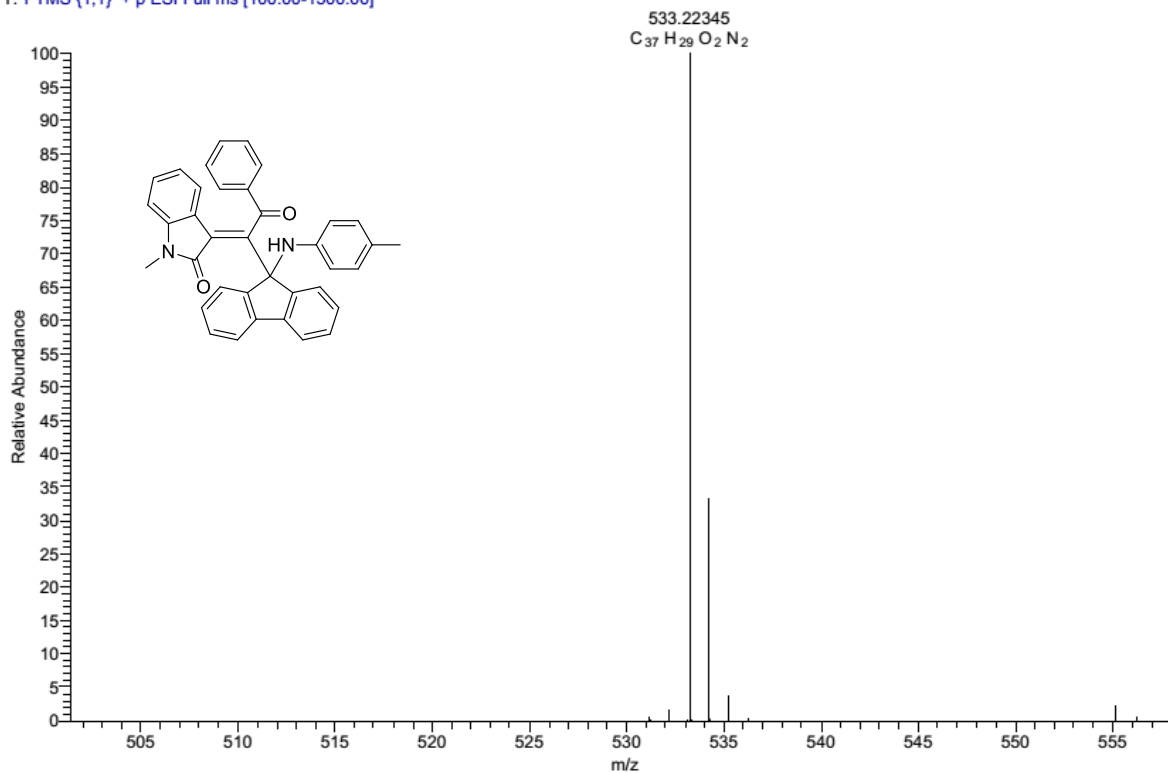

HRMS Spectrum of Compound 3a

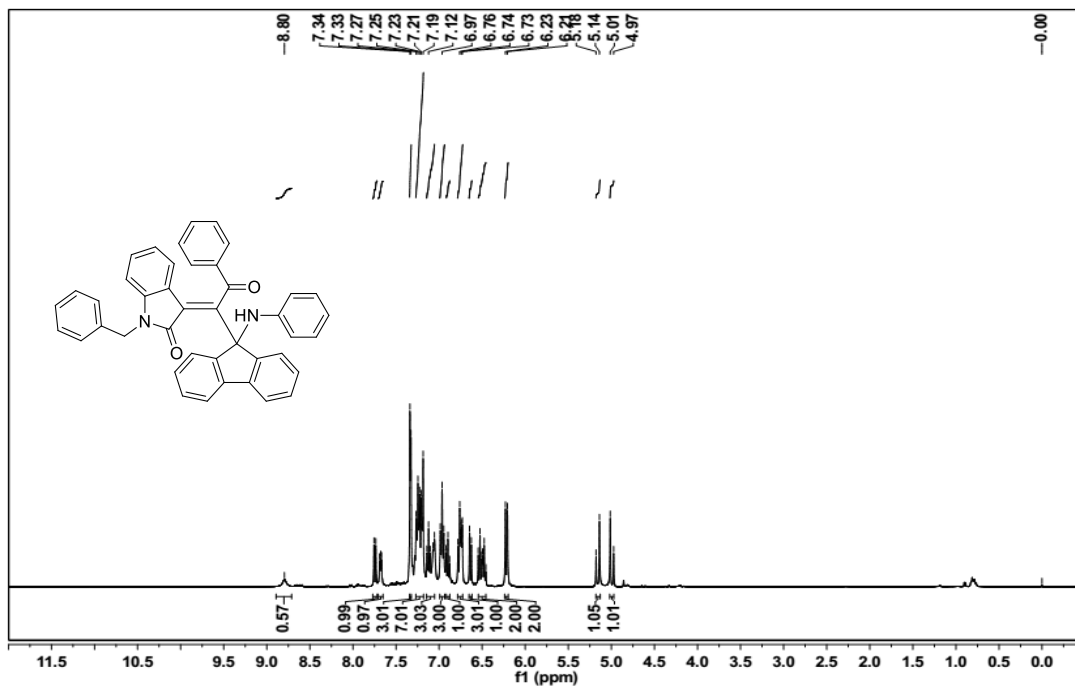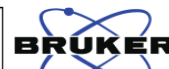

```

Current Data Parameters
NAME      AL3216FIR2
EXPNO    2
PROCNO   1

F2 - Acquisition Parameters
Date_    20200305
Time     13.50
INSTRUM  spect
PROBHD   5 mm PABBO BB/
PULPROG  zgpg30
TD       29898
SOLVENT  CDCl3
NS       32
DS       2
SWH      10000.000 Hz
FIDRES   0.33356 Hz
AQ       1.4999000 sec
RG       204.46
DW       50.000 usec
DE       6.50 usec
TE       298.3 K
D1       1.0000000 sec
D12      0.0000200 sec
D16      0.0002000 sec
TDO      1

===== CHANNEL f1 =====
SFO1     400.2306322 MHz
NUC1     1H
P1       11.17 usec
P2       22.34 usec
P12      2000.00 usec
PLW0     0 W
PLW1     12.0000000 W
SPNAM[1] Squa100.1000
SFO1[1]  0.500
SPOFFS1  0 Hz
SBW1     0.00144630 W

===== GRADIENT CHANNEL =====
GPNAM[1] SMSQ10.100
GPNAM[2] SMSQ10.100
GB21     31.00 %
GR22     11.00 %
P16      1000.00 usec

F2 - Processing parameters
SI       32768
SF       400.2300000 MHz
WDW      EM
SSB      0
LB       1.00 Hz
GB       0
PC       1.00
  
```

<sup>1</sup>H NMR spectrum of compound 3b

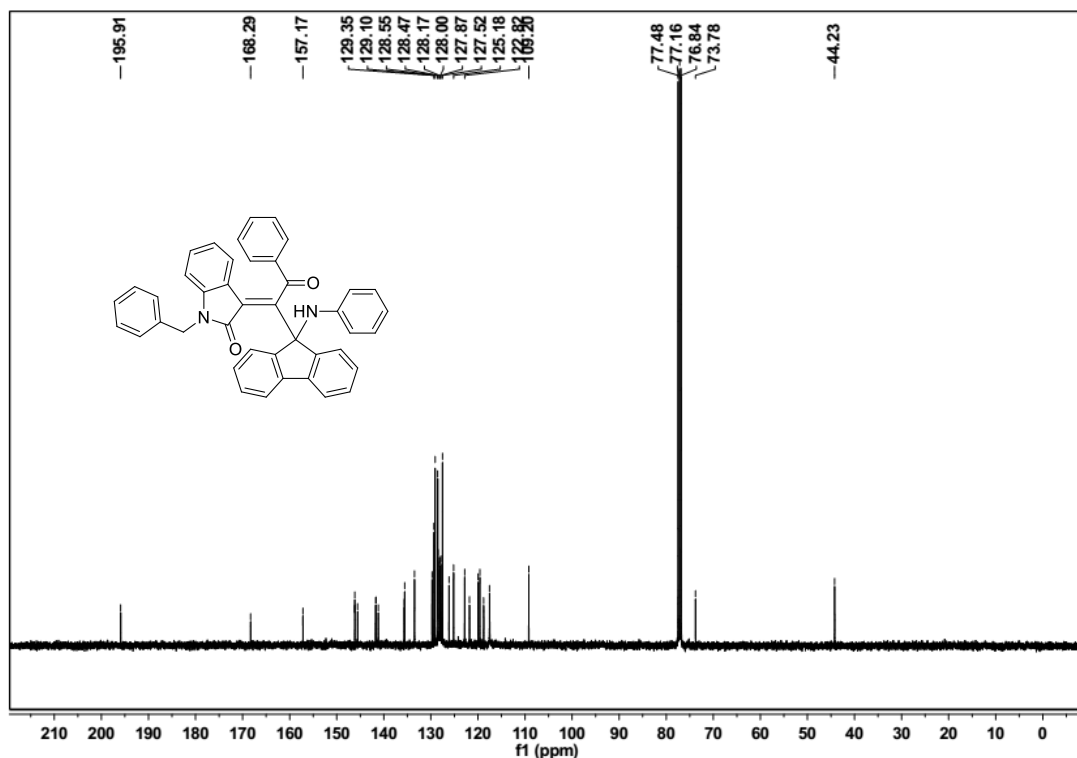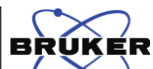

```

Current Data Parameters
NAME      AMII-216
EXPNO    2
PROCNO   1

F2 - Acquisition Parameters
Date_    20190415
Time     10.21
INSTRUM  spect
PROBHD   5 mm PABBO BB/
PULPROG  zgpg30
TD       65536
SOLVENT  CDCl3
NS       512
DS       4
SWH      24038.461 Hz
FIDRES   0.366798 Hz
AQ       1.3631488 sec
RG       204.46
DW       20.800 usec
DE       6.50 usec
TE       298.7 K
D1       2.0000000 sec
D11      0.03000000 sec
TDO      1

===== CHANNEL f1 =====
SFO1     100.6479769 MHz
NUC1     13C
P1       10.62 usec
PLW1     54.00000000 W

===== CHANNEL f2 =====
SFO2     400.2316009 MHz
NUC2     1H
CPDPRG[2] waltz16
PCPD2   90.00 usec
PLW2     12.00000000 W
PLW12    0.24083000 W
PLW13    0.19508000 W

F2 - Processing parameters
SI       32768
SF       100.6379135 MHz
WDW      EM
SSB      0
LB       1.00 Hz
GB       0
PC       1.40
  
```

<sup>13</sup>C NMR Spectrum of compound 3b

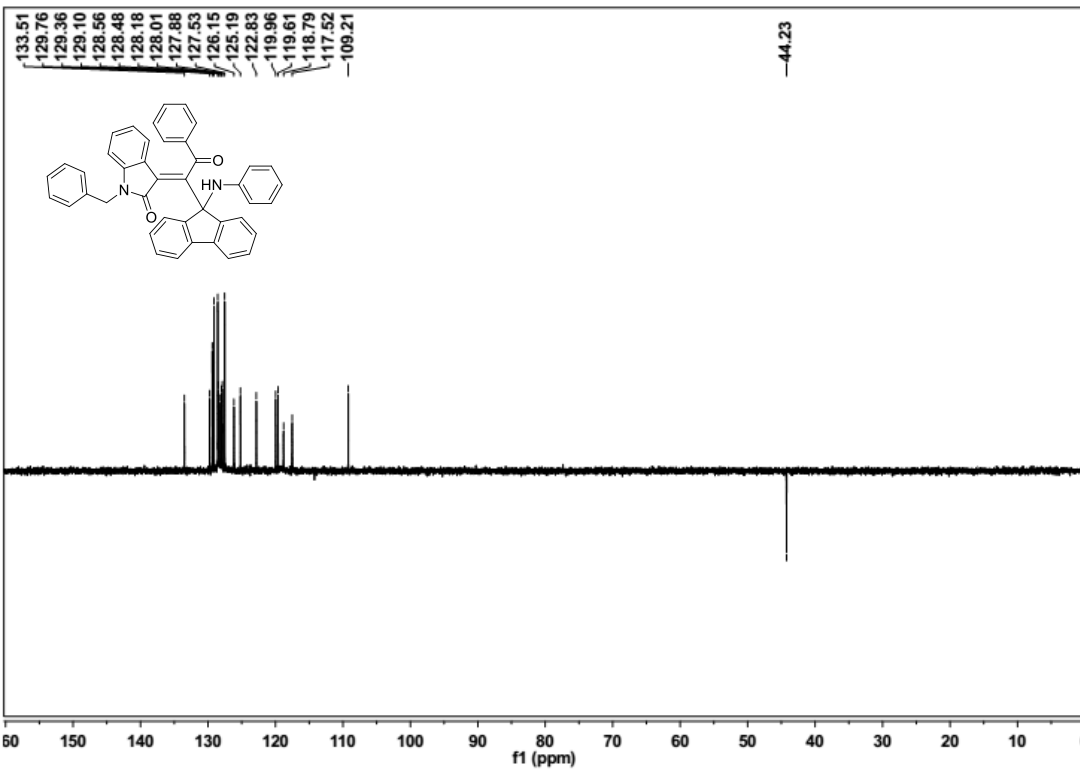

**BRUKER**

Current Data Parameters  
 NAME AMI-216  
 EXPNO 3  
 PROCNO 1

F2 - Acquisition Parameters  
 Date\_ 20190415  
 Time 10.40  
 INSTRUM spect  
 PROBHD 5 mm PABBO BB/  
 PULPROG zgpg30  
 TD 65536  
 SOLVENT CDCl3  
 NS 256  
 DS 4  
 SWH 16129.032 Hz  
 FIDRES 0.246110 Hz  
 AQ 2.0316160 sec  
 RG 204.46  
 DW 31.000 usec  
 DE 6.50 usec  
 TE 298.3 K  
 CNU2 145.000000 sec  
 D1 2.00000000 sec  
 D2 0.00344828 sec  
 D12 0.00002000 sec  
 TDD 1

----- CHANNEL f1 -----  
 SFO1 100.6459641 Mhz  
 NUC1 13C  
 P1 10.62 usec  
 P13 2000.00 usec  
 PLW0 0 W  
 PLW1 54.0000000 W  
 SFOAL5 Crp600comp-4  
 SFOAL5 0.500  
 SPOFFS5 0 Hz  
 SEWS 9.30539989 W

----- CHANNEL f2 -----  
 SFO2 400.2512800 Mhz  
 NUC2 1H  
 CPDPRG2 waltz16  
 P3 12.75 usec  
 P4 25.50 usec  
 PCPD2 90.00 usec  
 PLW2 12.0000000 W  
 PLW12 0.24083000 W

F2 - Processing parameters  
 SI 32768  
 SF 100.6379135 Mhz  
 WDW EM  
 SSB 0  
 LB 1.00 Hz  
 GB 0  
 PC 1.40

DEPT- 135 Spectrum of compound 3b

**Single Mass Analysis**  
 Tolerance = 5.0 mDa / DBE min = -1.5, max = 50.0  
 Element prediction: Off  
 Number of isotope peaks used for i-FIT = 3  
 Monoisotopic Mass, Odd and Even Electron Ions  
 829 formula(e) evaluated with 1 results within limits (up to 50 best isotopic matches for each mass)  
 Elements Used:

| Mass     | Calc. Mass | mDa | PPM | DBE  | Formula       | i-FIT | i-FIT Norm | Fit Conf % | C  | H  | N | O |
|----------|------------|-----|-----|------|---------------|-------|------------|------------|----|----|---|---|
| 595.2413 | 595.2386   | 2.7 | 4.5 | 28.5 | C42 H31 N2 O2 | 1381  | n/a        | n/a        | 42 | 31 | 2 | 2 |

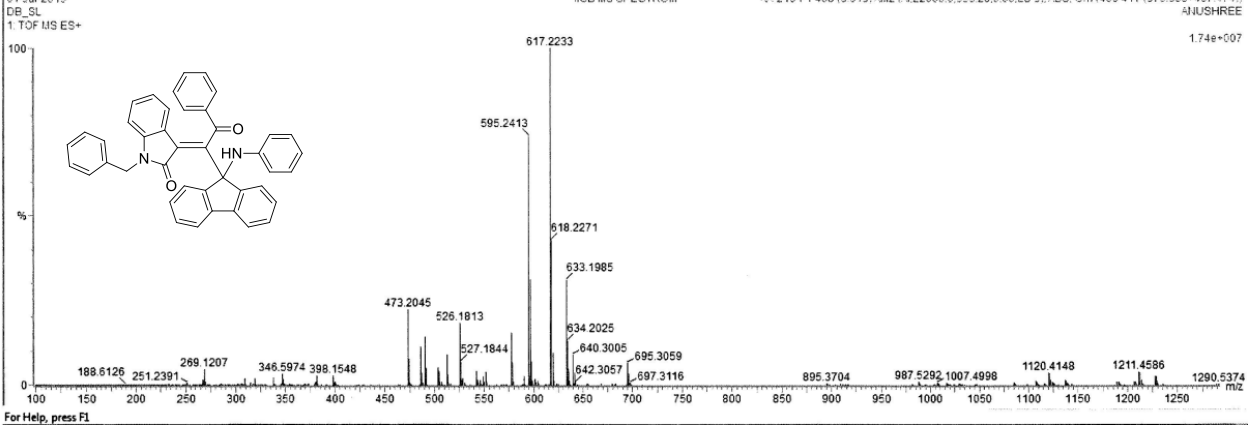

HRMS Spectrum of Compound 3b

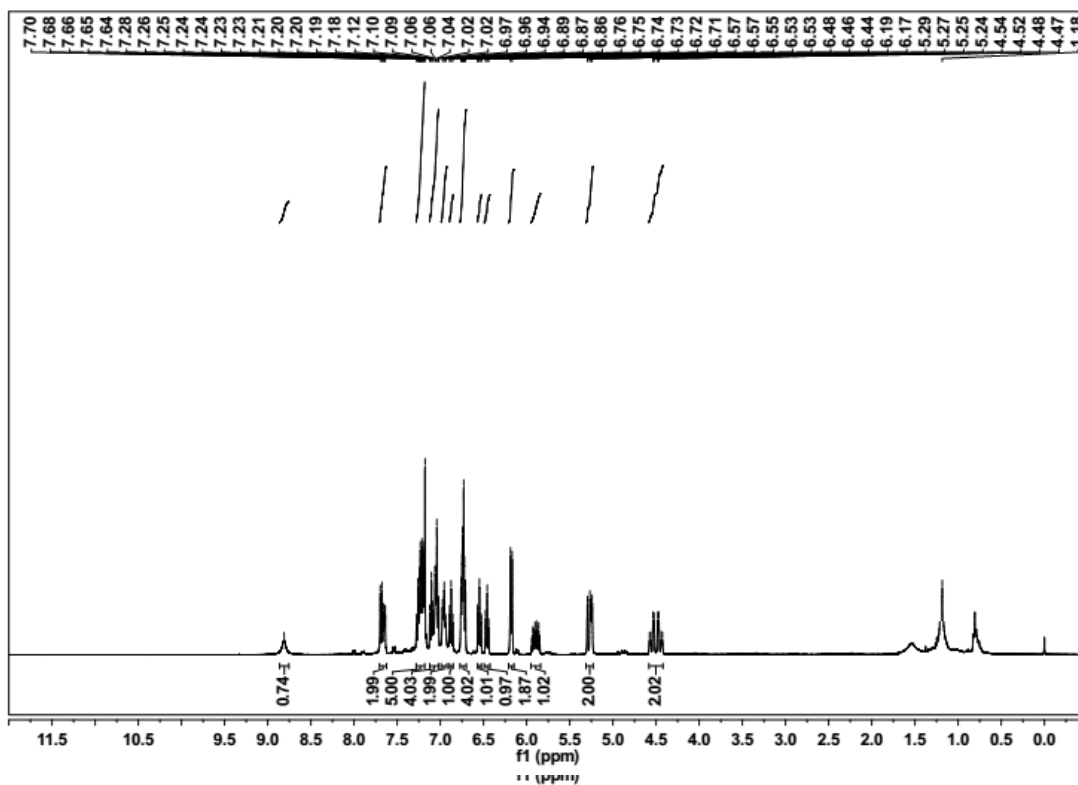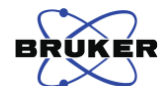

```

Current Data Parameters
NAME      AMII-244F1
XPNO     1
PROCNO   1

2 - Acquisition Parameters
Date_    20190430
Time     6.42
INSTRUM  spect
PROBHD   5 mm PABBO BB/
PULPROG  zg30
ID       65536
SOLVENT  CDCl3
NS       16
DS       2
AQ       8012.820 Hz
FIDRES   0.122266 Hz
AQ       4.0894465 sec
RG       89.69
WDW      62.400 usec
SSB      6.50 usec
GB       296.2 K
PC       1.00000000 sec
DO       1

===== CHANNEL f1 =====
F01      400.2324716 MHz
UC1      1H
NUC1     12.75 usec
===== CHANNEL f2 =====
F02      400.2300418 MHz
UC2      13C
===== CHANNEL f3 =====
F03      100.6279769 MHz
UC3      13C
===== CHANNEL f4 =====
F04      100.6279769 MHz
UC4      13C
===== CHANNEL f5 =====
F05      100.6279769 MHz
UC5      13C
===== CHANNEL f6 =====
F06      100.6279769 MHz
UC6      13C

2 - Processing parameters
SI       65536
SF       400.2300418 MHz
WDW      EM
SSB      0
GB       0.30 Hz
PC       1.00

```

<sup>1</sup>H NMR spectrum of compound 3c

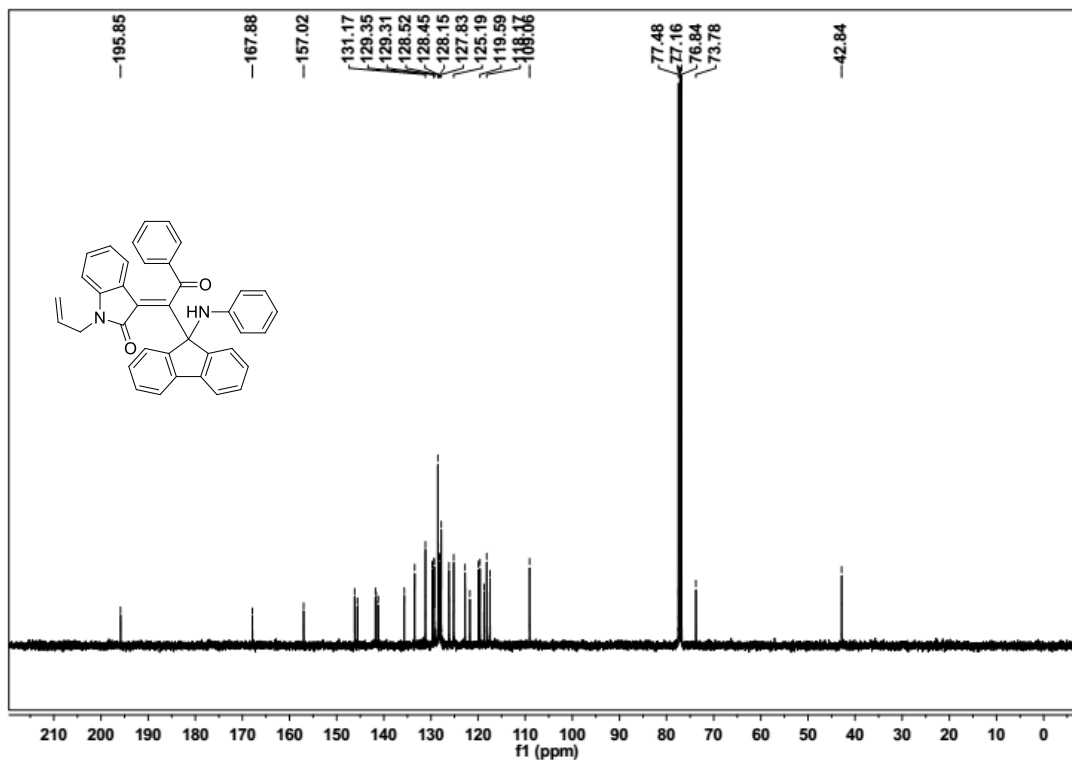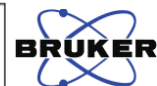

```

Current Data Parameters
NAME      AMII-244F1
XPNO     2
PROCNO   1

2 - Acquisition Parameters
Date_    20190430
Time     7.12
INSTRUM  spect
PROBHD   5 mm PABBO BB/
PULPROG  zgpg30
ID       65536
SOLVENT  CDCl3
NS       512
DS       4
AQ       24039.461 Hz
FIDRES   0.366798 Hz
AQ       1.3631488 sec
RG       204.46
WDW      20.800 usec
SSB      6.50 usec
GB       298.2 K
PC       2.00000000 sec
DO       0.03000000 sec

===== CHANNEL f1 =====
F01      100.6279769 MHz
UC1      13C
===== CHANNEL f2 =====
F02      400.2316009 MHz
UC2      1H
===== CHANNEL f3 =====
F03      100.6279769 MHz
UC3      13C
===== CHANNEL f4 =====
F04      100.6279769 MHz
UC4      13C
===== CHANNEL f5 =====
F05      100.6279769 MHz
UC5      13C
===== CHANNEL f6 =====
F06      100.6279769 MHz
UC6      13C

2 - Processing parameters
SI       32768
SF       100.6279769 MHz
WDW      EM
SSB      0
GB       1.00 Hz
PC       1.40

```

<sup>13</sup>C NMR Spectrum of compound 3c

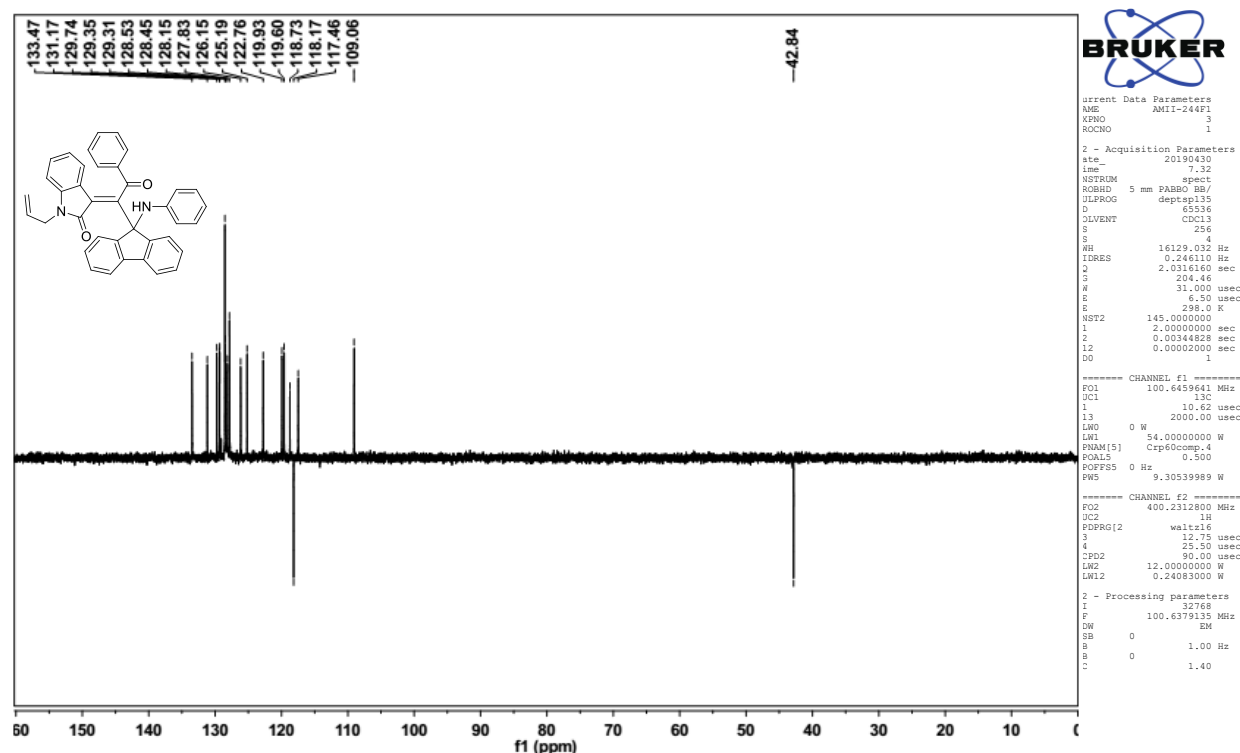

DEPT- 135 Spectrum of compound 3c

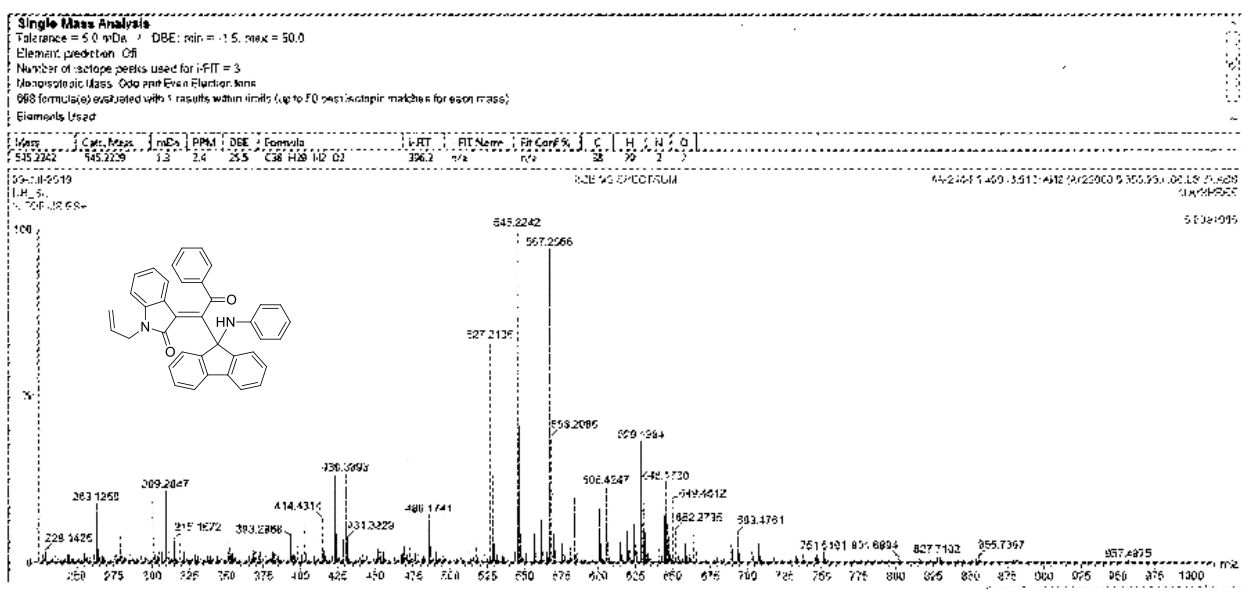

HRMS Spectrum of Compound 3c

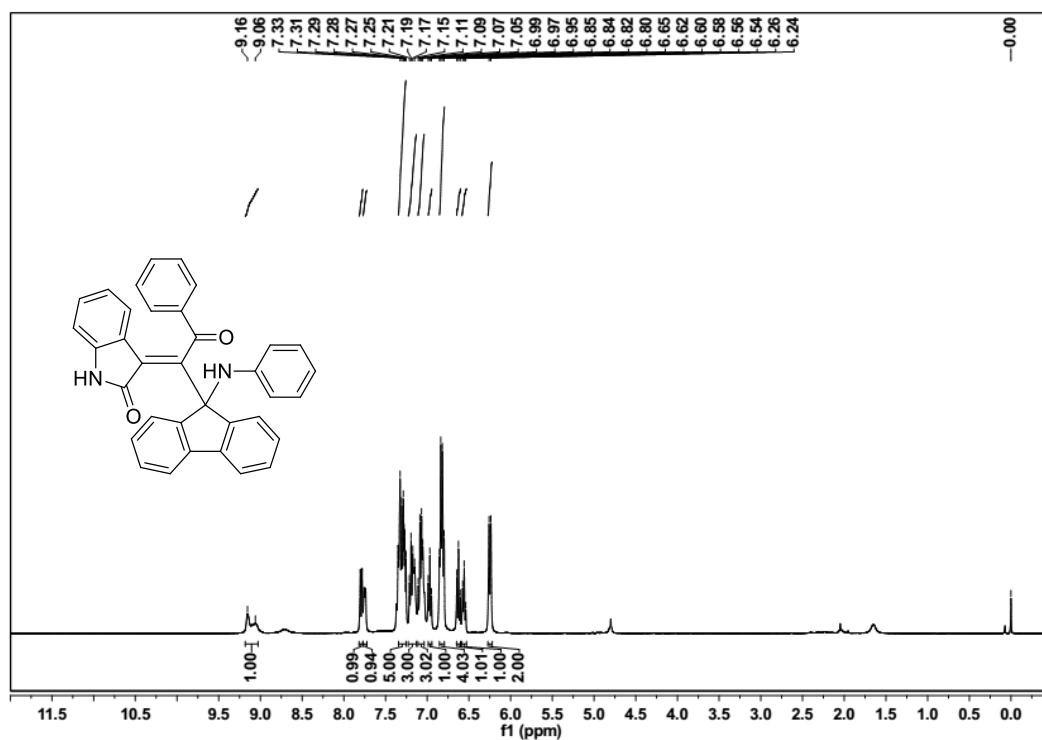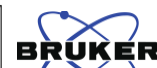

```

Current Data Parameters
NAME      AM2240E2
EXPNO    4
PROCNO   1

F2 - Acquisition Parameters
Date_    20200313
Time     7.29
INSTRUM  spect
PROBHD   5 mm PABBO BB/
PULPROG  zgpg30
TD       2998
SOLVENT  CDCl3
NS       64
DS       2
SWH      10000.000 Hz
FIDRES   0.333356 Hz
AQ       1.489000 sec
RG       204.46
DW       50.000 usec
DE       6.50 usec
TE       297.2 K
D1       1.00000000 sec
D12      0.00000000 sec
D16      0.00020000 sec
TDO      1

===== CHANNEL f1 =====
SFO1     400.2306625 MHz
NUC1     1H
P1       11.17 usec
P2       22.34 usec
P12      2000.00 usec
PLW0     0 W
PLW1     12.00000000 W
SFO1M1   Sma100.1000
SFO1M1   0.500
SFO1M1   1000.00 usec

===== GRADIENT CHANNEL =====
GPNAM[1] SMSQ10.100
GPNAM[2] SMSQ10.100
GFZ1     31.00 %
GFZ2     11.00 %
F16      1000.00 usec

F2 - Processing parameters
SI       32768
SF       400.2300000 MHz
WDW      EM
SSB      0
LB       0.20 Hz
GB       0
PC       1.00
  
```

<sup>1</sup>H NMR spectrum of compound 3d

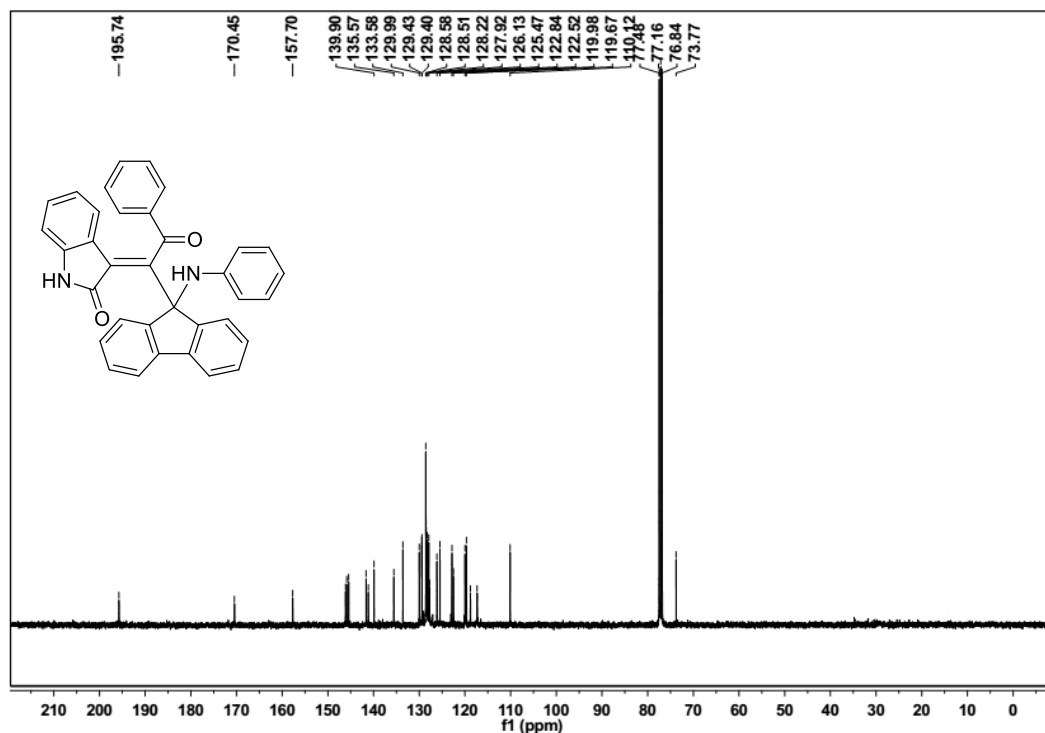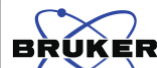

```

Current Data Parameters
NAME      AMII-240-F1R
EXPNO    2
PROCNO   1

F2 - Acquisition Parameters
Date_    20190814
Time     17.59
INSTRUM  spect
PROBHD   5 mm PABBO BB/
PULPROG  zgpg30
TD       65536
SOLVENT  CDCl3
NS       1024
DS       4
SWH      24038.461 Hz
FIDRES   0.366798 Hz
AQ       1.3631488 sec
RG       204.46
DW       20.800 usec
DE       6.50 usec
TE       297.7 K
D1       2.00000000 sec
D11      0.03000000 sec
TDO      1

===== CHANNEL f1 =====
SFO1     100.6479769 MHz
NUC1     13C
P1       10.62 usec
PLW1     54.00000000 W

===== CHANNEL f2 =====
SFO2     400.2316009 MHz
NUC2     1H
CPDPRG2  waltz16
PCPD2    90.00 usec
PLW2     12.00000000 W
PLM12    0.24080000 W
PLM13    0.19508000 W

F2 - Processing parameters
SI       32768
SF       100.6375135 MHz
WDW      EM
SSB      0
LB       1.00 Hz
GB       0
PC       1.40
  
```

<sup>13</sup>C NMR spectrum of compound 3d



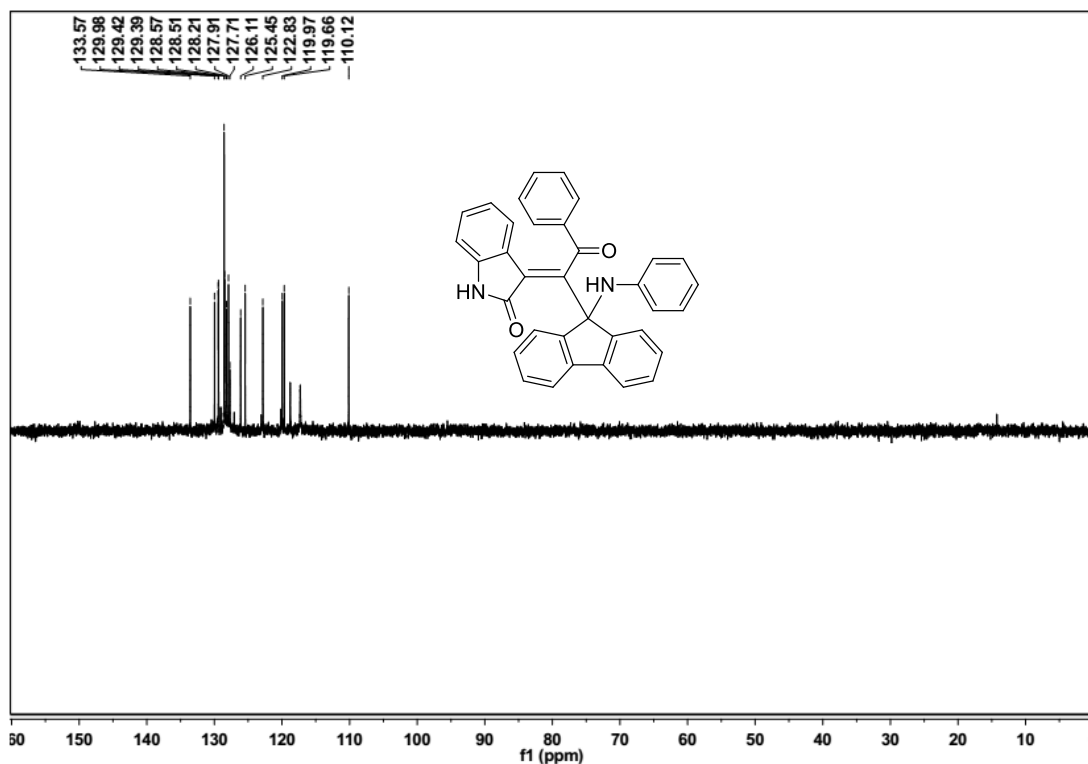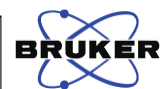

Current Data Parameters  
 NAME AMI1-240-F1a  
 EXPNO 3  
 PROCNO 1

F2 - Acquisition Parameters  
 Date\_ 20190814  
 Time 18.18  
 INSTRUM spect  
 PROBHD 5 mm PABBO BB/  
 PULPROG deptspl35  
 TD 65536  
 SOLVENT CDCl3  
 NS 256  
 DS 4  
 SWH 16129.032 Hz  
 FIDRES 0.246110 Hz  
 AQ 2.0316160 sec  
 RG 204.46  
 DW 31.000 usec  
 DE 6.50 usec  
 TE 297.0 K  
 CNST2 145.000000  
 D1 2.0000000 sec  
 D2 0.0034428 sec  
 D12 0.00002000 sec  
 TDO 1

CHANNEL f1 -----  
 SFO1 100.6459641 MHz  
 NUC1 13C  
 P1 10.62 usec  
 P13 2000.00 usec  
 PLW0 0 W  
 PLW1 54.0000000 W  
 SFOAL5 Crp60comp:4  
 SFOALS 0.500  
 SPOFFS5 0 Hz  
 SFW5 9.30539989 W

CHANNEL f2 -----  
 SFO2 400.2312800 MHz  
 NUC2 1H  
 CPDPRG2 waltz16  
 P3 32.75 usec  
 P4 25.50 usec  
 PCPD2 90.00 usec  
 PLW2 12.0000000 W  
 PLW12 0.24083000 W

F2 - Processing parameters  
 SI 32768  
 SF 100.6379135 MHz  
 WDW EM  
 SSB 0  
 LB 1.00 Hz  
 GB 0  
 PC 1.40

DEPT- 135 Spectrum of compound 3d

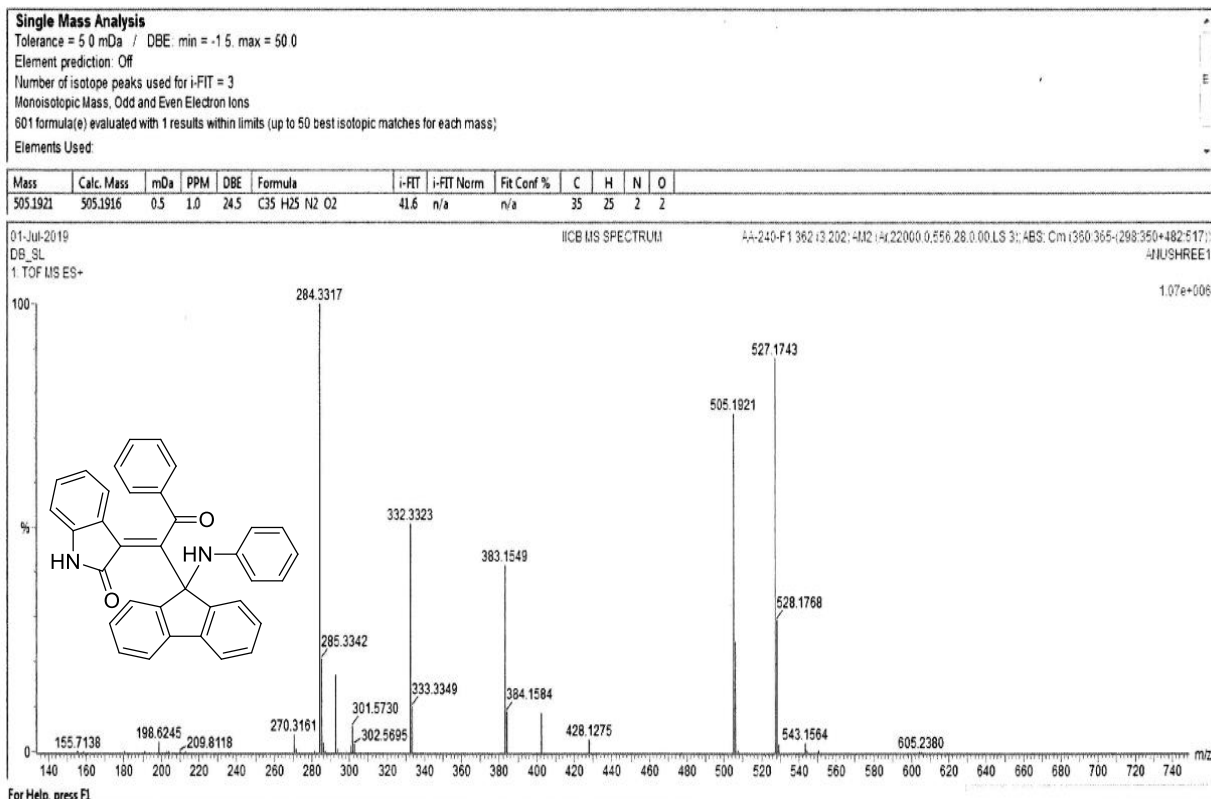

HRMS Spectrum of Compound 3d

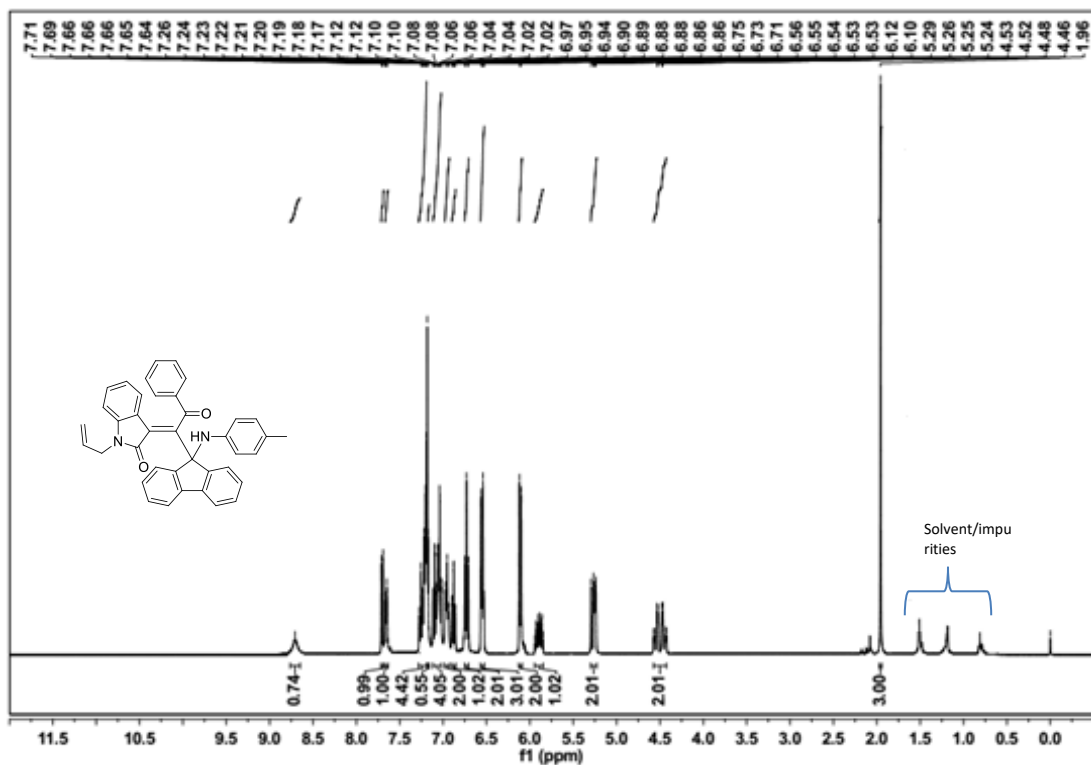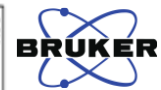

Current Data Parameters  
 NAME AM-6-F1  
 EXPNO 1  
 PROCNO 1

F2 - Acquisition Parameters  
 Date\_ 20190521  
 Time\_ 20.19  
 INSTRUM spect  
 PROBHD 5 mm PABBO BB/  
 PULPROG zg30  
 TD 65536  
 SOLVENT CDCl3  
 NS 16  
 DS 2  
 SWH 8012.820 Hz  
 FIDRES 0.122266 Hz  
 AQ 4.0894465 sec  
 RG 114.23  
 DW 62.400 usec  
 DE 6.50 usec  
 TE 296.4 K  
 D1 1.00000000 sec  
 TDO 1

==== CHANNEL f1 =====  
 SFO1 400.2324716 MHz  
 NUC1 1H  
 P1 12.75 usec  
 PLW1 12.00000000 W

F2 - Processing parameters  
 SI 65536  
 SF 400.2300407 MHz  
 WDW EM  
 SSB 0  
 LB 0.30 Hz  
 GB 0  
 PC 1.00

<sup>1</sup>H NMR spectrum of compound 3e

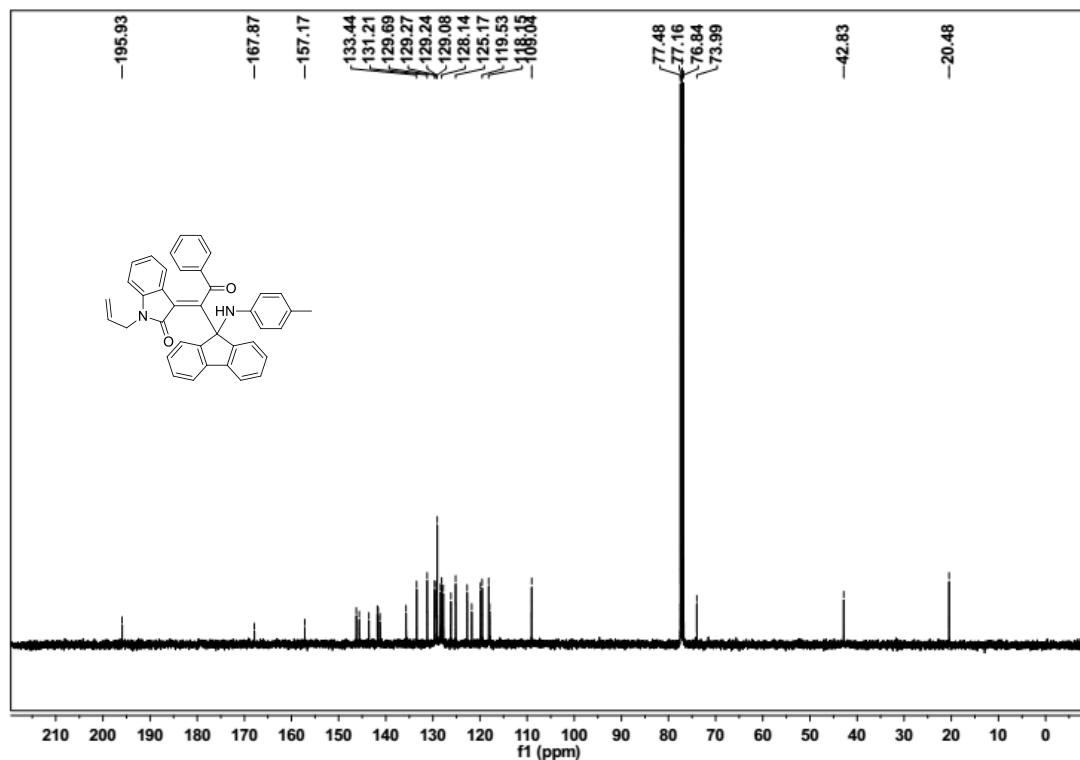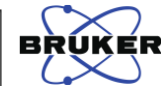

Current Data Parameters  
 NAME AM-6-F1  
 EXPNO 2  
 PROCNO 1

F2 - Acquisition Parameters  
 Date\_ 20190521  
 Time\_ 20.49  
 INSTRUM spect  
 PROBHD 5 mm PABBO BB/  
 PULPROG zgpg30  
 TD 65536  
 SOLVENT CDCl3  
 NS 512  
 DS 4  
 SWH 24038.461 Hz  
 FIDRES 0.366798 Hz  
 AQ 1.3631489 sec  
 RG 204.46  
 DW 20.800 usec  
 DE 6.50 usec  
 TE 297.4 K  
 D1 2.00000000 sec  
 D11 0.03000000 sec  
 TDO 1

==== CHANNEL f1 =====  
 SFO1 100.6479769 MHz  
 NUC1 13C  
 P1 10.62 usec  
 PLW1 54.00000000 W

==== CHANNEL f2 =====  
 SFO2 400.2316009 MHz  
 NUC2 1H  
 CFPDPRG2 waltz16  
 PCPD2 90.00 usec  
 PLW2 12.00000000 W  
 PLW12 0.24083000 W  
 PLW13 0.19508000 W

F2 - Processing parameters  
 SI 32768  
 SF 100.6379135 MHz  
 WDW EM  
 SSB 0  
 LB 1.00 Hz  
 GB 0  
 PC 1.40

<sup>13</sup>C NMR Spectrum of compound 3e

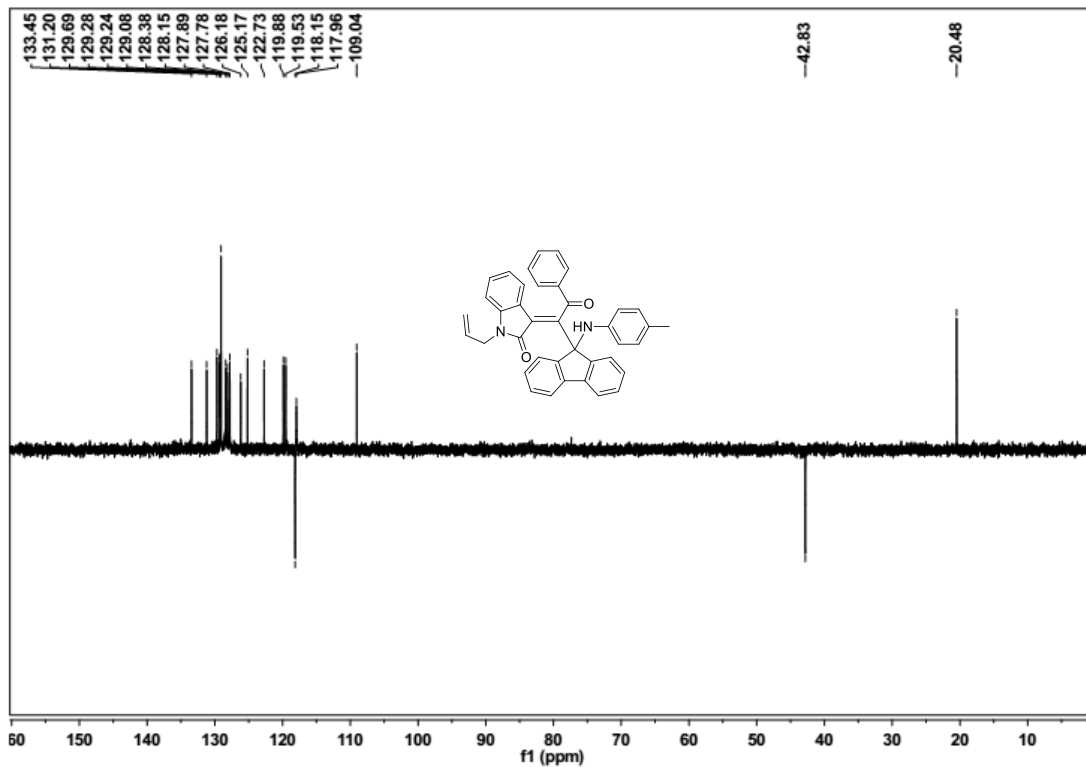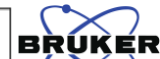

Current Data Parameters  
 NAME AM-6-F1  
 EXPNO 3  
 PROCNO 1

F2 - Acquisition Parameters  
 Date 2019021  
 Time 21.09  
 INSTRUM spect  
 PROBRD 5 mm PABBO BB/  
 PULPROG deptsp135  
 TD 65536  
 SOLVENT cdcl3  
 NS 256  
 DS 4  
 SWH 16129.032 Hz  
 FIDRES 0.246110 Hz  
 AQ 2.0316160 sec  
 RG 204.46  
 DW 31.000 usec  
 DE 6.50 usec  
 TE 296.9 K  
 CNST2 145.0000000  
 D1 2.0000000 sec  
 D2 0.00344828 sec  
 D12 0.00002000 sec  
 TDO 1

===== CHANNEL f1 =====  
 SFO1 100.6459641 MHz  
 NUC1 13C  
 P1 10.62 usec  
 P13 2000.00 usec  
 PL10 0 W  
 PLW1 54.00000000 W  
 SFOAL5 Crp60comp.4  
 SFOFFS5 0 Hz  
 SPW5 9.30539989 W

===== CHANNEL f2 =====  
 SFO2 400.2312800 MHz  
 NUC2 1H  
 CPDPRG2 waltz16  
 P3 12.75 usec  
 P4 25.50 usec  
 PCPD2 90.00 usec  
 PLW2 12.00000000 W  
 PLW12 0.24083000 W

F2 - Processing parameters  
 SI 32768  
 SF 100.6379125 MHz  
 MDM EM  
 SSB 0  
 LB 1.00 Hz  
 GB 0  
 PC 1.40

DEPT- 135 Spectrum of compound 3e

AM3-6F1 #67 RT: 1.19 AV: 1 NL: 3.38E7  
 T: FTMS (1,1) + p ESI Full ms [100.00-1500.00]

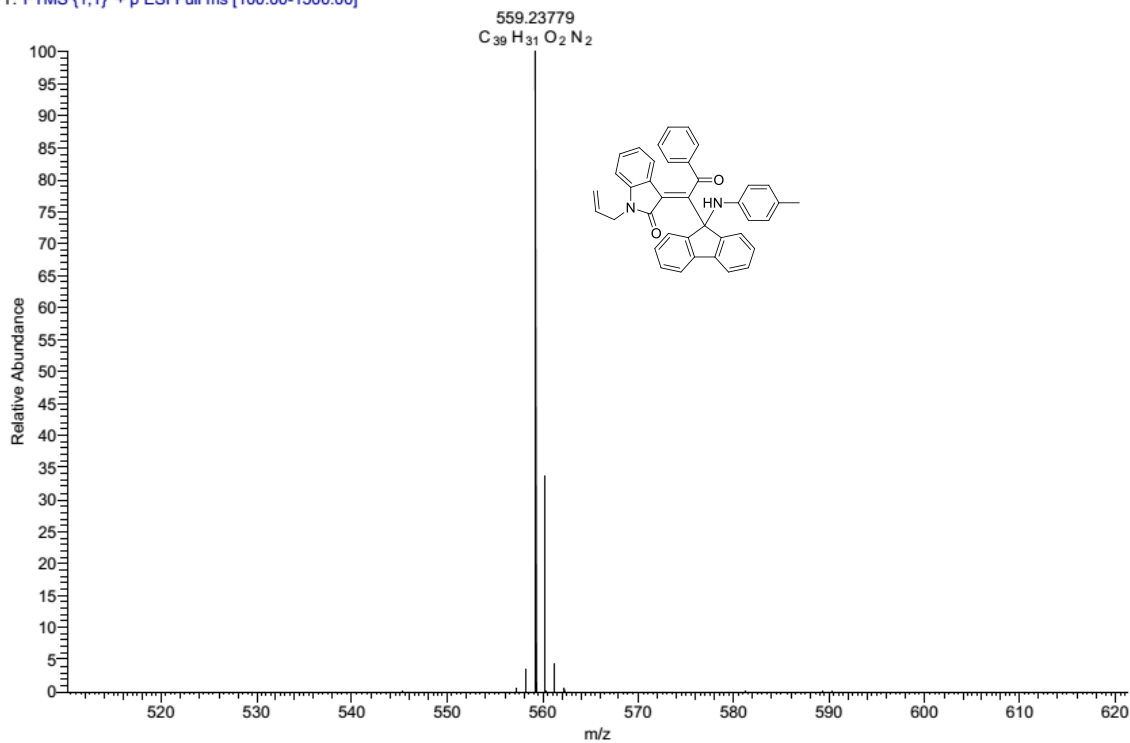

HRMS Spectrum of Compound 3e

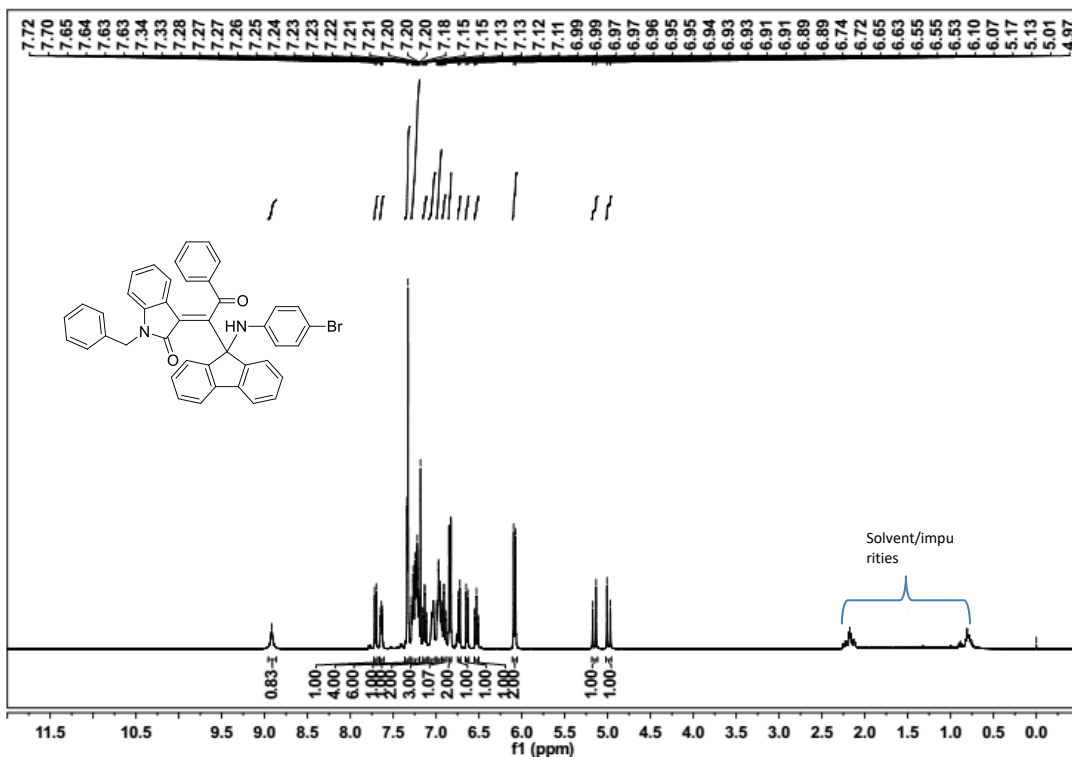

**BRUKER**

Current Data Parameters  
 NAME AM3-9-F1R  
 EXPNO 1  
 PROCNO 1

F2 - Acquisition Parameters  
 Date 20190528  
 Time 23.04  
 INSTRUM spect  
 PROBHD 5 mm PABBO BB/  
 PULPROG zg30  
 TD 65536  
 SOLVENT CDCl3  
 NS 16  
 DS 2  
 SWH 8012.820 Hz  
 FIDRES 0.122266 Hz  
 AQ 4.0894465 sec  
 RG 114.23  
 DW 62.400 usec  
 DE 6.50 usec  
 TE 296.3 K  
 D1 1.00000000 sec  
 TDO 1

===== CHANNEL f1 =====  
 SFO1 400.2324716 MHz  
 NUC1 1H  
 P1 12.75 usec  
 PLW1 12.00000000 W

F2 - Processing parameters  
 SI 65536  
 SF 400.2300411 MHz  
 WDW EM  
 SSB 0  
 LB 0.30 Hz  
 GB 0  
 PC 1.00

<sup>1</sup>H NMR spectrum of compound 3f

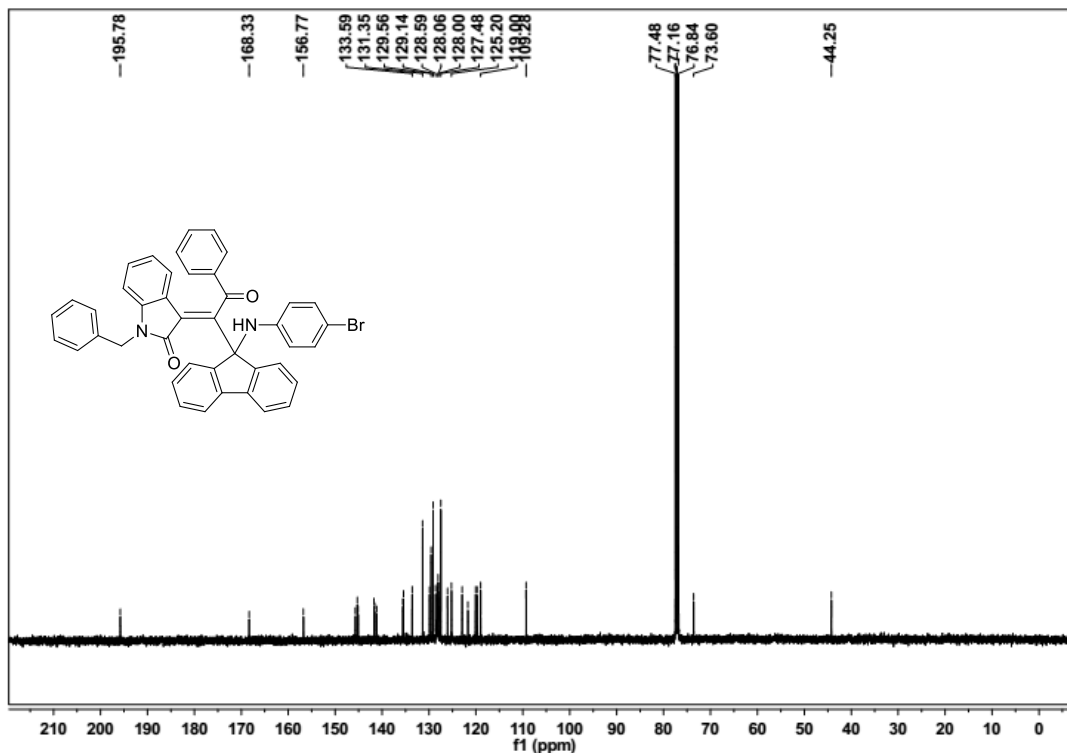

**BRUKER**

Current Data Parameters  
 NAME AM3-9-F1R  
 EXPNO 2  
 PROCNO 1

F2 - Acquisition Parameters  
 Date 20190528  
 Time 23.34  
 INSTRUM spect  
 PROBHD 5 mm PABBO BB/  
 PULPROG zgpg30  
 TD 65536  
 SOLVENT CDCl3  
 NS 512  
 DS 4  
 SWH 24038.461 Hz  
 FIDRES 0.366798 Hz  
 AQ 1.3631488 sec  
 RG 204.46  
 DW 20.800 usec  
 DE 6.50 usec  
 TE 297.3 K  
 D1 2.00000000 sec  
 D11 0.03000000 sec  
 TDO 1

===== CHANNEL f1 =====  
 SFO1 100.6479769 MHz  
 NUC1 13C  
 P1 10.62 usec  
 PLW1 54.00000000 W

===== CHANNEL f2 =====  
 SFO2 400.2316009 MHz  
 NUC2 1H  
 CPDPRG2 waltz16  
 PCPD2 90.00 usec  
 PLW2 12.00000000 W  
 PLW12 0.24083000 W  
 PLW13 0.19508000 W

F2 - Processing parameters  
 SI 32768  
 SF 100.6379135 MHz  
 WDW EM  
 SSB 0  
 LB 1.00 Hz  
 GB 0  
 PC 1.40

<sup>13</sup>C NMR Spectrum of compound 3f

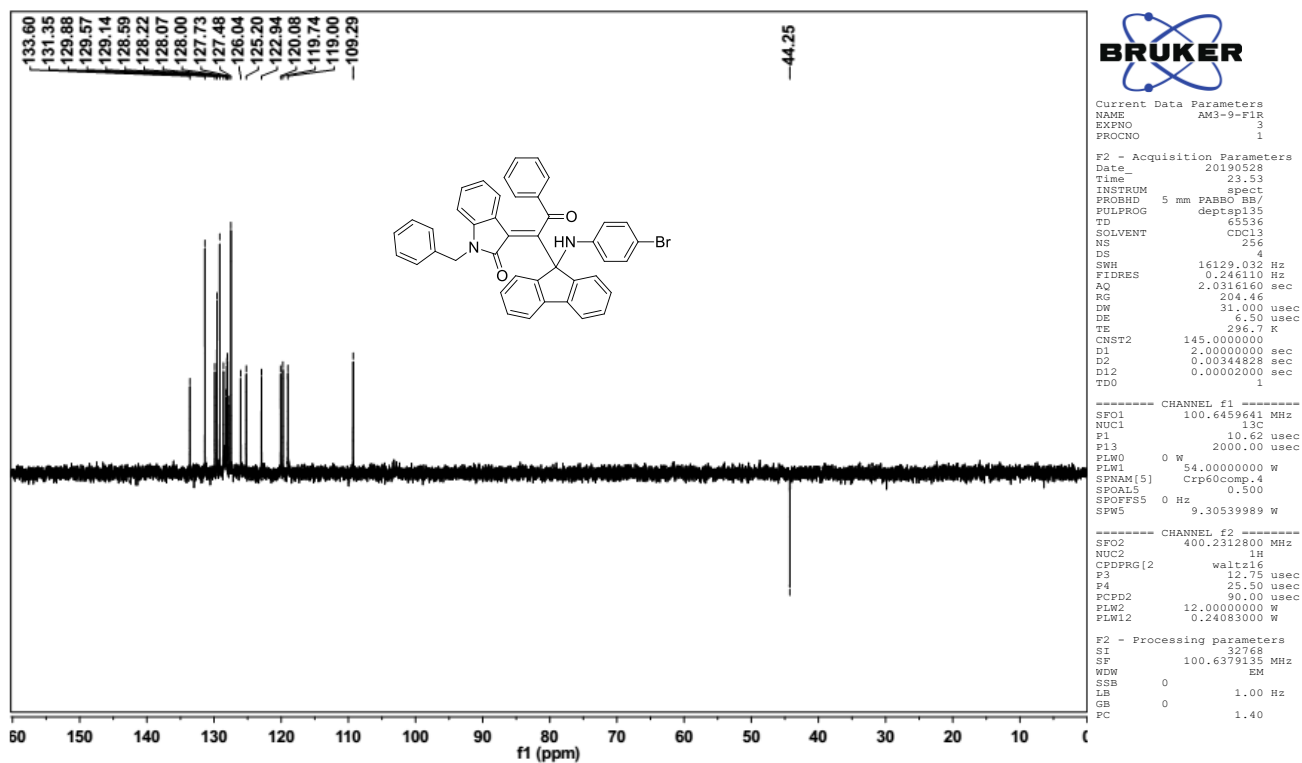

DEPT- 135 Spectrum of compound 3f

AM-3-9-F1 #82 RT: 1.37 AV: 1 NL: 6.37E5  
T: FTMS {1,1} + p ESI Full ms [100.00-1500.00]

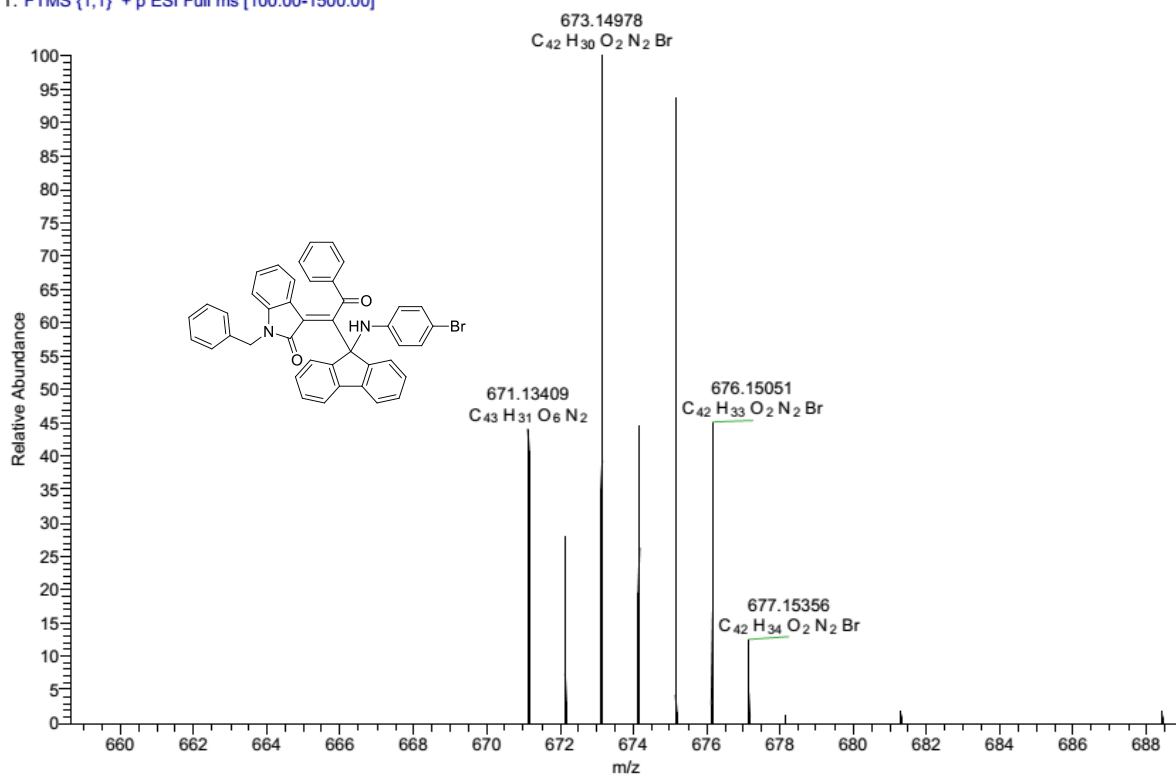

HRMS Spectrum of Compound 3f

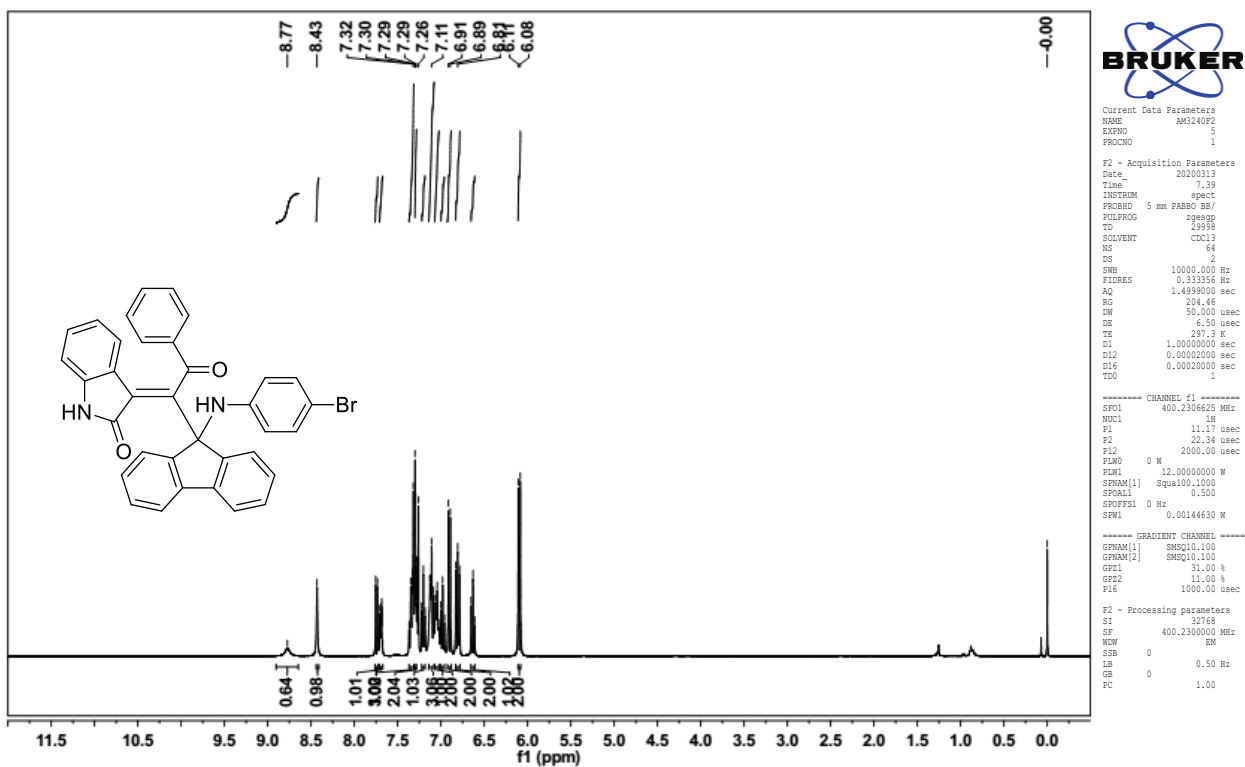

<sup>1</sup>H NMR spectrum of compound 3g

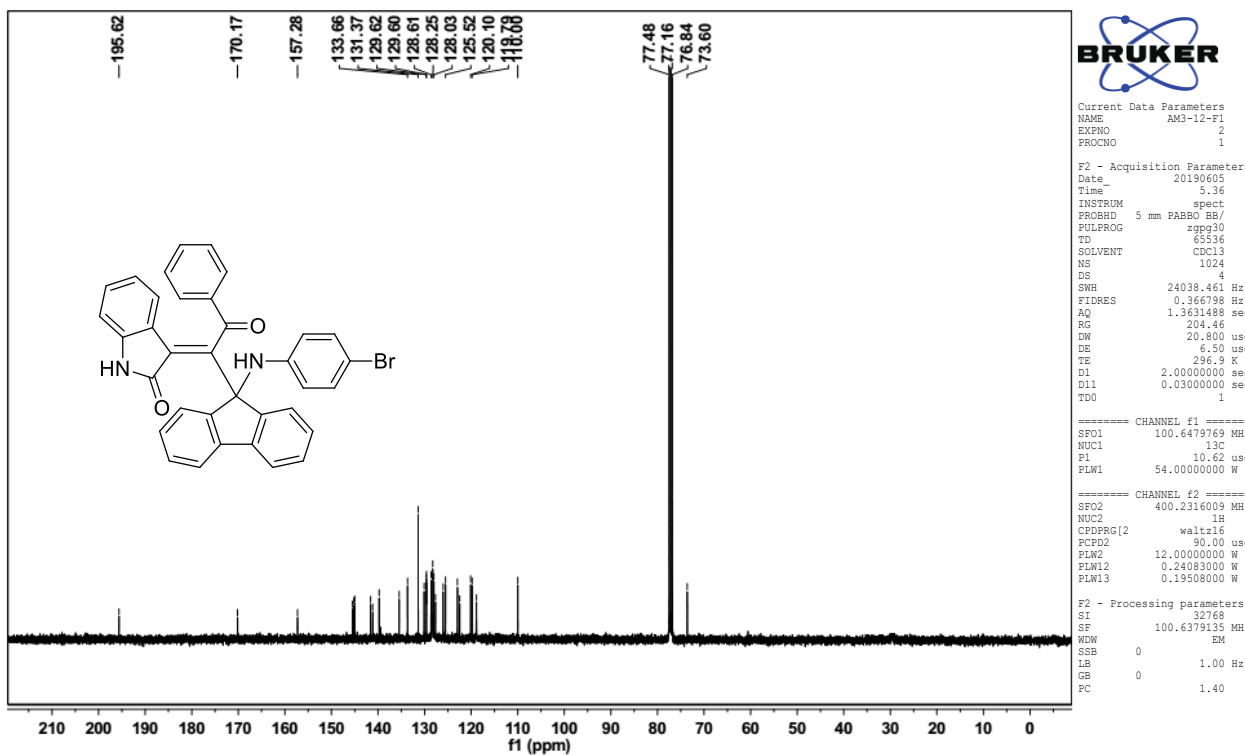

<sup>13</sup>C NMR Spectrum of compound 3g

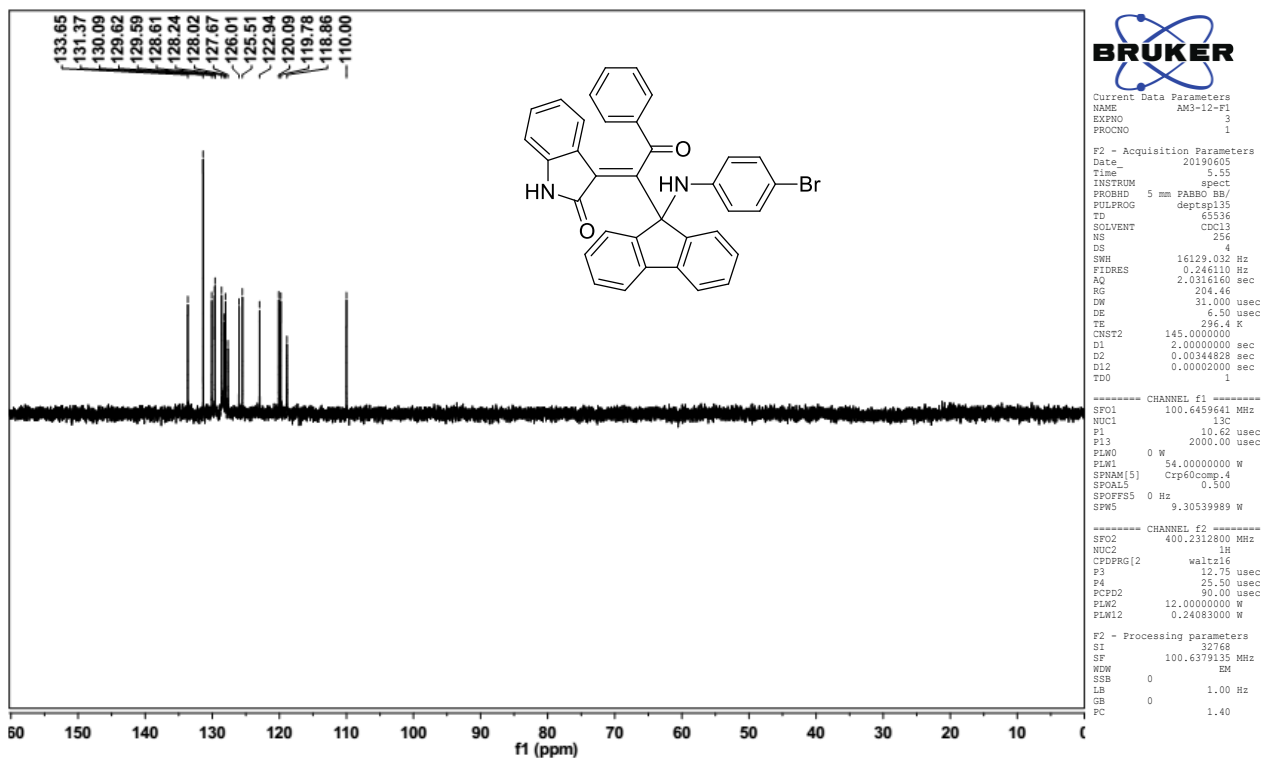

DEPT- 135 Spectrum of compound **3g**

AM3-12F1 #69 RT: 1.15 AV: 1 NL: 1.86E6  
 T: FTMS (1,1) + p ESI Full ms (100.00-1500.00)

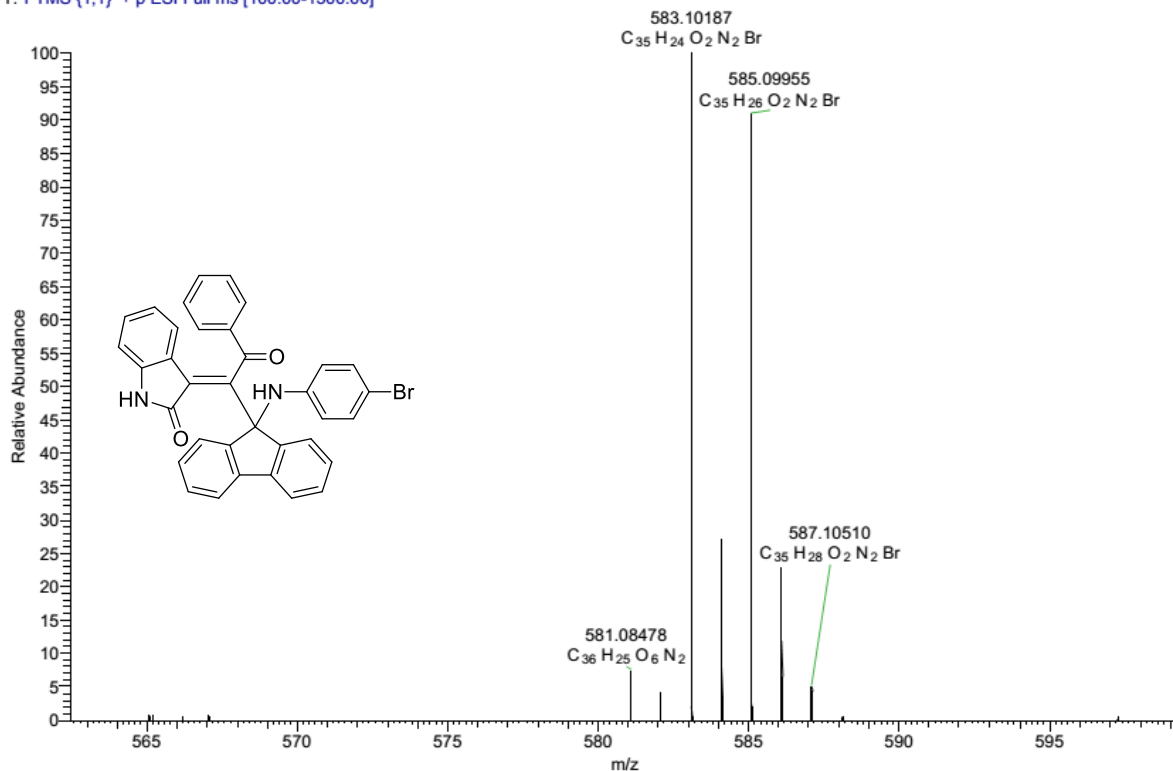

HRMS Spectrum of Compound **3g**

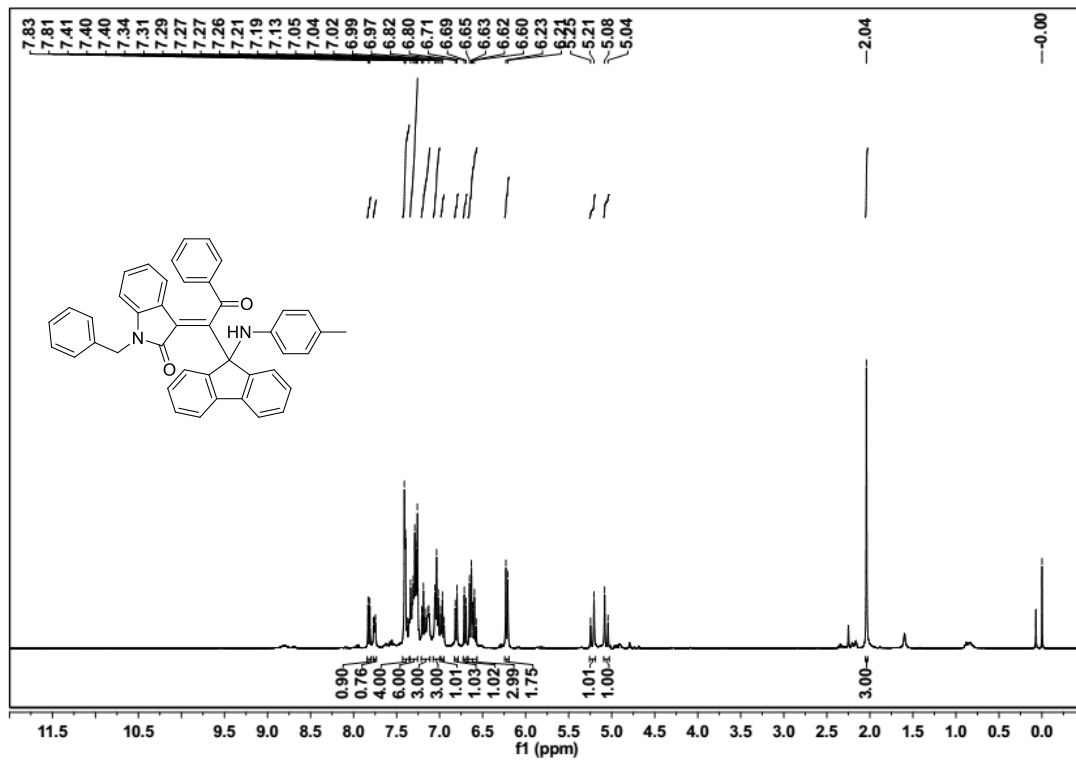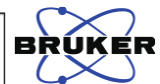

Current Data Parameters  
 NAME AM242F1r5  
 EXPNO 1  
 PROCNO 1

F2 - Acquisition Parameters  
 Date\_ 20200318  
 Time\_ 9.46  
 INSTRUM spect  
 PROBHD 5 mm PABBO BB/  
 PULPROG zg30  
 TD 65536  
 SOLVENT CDCl3  
 NS 16  
 DS 2  
 SWH 8012.820 Hz  
 FIDRES 0.122266 Hz  
 AQ 4.0894465 sec  
 RG 114.23  
 DW 62.400 usec  
 DE 6.50 usec  
 TE 292.9 K  
 D1 1.00000000 sec  
 TDO 1

===== CHANNEL f1 =====  
 SFO1 400.2324716 MHz  
 NUC1 1H  
 P1 12.75 usec  
 PLW1 12.00000000 W

F2 - Processing parameters  
 SI 65536  
 SF 400.2300104 MHz  
 WDW EM  
 SSB 0  
 LB 0.30 Hz  
 GB 0  
 PC 1.00

<sup>1</sup>H NMR spectrum of compound 3h

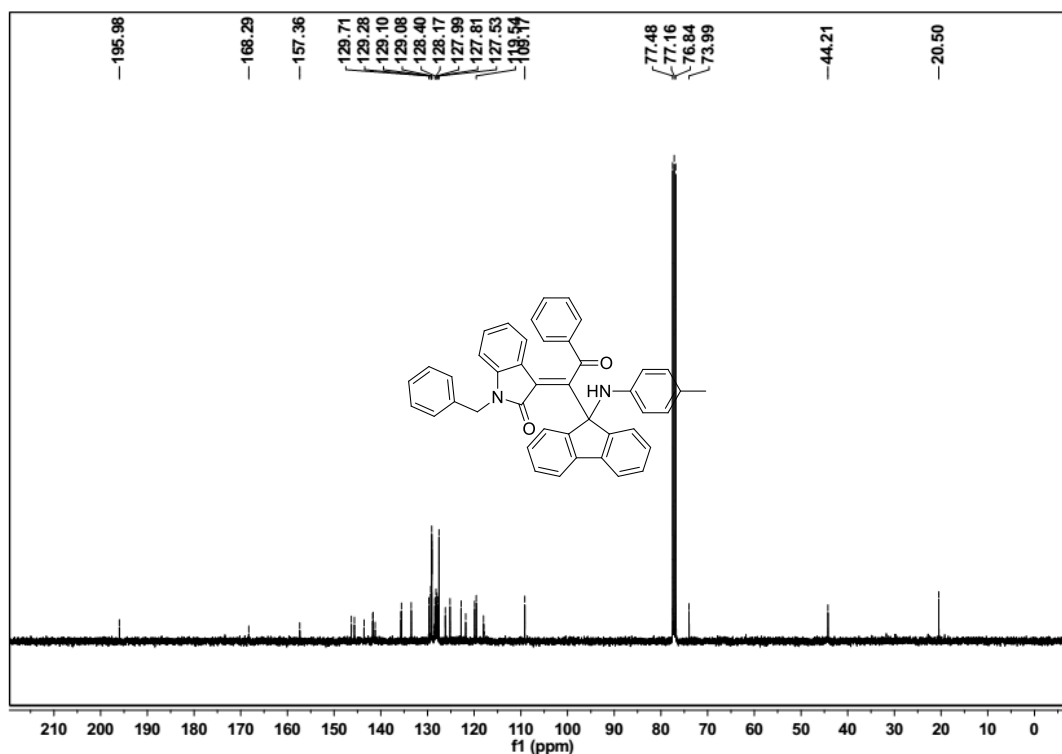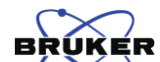

Current Data Parameters  
 NAME AM11-242-F1  
 EXPNO 1  
 PROCNO 1

F2 - Acquisition Parameters  
 Date\_ 20190424  
 Time\_ 15.40  
 INSTRUM spect  
 PROBHD 5 mm PABBO BB/  
 PULPROG zgpg30  
 TD 65536  
 SOLVENT CDCl3  
 NS 512  
 DS 4  
 SWH 24038.461 Hz  
 FIDRES 0.366798 Hz  
 AQ 1.3631488 sec  
 RG 204.46  
 DW 20.800 usec  
 DE 6.50 usec  
 TE 297.6 K  
 D1 2.00000000 sec  
 D11 0.03000000 sec  
 TDO 1

===== CHANNEL f1 =====  
 SFO1 100.6479769 MHz  
 NUC1 13C  
 P1 10.62 usec  
 PLW1 54.00000000 W

===== CHANNEL f2 =====  
 SFO2 400.2316009 MHz  
 NUC2 1H  
 CPDPRG2 waltz16  
 PCPD2 90.00 usec  
 PLW2 12.00000000 W  
 PLW12 0.24083000 W  
 PLW13 0.19508000 W

F2 - Processing parameters  
 SI 32768  
 SF 100.6379135 MHz  
 WDW EM  
 SSB 0  
 LB 1.00 Hz  
 GB 0  
 PC 1.40

<sup>13</sup>C NMR Spectrum of compound 3h



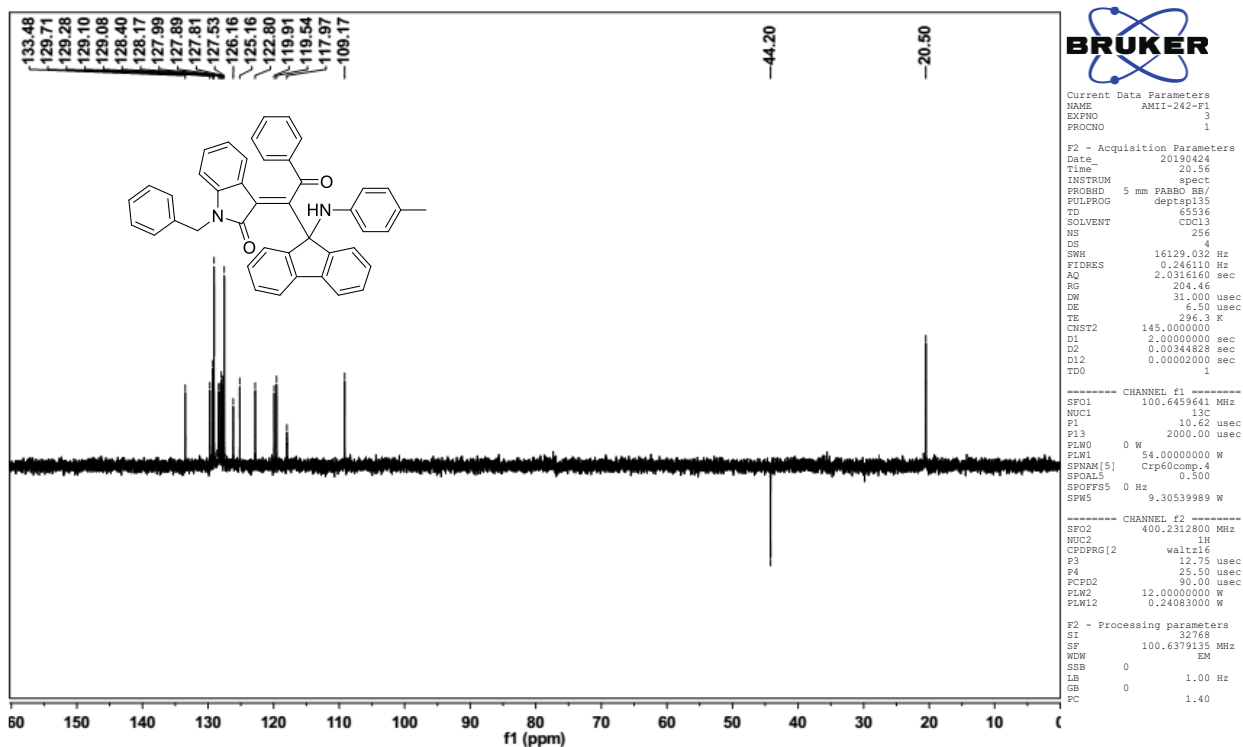

DEPT- 135 Spectrum of compound 3h

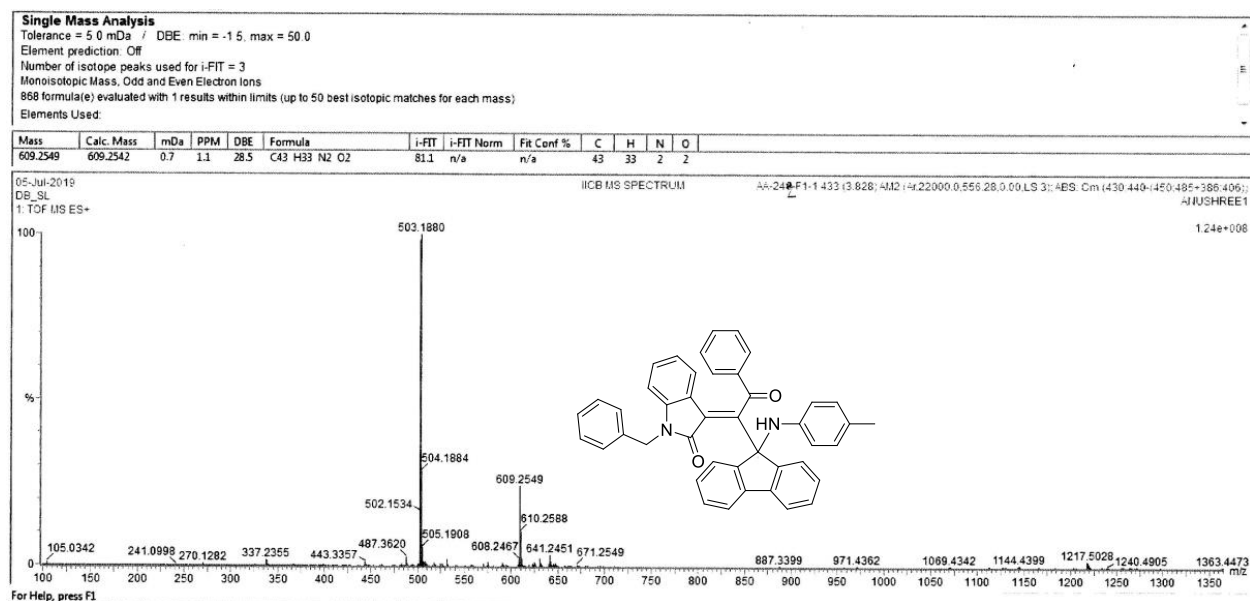

HRMS Spectrum of Compound 3h

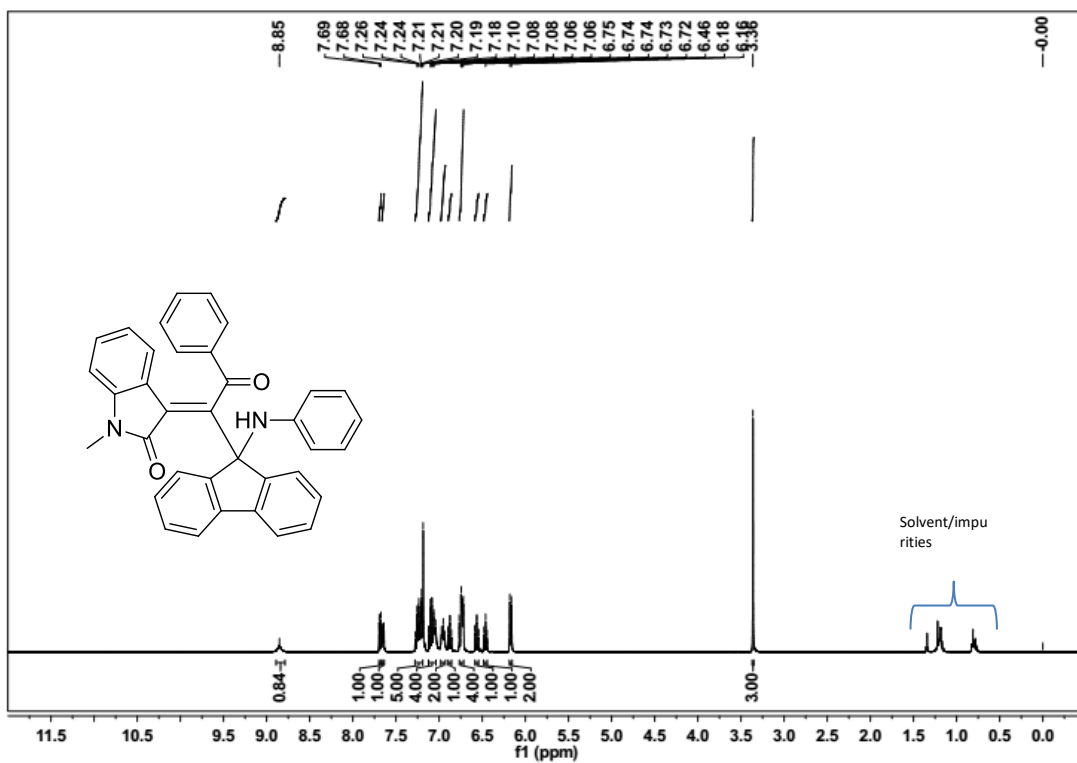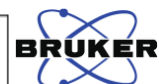

Current Data Parameters  
 NAME AM3-27-F1  
 EXPNO 1  
 PROCNO 1

F2 - Acquisition Parameters  
 Date\_ 20190628  
 Time 4.48  
 INSTRUM spect  
 PROBHD 5 mm PABBO BB/  
 PULPROG zg30  
 TD 65536  
 SOLVENT CDCl3  
 NS 64  
 DS 2  
 SWH 8012.820 Hz  
 FIDRES 0.122266 Hz  
 AQ 4.0894465 sec  
 RG 128.33  
 DW 62.400 usec  
 DE 6.50 usec  
 TE 294.8 K  
 D1 1.0000000 sec  
 TDO 1

===== CHANNEL f1 =====  
 SFO1 400.2324716 MHz  
 NUC1 1H  
 P1 12.75 usec  
 PLW1 12.0000000 W

F2 - Processing parameters  
 SI 65536  
 SF 400.2300399 MHz  
 WDW EM  
 SSB 0  
 LB 0.30 Hz  
 GB 0  
 PC 1.00

<sup>1</sup>H NMR spectrum of compound 3i

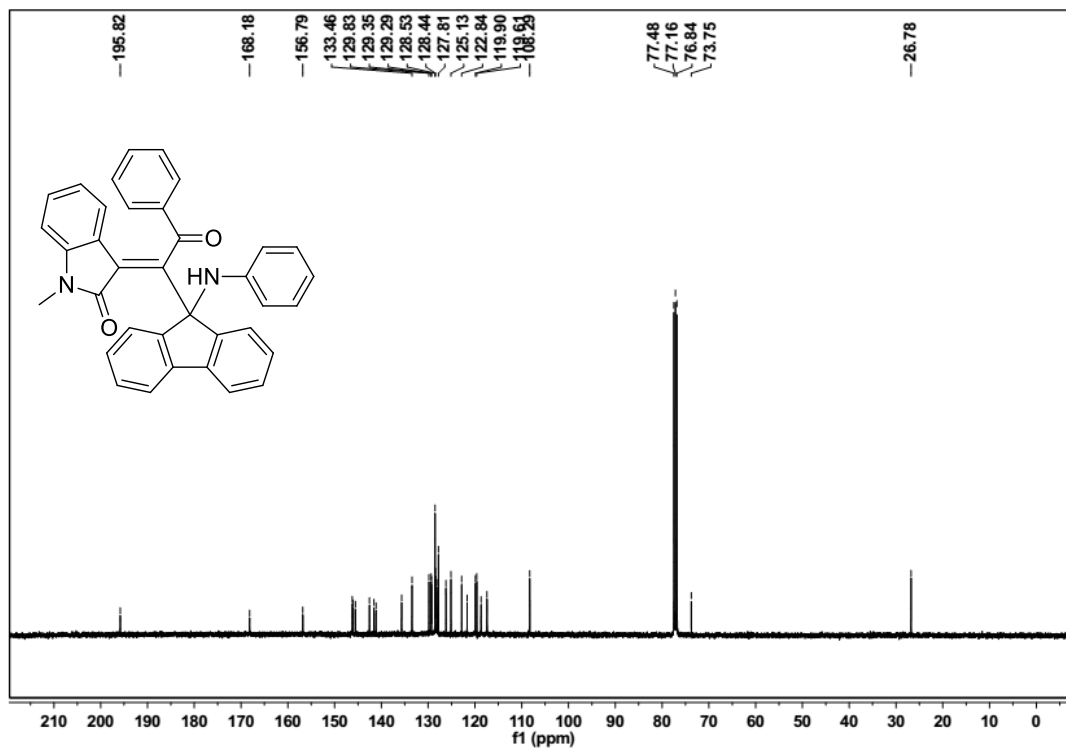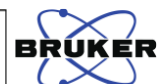

Current Data Parameters  
 NAME AM3-27-F1  
 EXPNO 2  
 PROCNO 1

F2 - Acquisition Parameters  
 Date\_ 20190628  
 Time 5.48  
 INSTRUM spect  
 PROBHD 5 mm PABBO BB/  
 PULPROG zgpg30  
 TD 65536  
 SOLVENT CDCl3  
 NS 1024  
 DS 4  
 SWH 24038.461 Hz  
 FIDRES 0.366798 Hz  
 AQ 1.3631488 sec  
 RG 204.46  
 DW 20.800 usec  
 DE 6.50 usec  
 TE 296.2 K  
 D1 2.0000000 sec  
 D11 0.0300000 sec  
 TDO 1

===== CHANNEL f1 =====  
 SFO1 100.647919 MHz  
 NUC1 13C  
 P1 10.62 usec  
 PLW1 54.0000000 W

===== CHANNEL f2 =====  
 SFO2 400.2316009 MHz  
 NUC2 1H  
 CPDPRG2 waltz16  
 PCPD2 90.00 usec  
 PLW2 12.0000000 W  
 PLW12 0.24083000 W  
 PLW13 0.19508000 W

F2 - Processing parameters  
 SI 32768  
 SF 100.6379135 MHz  
 WDW EM  
 SSB 0  
 LB 1.00 Hz  
 GB 0  
 PC 1.40

<sup>13</sup>C NMR Spectrum of compound 3i

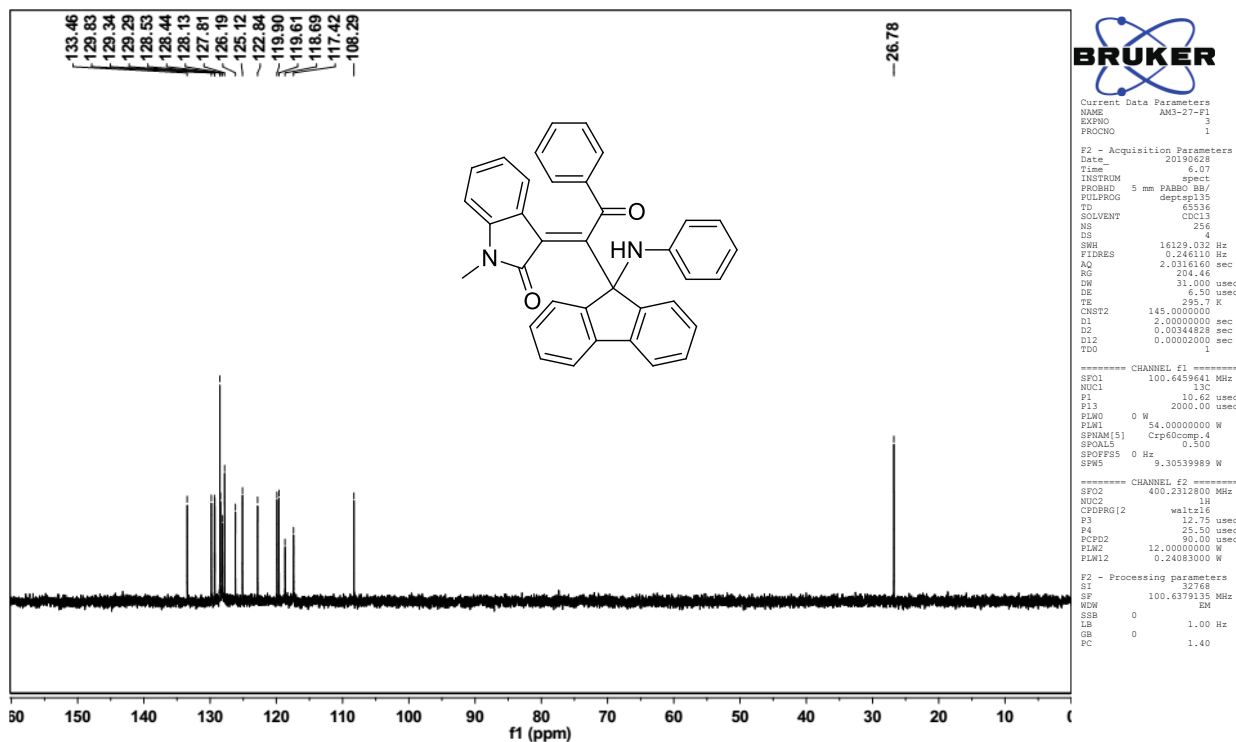

DEPT- 135 Spectrum of compound **3i**

AM3-27F1 #71 RT: 1.21 AV: 1 NL: 9.97E6  
 T: FTMS (1,1) + p ESI Full ms [100.00-1500.00]

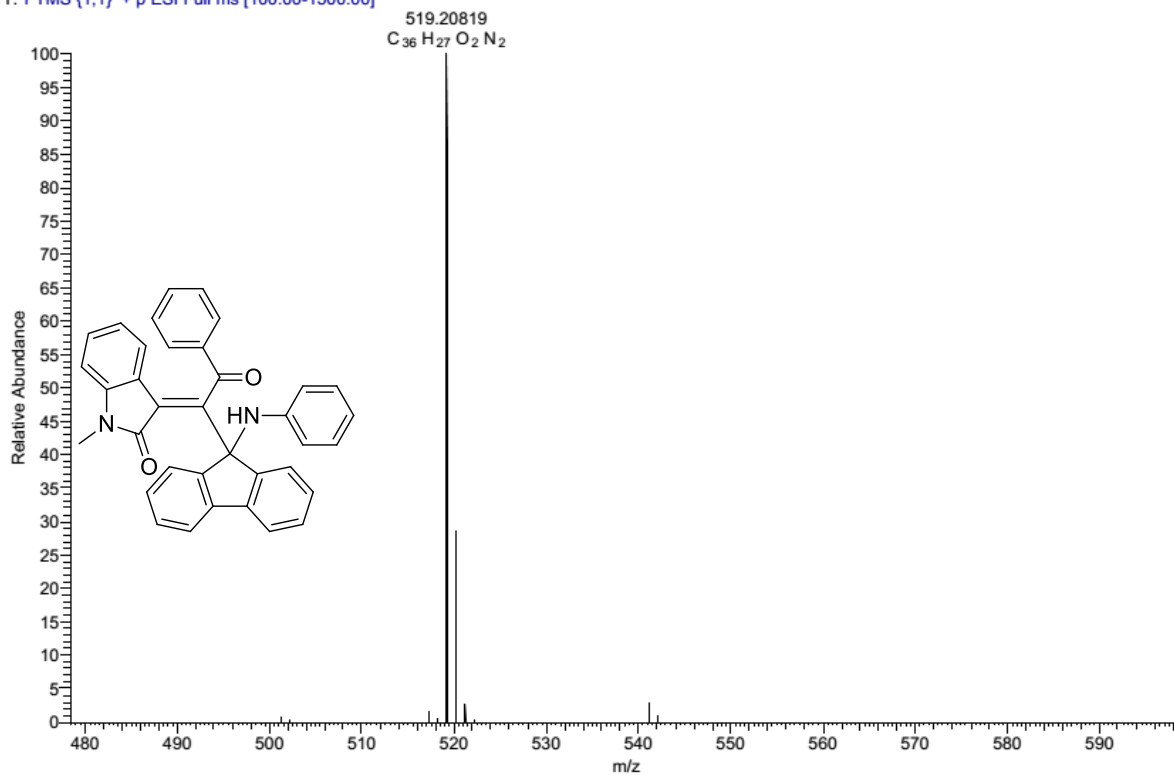

HRMS Spectrum of Compound **3i**

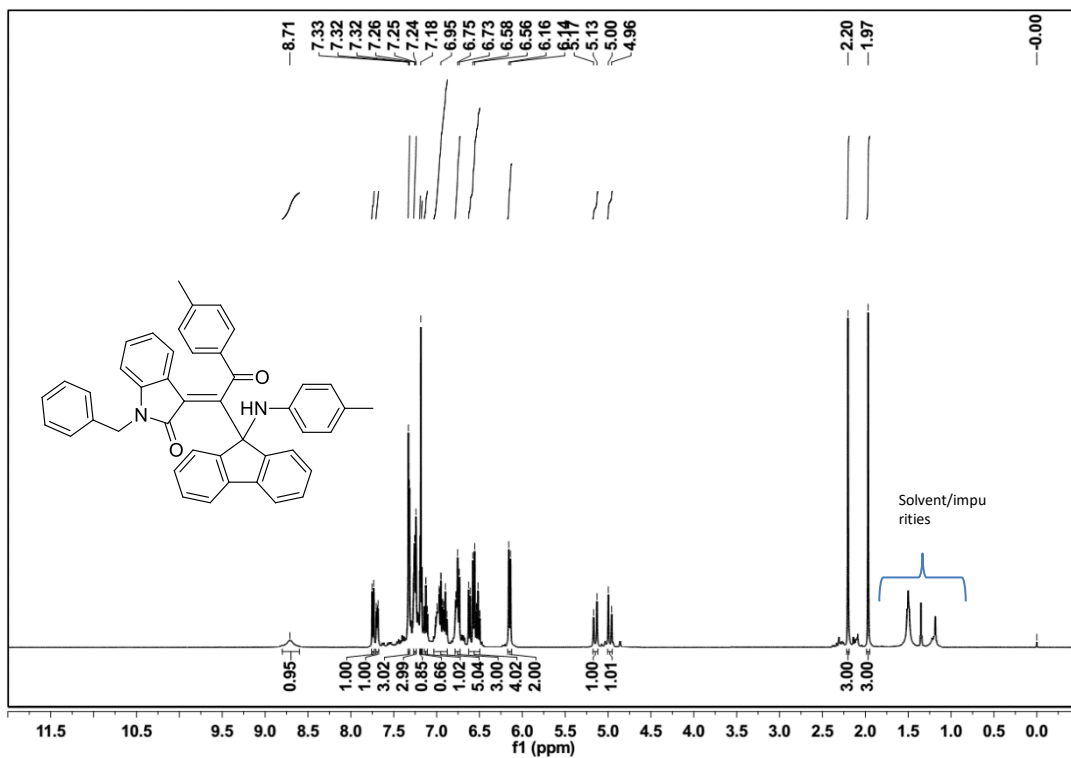

**BRUKER**

Current Data Parameters  
 NAME AM3-24F3  
 EXPNO 1  
 PROCNO 1

F2 - Acquisition Parameters  
 Date\_ 20190713  
 Time 18.04  
 INSTRUM spect  
 PROBHD 5 mm PABBO BB/  
 PULPROG zg30  
 TD 65536  
 SOLVENT CDCl3  
 NS 64  
 DS 2  
 SWH 8012.820 Hz  
 FIDRES 0.122266 Hz  
 AQ 4.0894465 sec  
 RG 128.33  
 DW 62.400 usec  
 DE 6.50 usec  
 TE 296.7 K  
 D1 1.00000000 sec  
 TDO 1

==== CHANNEL f1 =====  
 SFO1 400.2324716 MHz  
 NUC1 1H  
 P1 12.75 usec  
 PLW1 12.00000000 W

F2 - Processing parameters  
 SI 65536  
 SF 400.2300400 MHz  
 WDW EM  
 SSB 0  
 LB 0.30 Hz  
 GB 0  
 PC 1.00

<sup>1</sup>H NMR spectrum of compound 3j

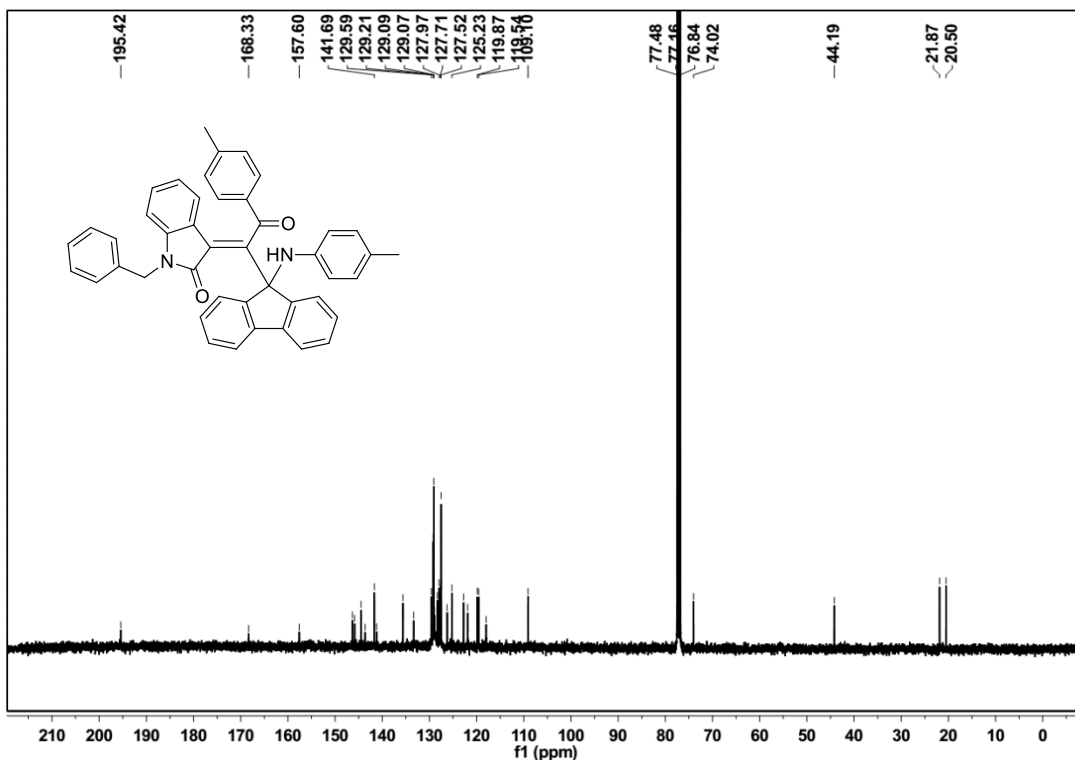

**BRUKER**

Current Data Parameters  
 NAME AM3-24F3  
 EXPNO 2  
 PROCNO 1

F2 - Acquisition Parameters  
 Date\_ 20190713  
 Time 19.04  
 INSTRUM spect  
 PROBHD 5 mm PABBO BB/  
 PULPROG zgpg30  
 TD 65536  
 SOLVENT CDCl3  
 NS 1024  
 DS 4  
 SWH 24038.461 Hz  
 FIDRES 0.366798 Hz  
 AQ 1.3631488 sec  
 RG 204.46  
 DW 20.800 usec  
 DE 6.50 usec  
 TE 298.0 K  
 D1 2.00000000 sec  
 D11 0.03000000 sec  
 TDO 1

==== CHANNEL f1 =====  
 SFO1 100.6479769 MHz  
 NUC1 13C  
 P1 10.62 usec  
 PLW1 54.00000000 W

==== CHANNEL f2 =====  
 SFO2 400.2316009 MHz  
 NUC2 1H  
 CPDPRG2 waltz16  
 PCPD2 90.00 usec  
 PLW2 12.00000000 W  
 PLW12 0.24083000 W  
 PLW13 0.19508000 W

F2 - Processing parameters  
 SI 32768  
 SF 100.6379135 MHz  
 WDW EM  
 SSB 0  
 LB 1.00 Hz  
 GB 0  
 PC 1.40

<sup>13</sup>C NMR Spectrum of compound 3j

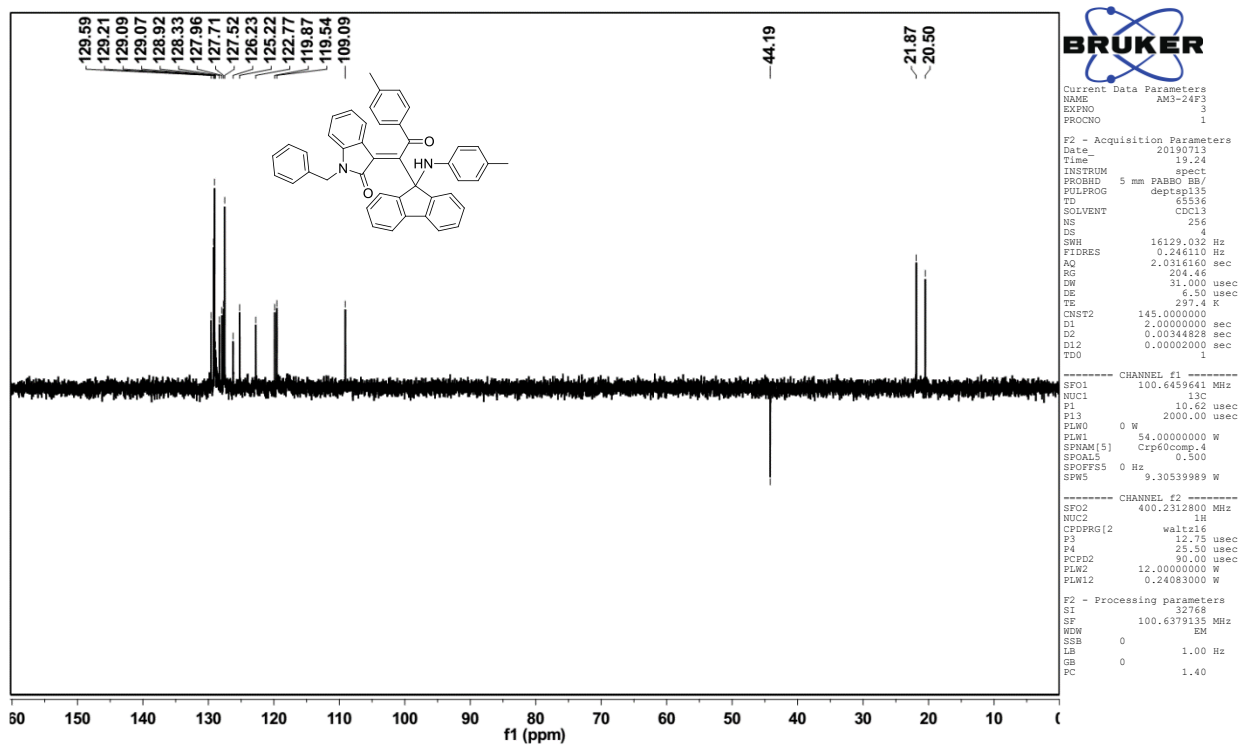

DEPT- 135 Spectrum of compound 3j

AM-3-24F1 #71 RT: 1.29 AV: 1 NL: 1.75E7  
 T: FTMS (1,1) + p ESI Full ms [100.00-1500.00]

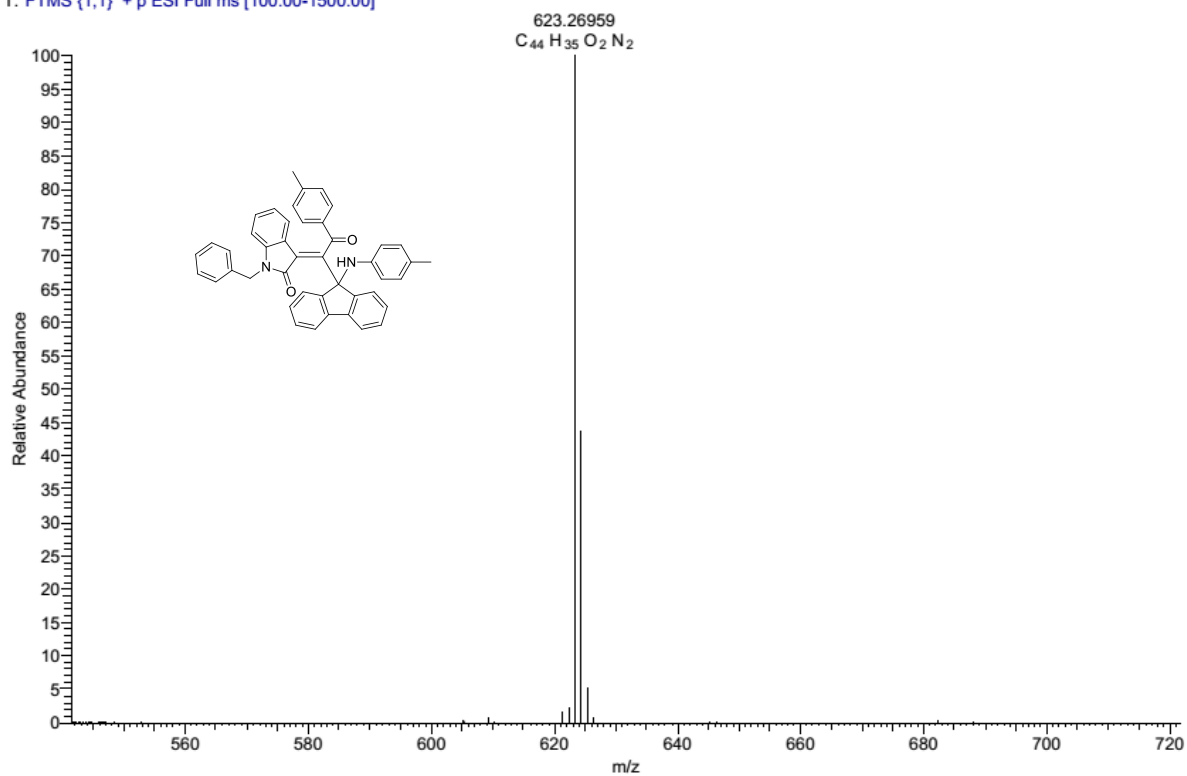

HRMS Spectrum of Compound 3j

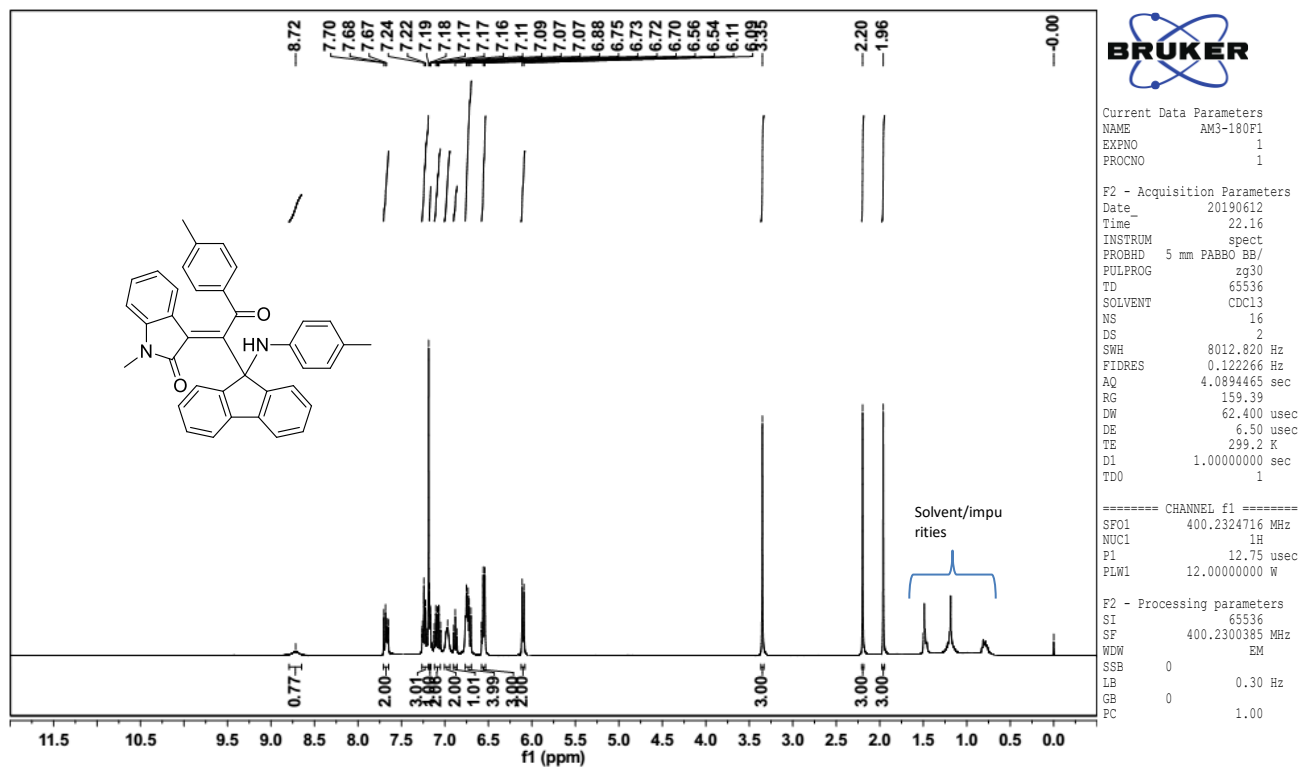

**<sup>1</sup>H NMR spectrum of compound 3k**

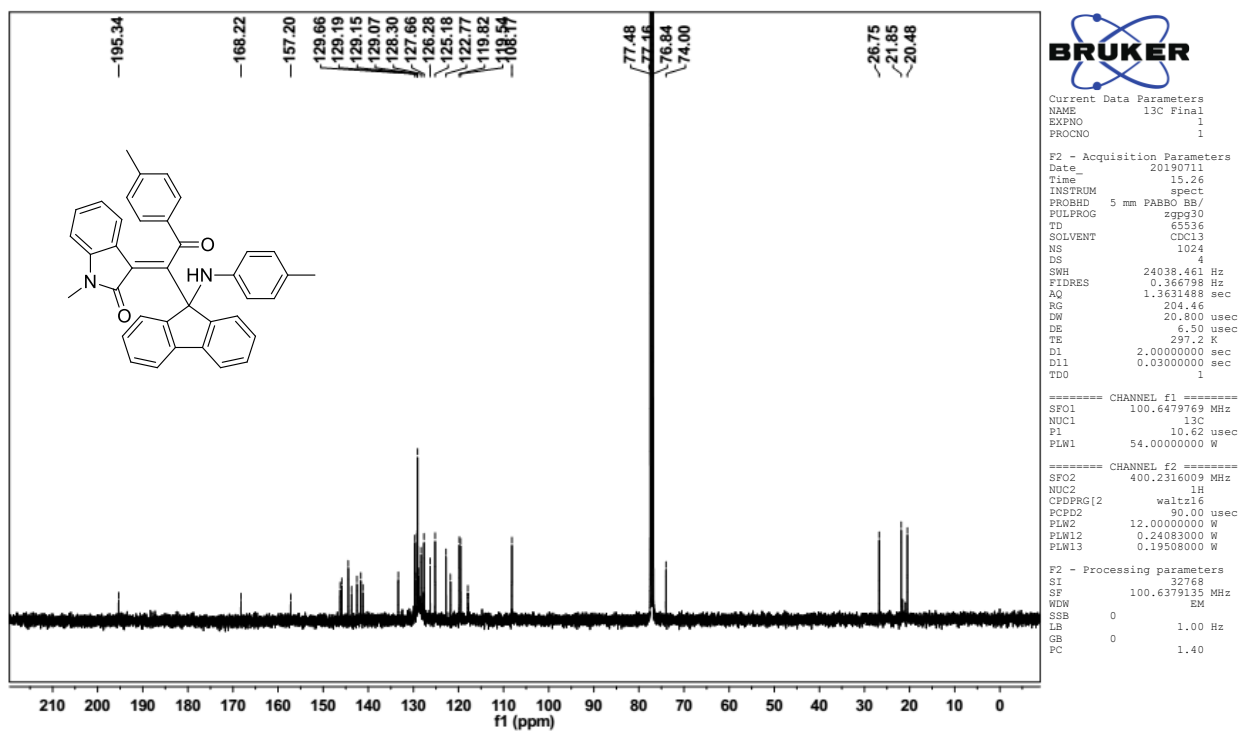

**<sup>13</sup>C NMR Spectrum of compound 3k**

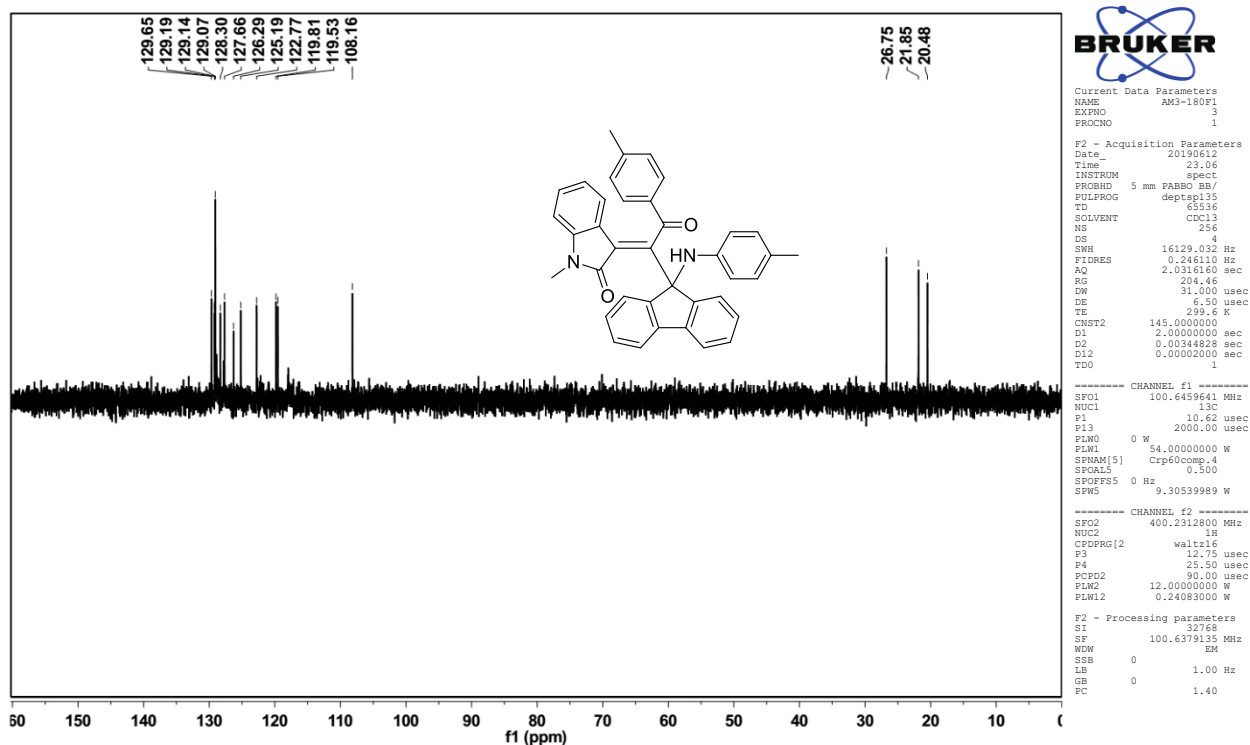

DEPT- 135 Spectrum of compound **3k**

AM3-18-F1 #65 RT: 1.16 AV: 1 NL: 1.32E7  
 T: FTMS (1,1) + p ESI Full ms [100.00-1500.00]

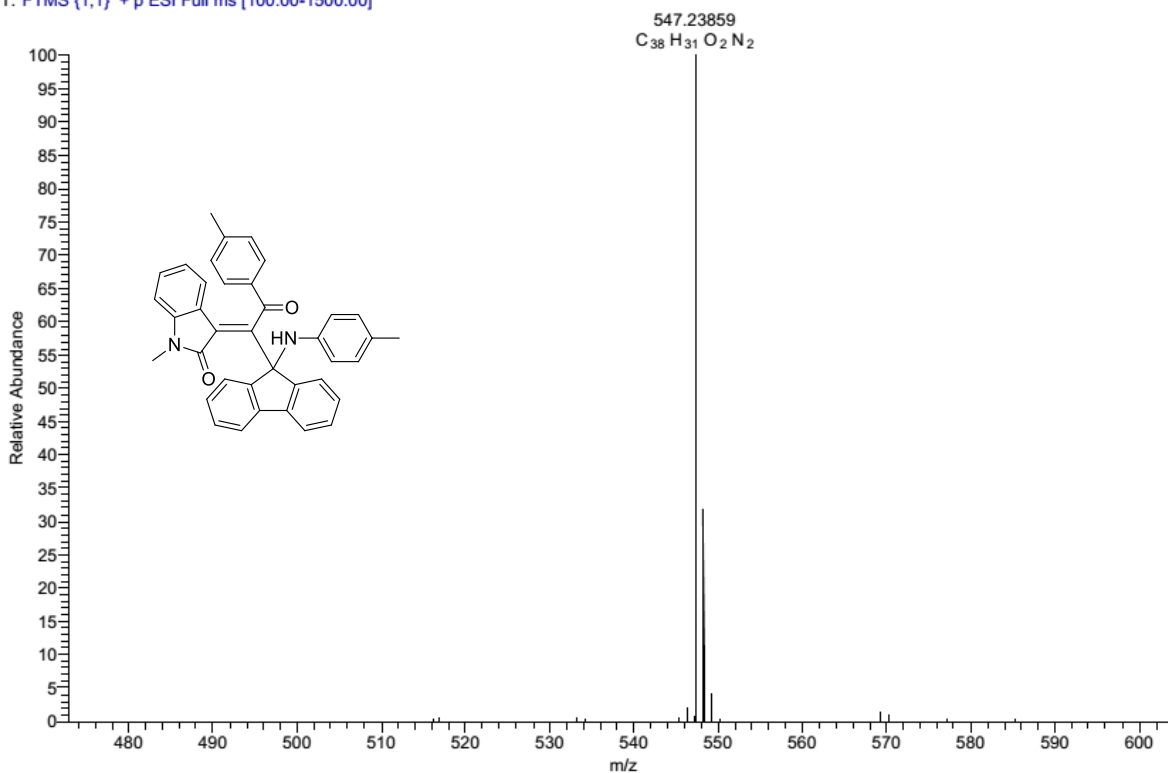

HRMS Spectrum of Compound **3k**

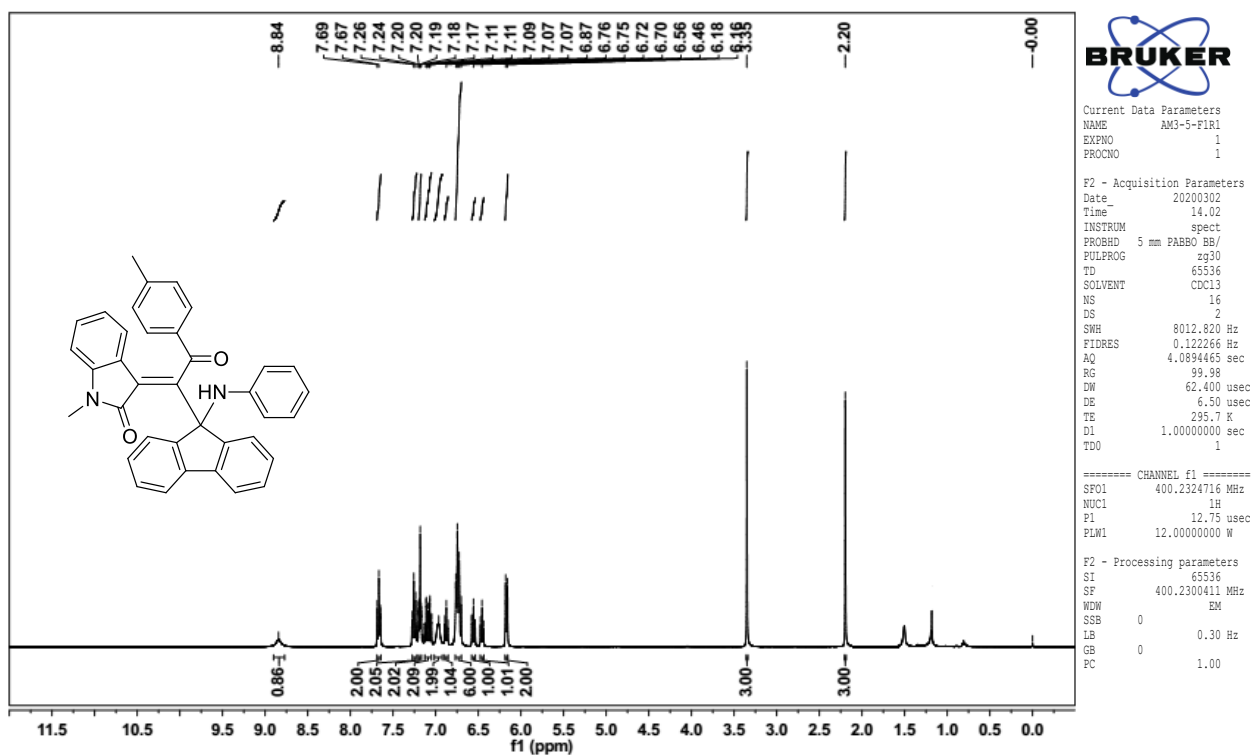

<sup>1</sup>H NMR spectrum of compound 31

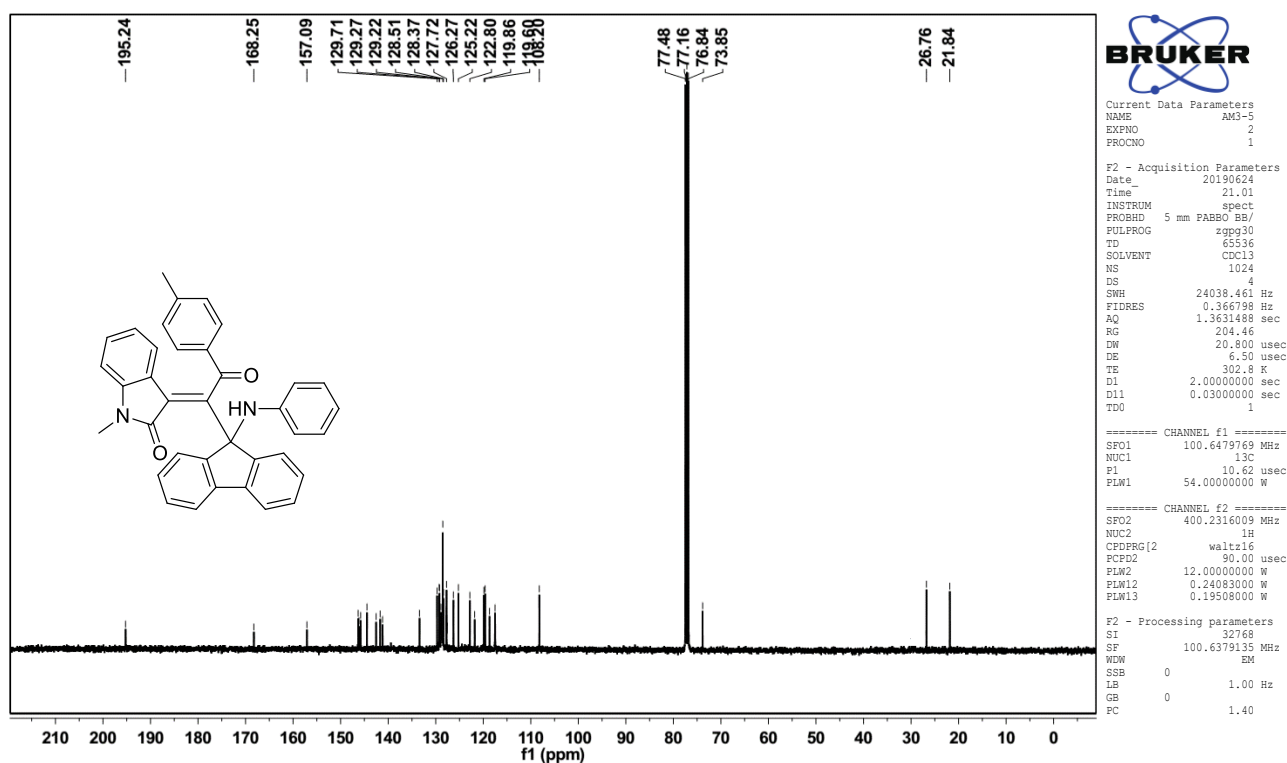

<sup>13</sup>C NMR Spectrum of compound 31



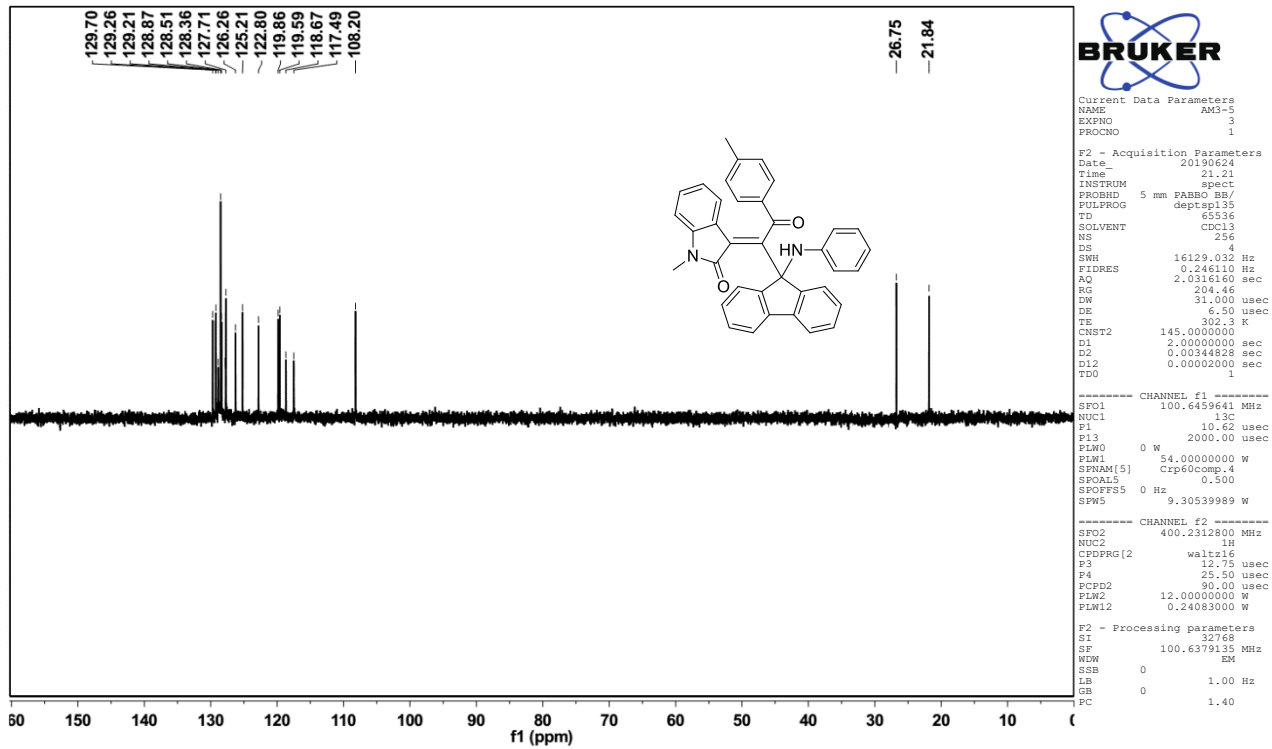

DEPT- 135 Spectrum of compound 31

AM3-SF1 #69 RT: 1.22 AV: 1 NL: 1.07E7  
 T: FTMS (1,1) + p ESI Full ms [100.00-1500.00]

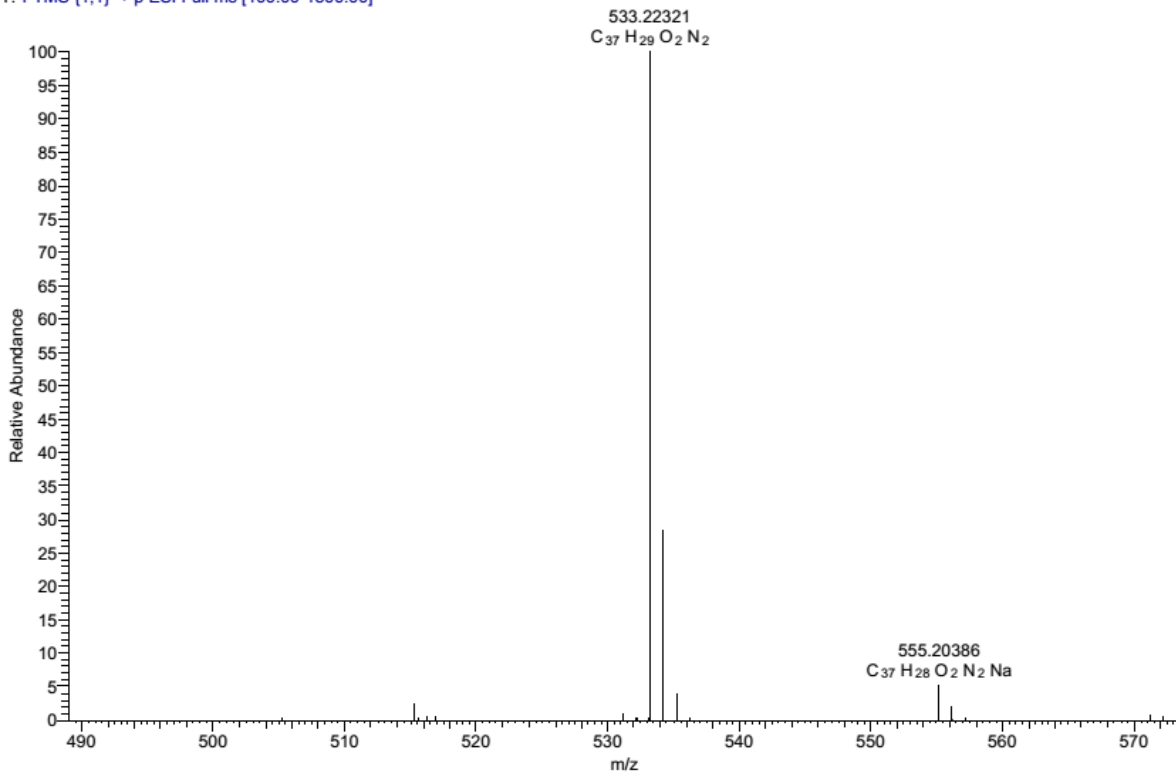

HRMS Spectrum of Compound 31

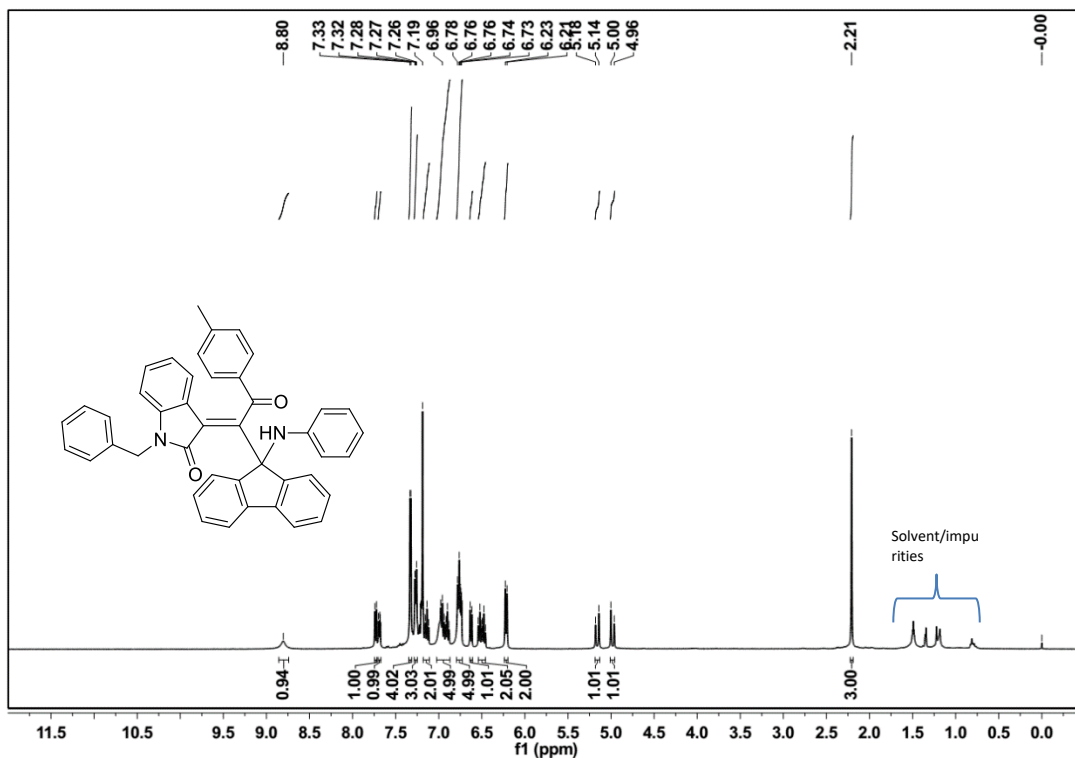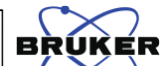

Current Data Parameters  
 NAME AM3-26F1 Final 1H  
 EXPNO 1  
 PROCNO 1

F2 - Acquisition Parameters  
 Date 20190711  
 Time 18.26  
 INSTRUM spect  
 PROBHD 5 mm PABBO BB/  
 PULPROG zg30  
 TD 65536  
 SOLVENT CDCl3  
 NS 64  
 DS 2  
 SWH 8012.820 Hz  
 FIDRES 0.122266 Hz  
 AQ 4.0894465 sec  
 RG 145.06  
 DW 62.400 usec  
 DE 6.50 usec  
 TE 295.3 K  
 D1 1.00000000 sec  
 TDO 1

===== CHANNEL f1 =====  
 SFO1 400.2324716 MHz  
 NUC1 1H  
 P1 12.75 usec  
 PLW1 12.00000000 W

F2 - Processing parameters  
 SI 65536  
 SF 400.2300386 MHz  
 WDW EM  
 SSB 0  
 LB 0.30 Hz  
 GB 0  
 PC 1.00

<sup>1</sup>H NMR spectrum of compound 3m

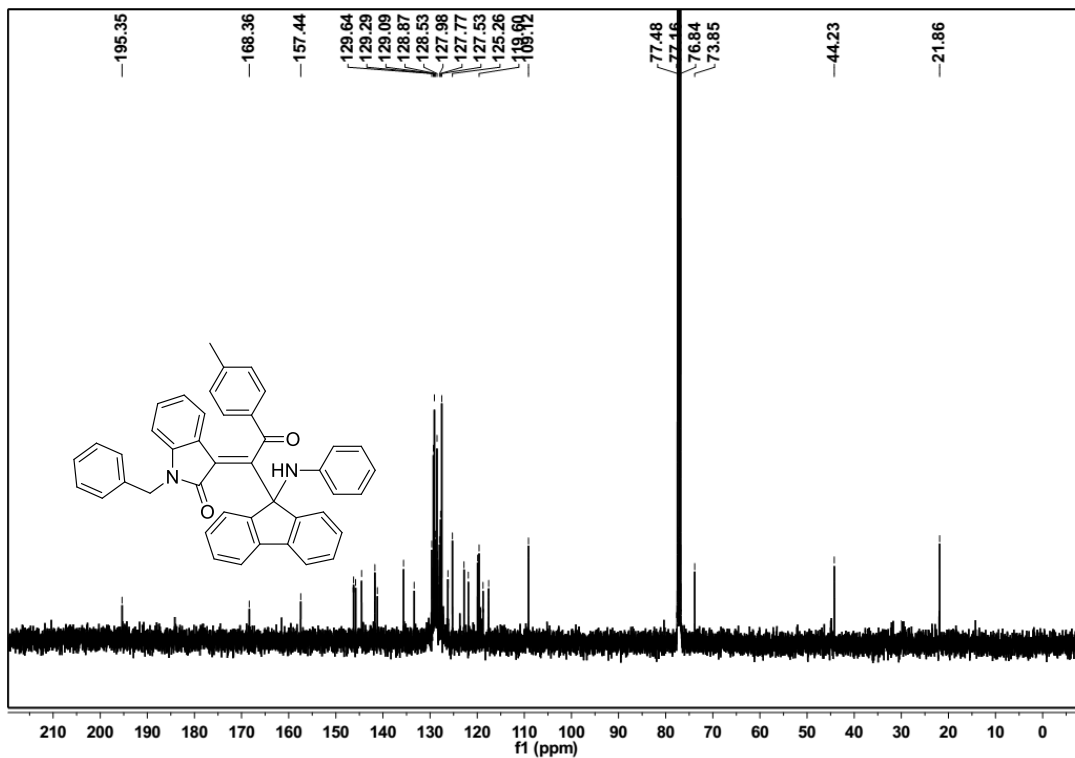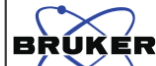

Current Data Parameters  
 NAME AM3-26-F1  
 EXPNO 2  
 PROCNO 1

F2 - Acquisition Parameters  
 Date 20190619  
 Time 14.50  
 INSTRUM spect  
 PROBHD 5 mm PABBO BB/  
 PULPROG zgpg30  
 TD 65536  
 SOLVENT CDCl3  
 NS 512  
 DS 4  
 SWH 24038.461 Hz  
 FIDRES 0.366798 Hz  
 AQ 1.3631488 sec  
 RG 204.46  
 DW 20.800 usec  
 DE 6.50 usec  
 TE 302.3 K  
 D1 2.00000000 sec  
 D11 0.03000000 sec  
 TDO 1

===== CHANNEL f1 =====  
 SFO1 100.6479769 MHz  
 NUC1 13C  
 P1 10.62 usec  
 PLW1 54.00000000 W

===== CHANNEL f2 =====  
 SFO2 400.2316009 MHz  
 NUC2 1H  
 CPDPRG[2] waltz16  
 PCPD2 90.00 usec  
 PLW2 12.00000000 W  
 PLW12 0.24083000 W  
 PLW13 0.19508000 W

F2 - Processing parameters  
 SI 32768  
 SF 100.6379135 MHz  
 WDW EM  
 SSB 0  
 LB 1.00 Hz  
 GB 0  
 PC 1.40

<sup>13</sup>C NMR spectrum of compound 3m

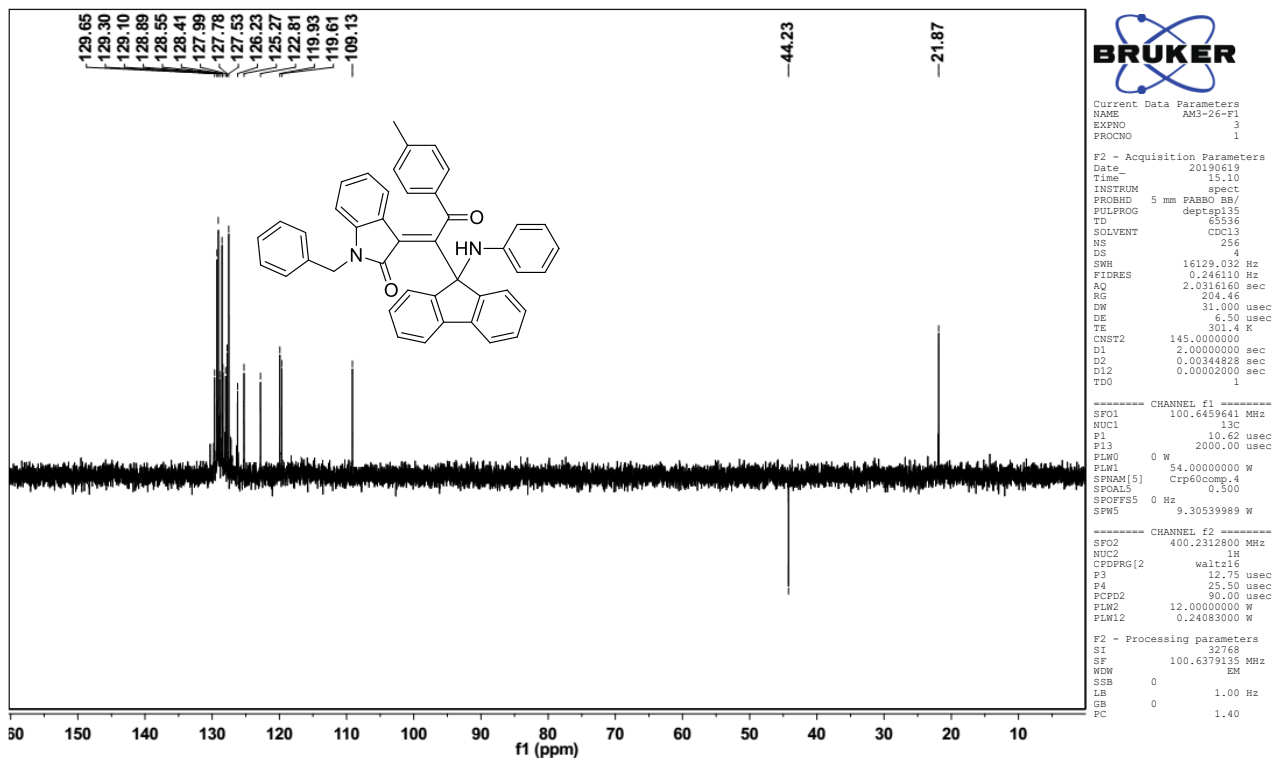

DEPT- 135 Spectrum of compound **3m**

AM3-26F1 #90 RT: 1.25 AV: 1 NL: 1.47E7  
 T: FTMS {1,1} + p ESI Full ms [100.00-1500.00]

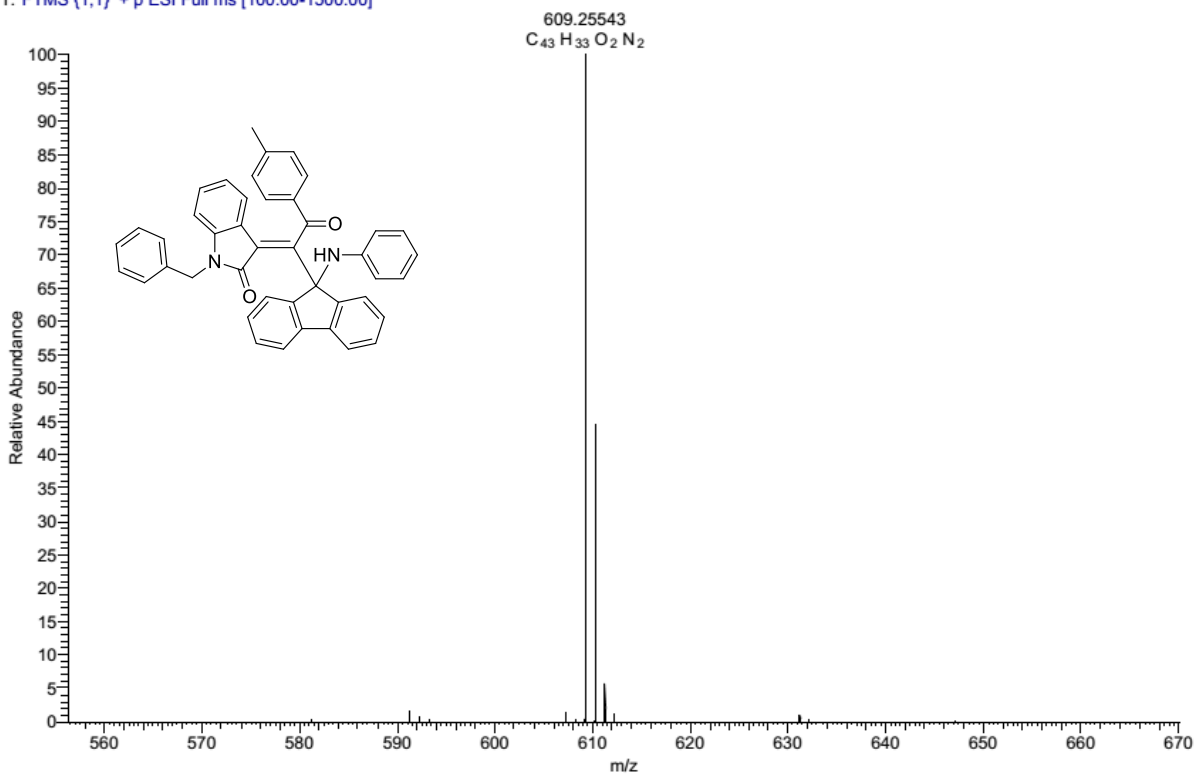

HRMS Spectrum of Compound **3m**

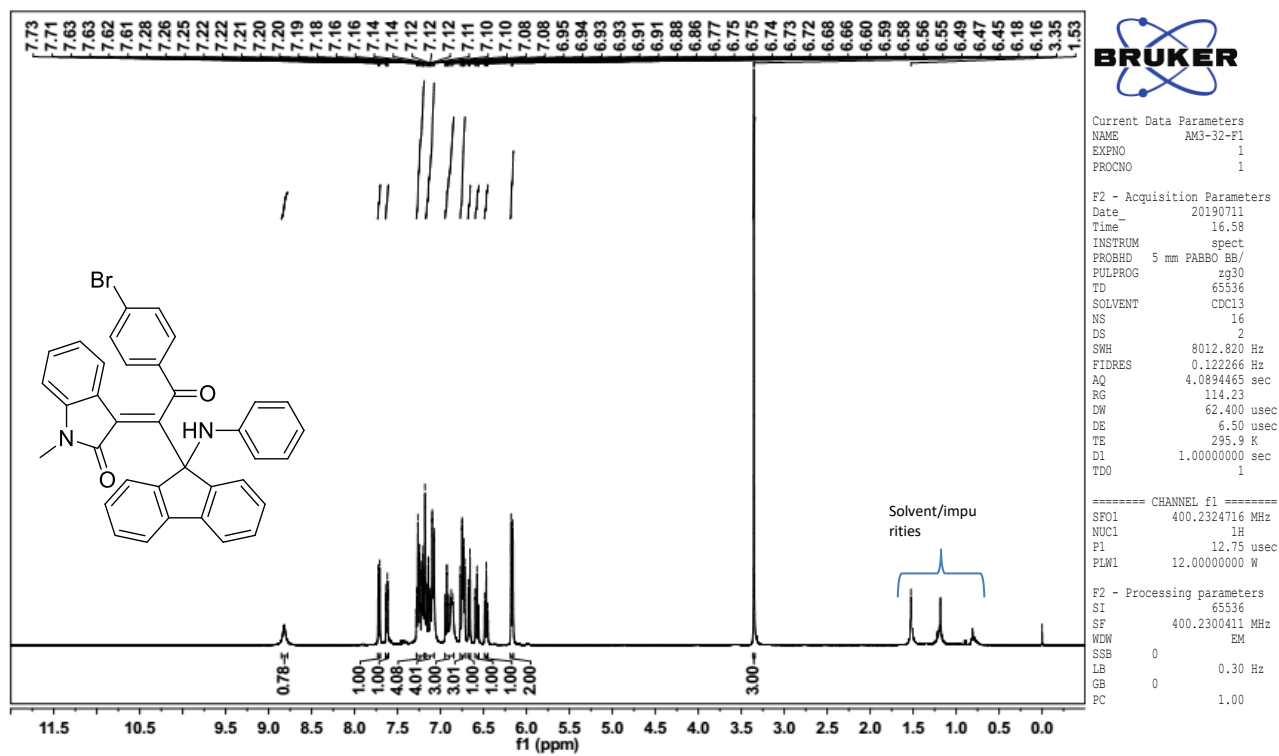

**<sup>1</sup>H NMR spectrum of compound 3n**

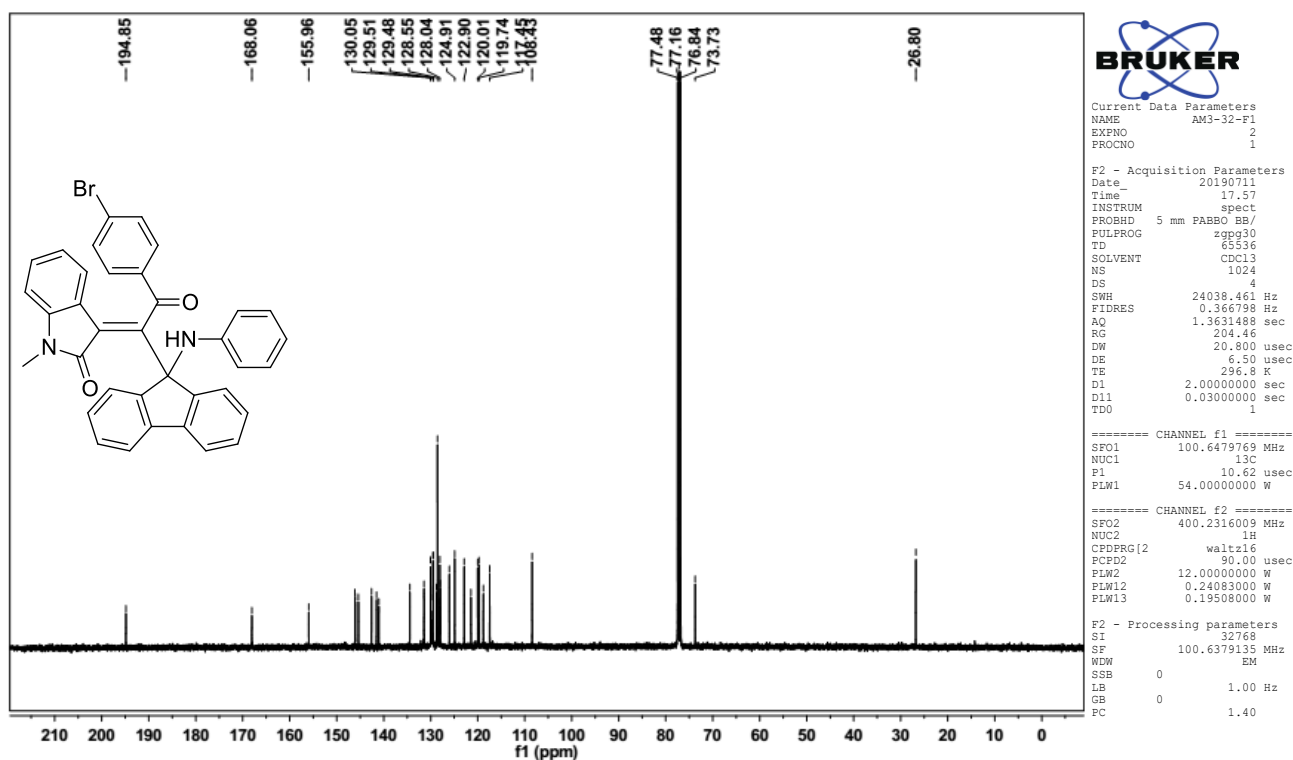

**<sup>13</sup>C NMR Spectrum of compound 3n**

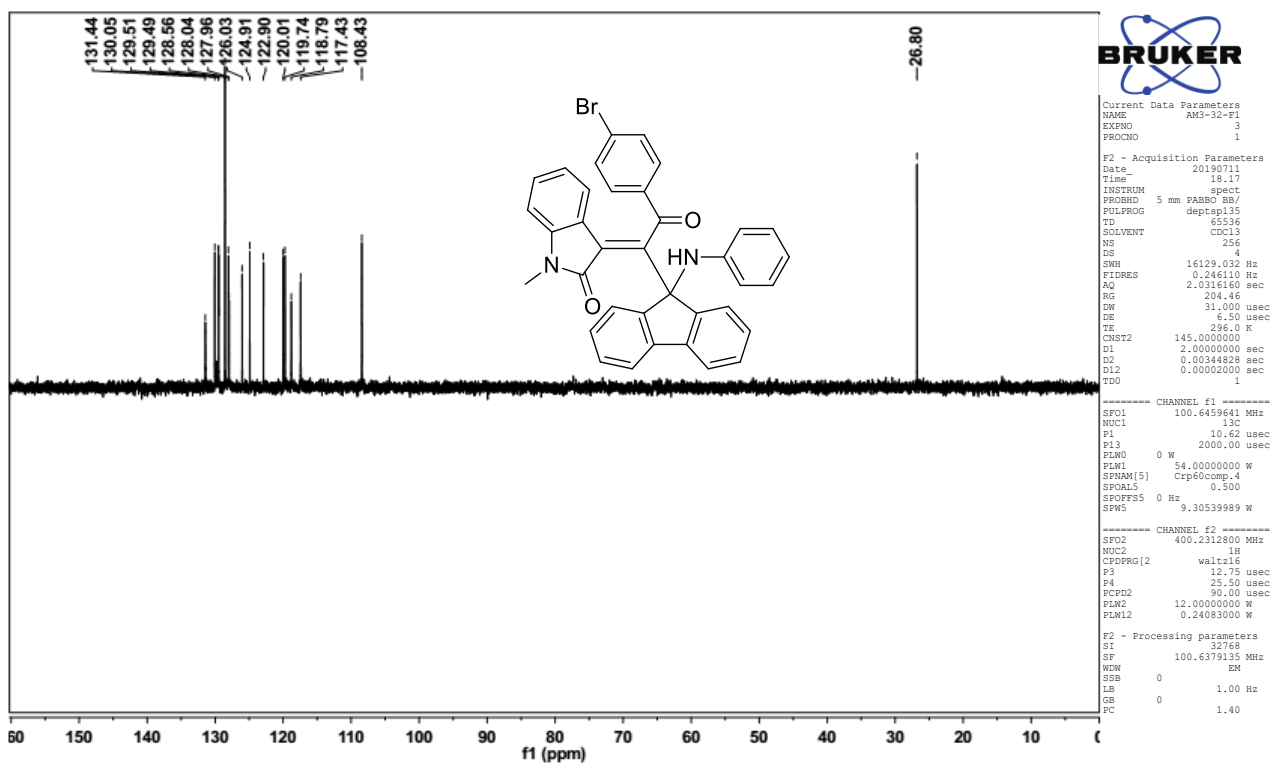

DEPT- 135 Spectrum of compound **3n**

AM3-32F1 #80 RT: 1.33 AV: 1 NL: 5.81E6  
 T: FTMS (1,1) + p ESI Full ms [100.00-1500.00]

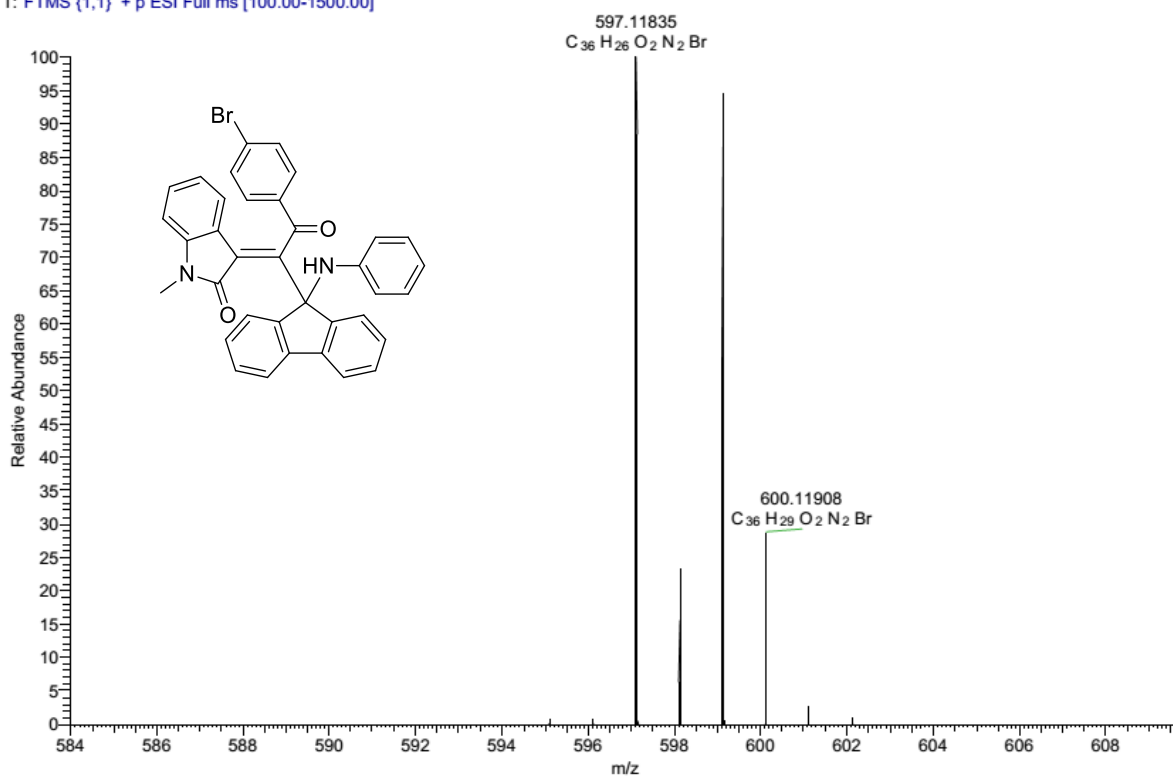

HRMS Spectrum of Compound **3n**

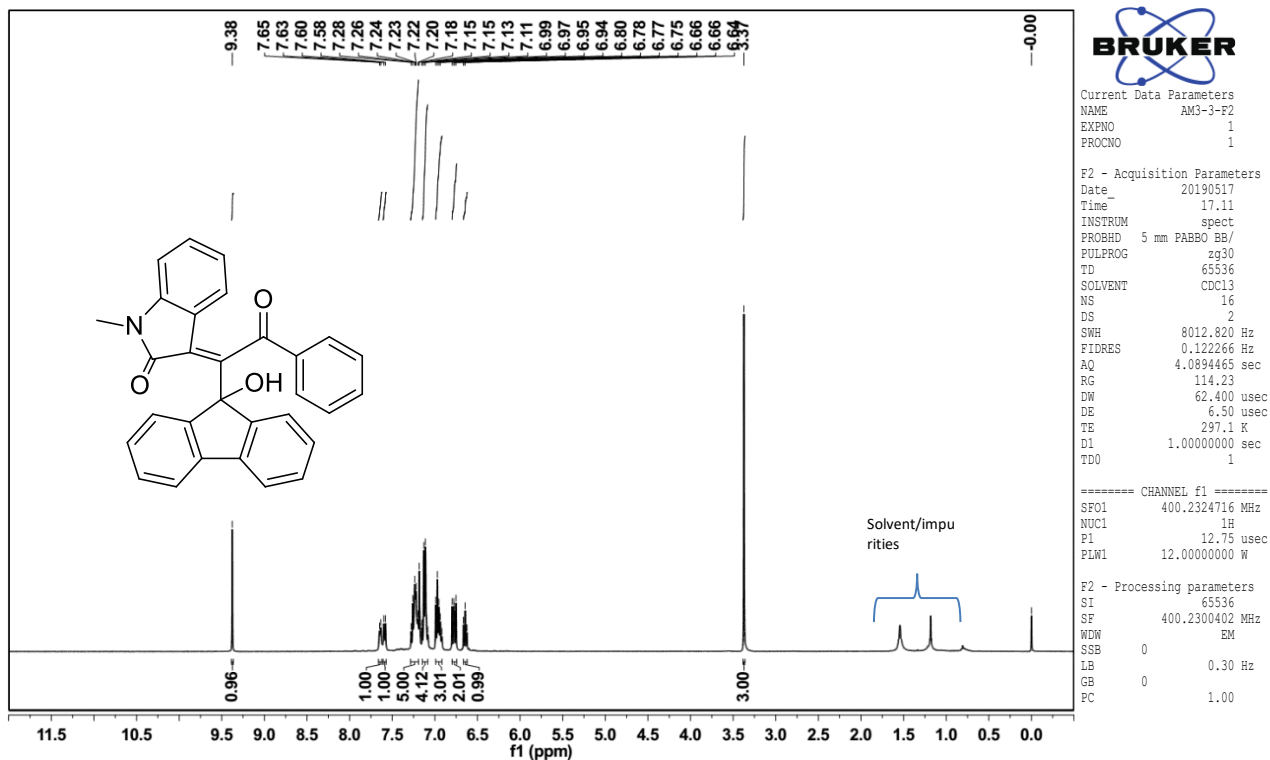

<sup>1</sup>H NMR spectrum of compound 4a

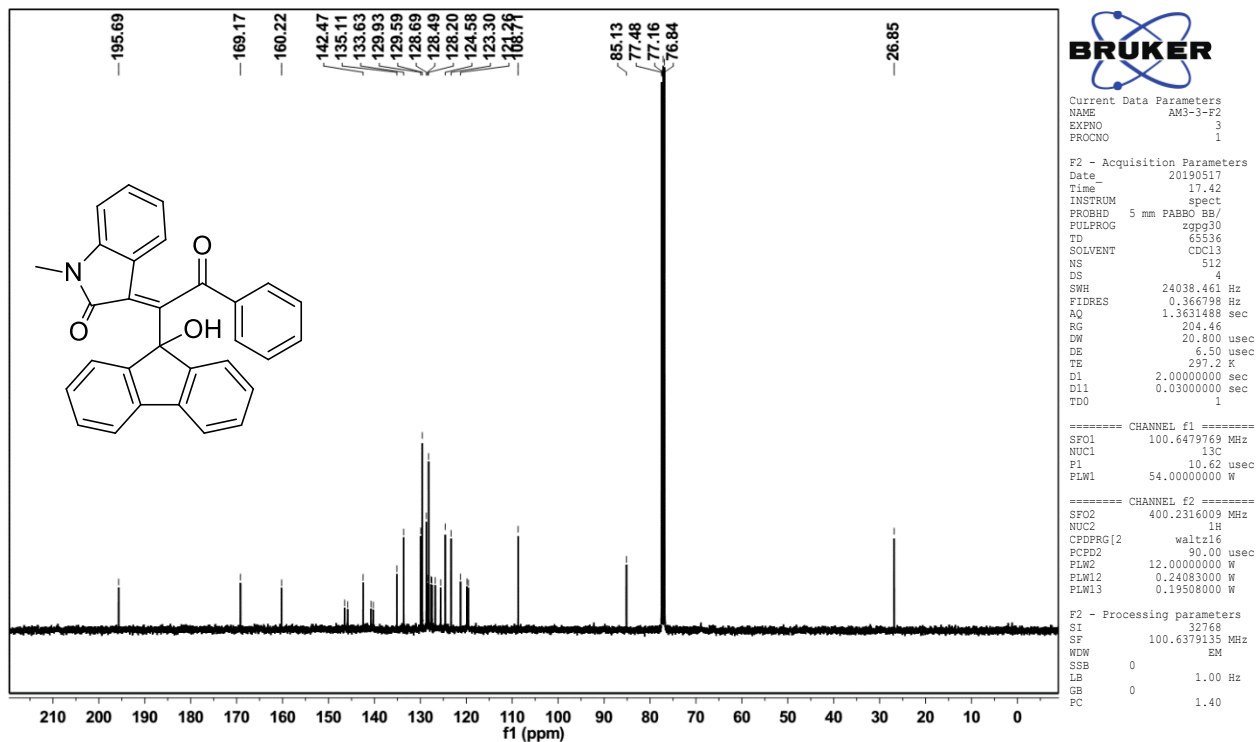

<sup>13</sup>C NMR Spectrum of compound 4a

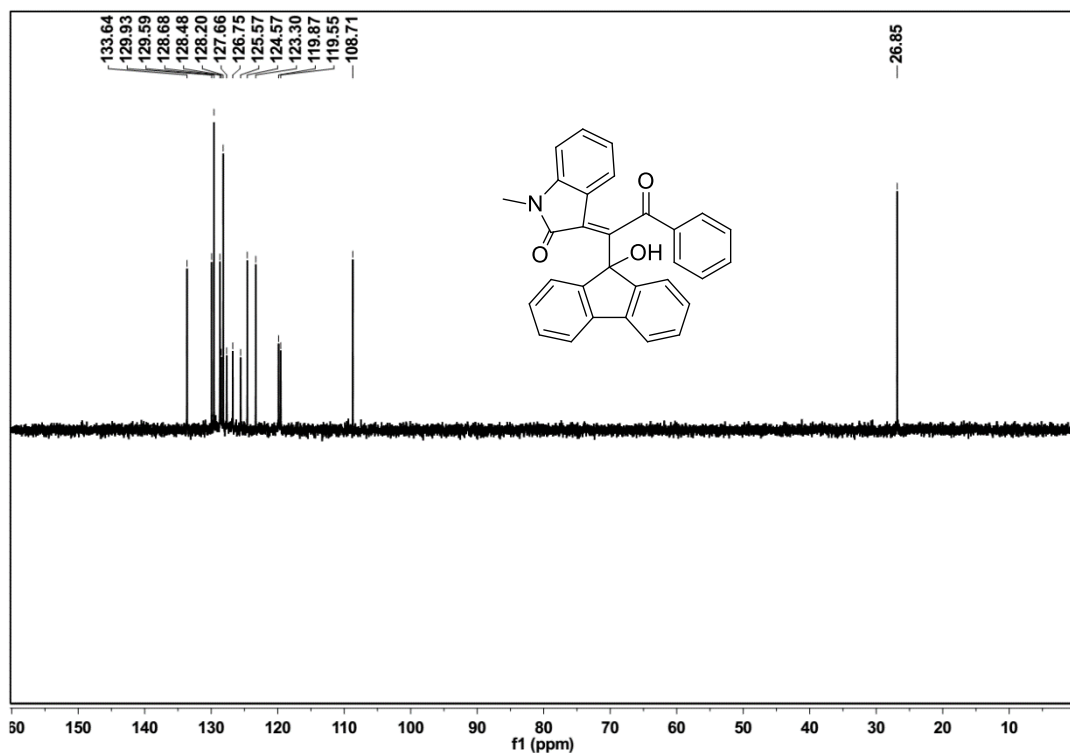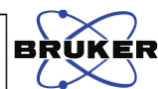

Current Data Parameters  
NAME AM3-3F2  
EXPNO 4  
PROCNO 1

F2 - Acquisition Parameters  
Date\_ 20190517  
Time\_ 18.01  
INSTRUM spect  
PROBHD 5 mm PABBO BB  
PULPROG zgpg30  
TD 65536  
SOLVENT CDCl3  
NS 256  
DS 4  
SWH 16129.032 Hz  
FIDRES 0.246110 Hz  
AQ 2.0316160 sec  
RG 204.46  
SW 31.000 usec  
DE 6.50 usec  
TE 297.0 K  
CNST1 145.000000  
D1 2.0000000 sec  
D2 0.0034828 sec  
D12 0.0002000 sec  
TDO 1

----- CHANNEL f1 -----  
SFO1 100.6459641 MHz  
NUC1 13C  
P1 10.62 usec  
PL1 2000.00 usec  
PCMO 0 W  
PLM1 54.0000000 W  
SFO1S5 Crp60comp\_4  
SFO1S5 0 Hz  
SFO1S5 9.30539989 W

----- CHANNEL f2 -----  
SFO2 400.2312800 MHz  
NUC2 1H  
CPDPRG2 waltz16  
F3 12.75 usec  
F4 25.50 usec  
PCPD2 90.00 usec  
PLM2 12.0000000 W  
PLM2 0.24083000 W

F2 - Processing parameters  
SI 32768  
SF 100.6379135 MHz  
WDW EN  
SSB 0  
LB 1.00 Hz  
GB 0  
PC 1.40

DEPT- 135 Spectrum of compound 4a

AM-3-3F2 #86 RT: 1.43 AV: 1 NL: 8.61E5  
T: FTMS {1,1} + p ESI Full ms [100.00-1500.00]

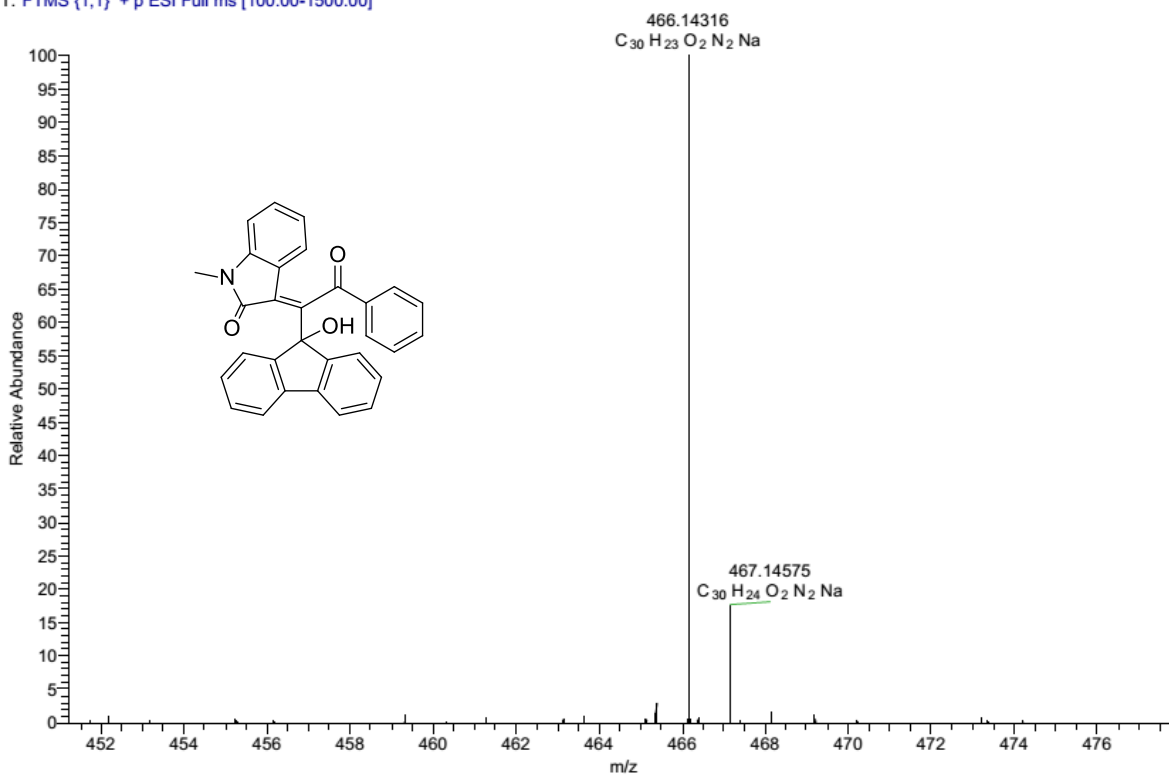

HRMS Spectrum of Compound 4a

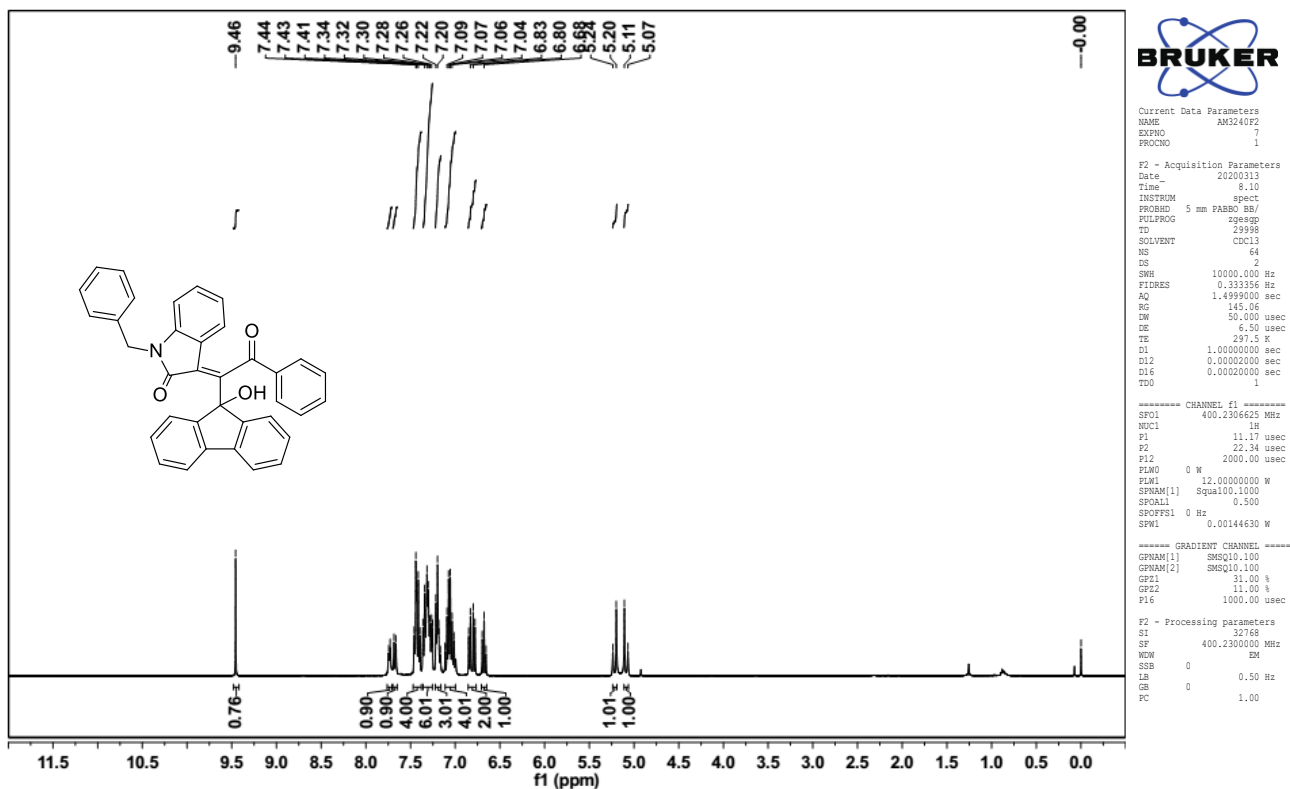

**<sup>1</sup>H NMR spectrum of compound 4b**

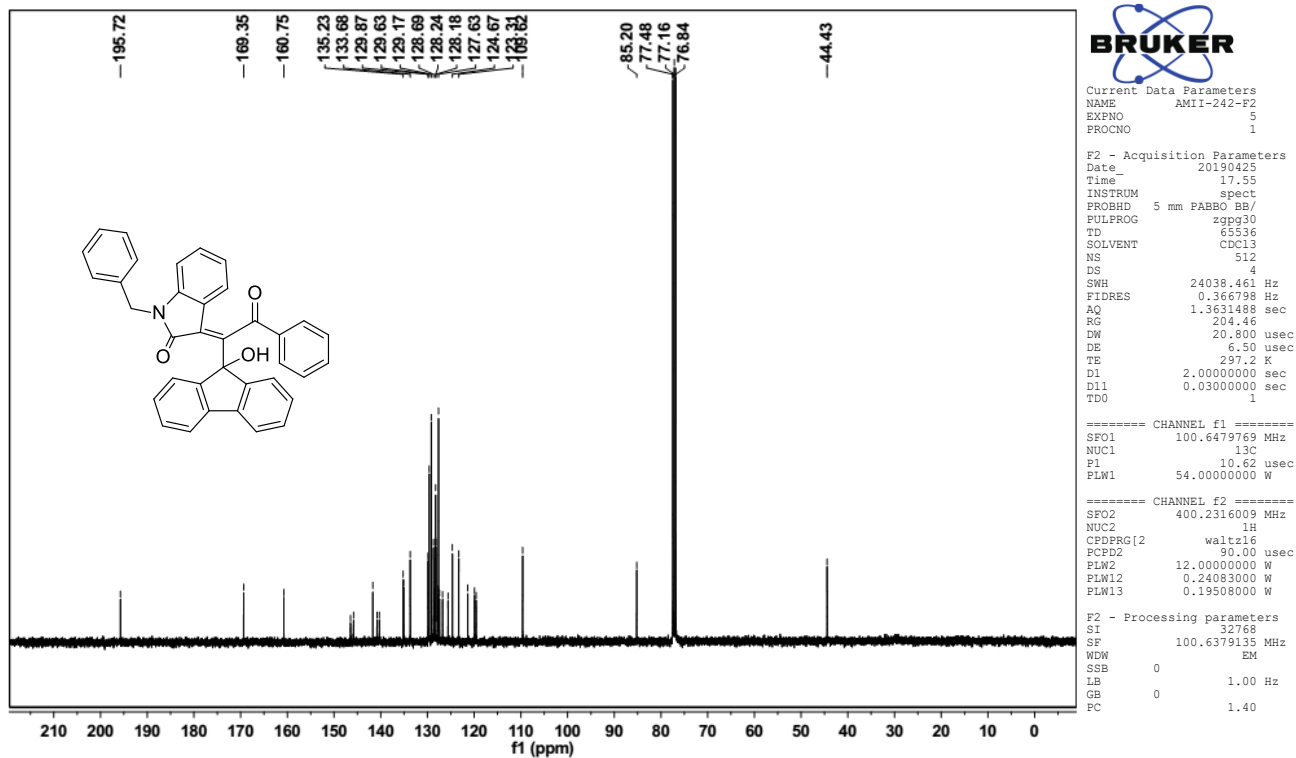

**<sup>13</sup>C NMR Spectrum of compound 4b**



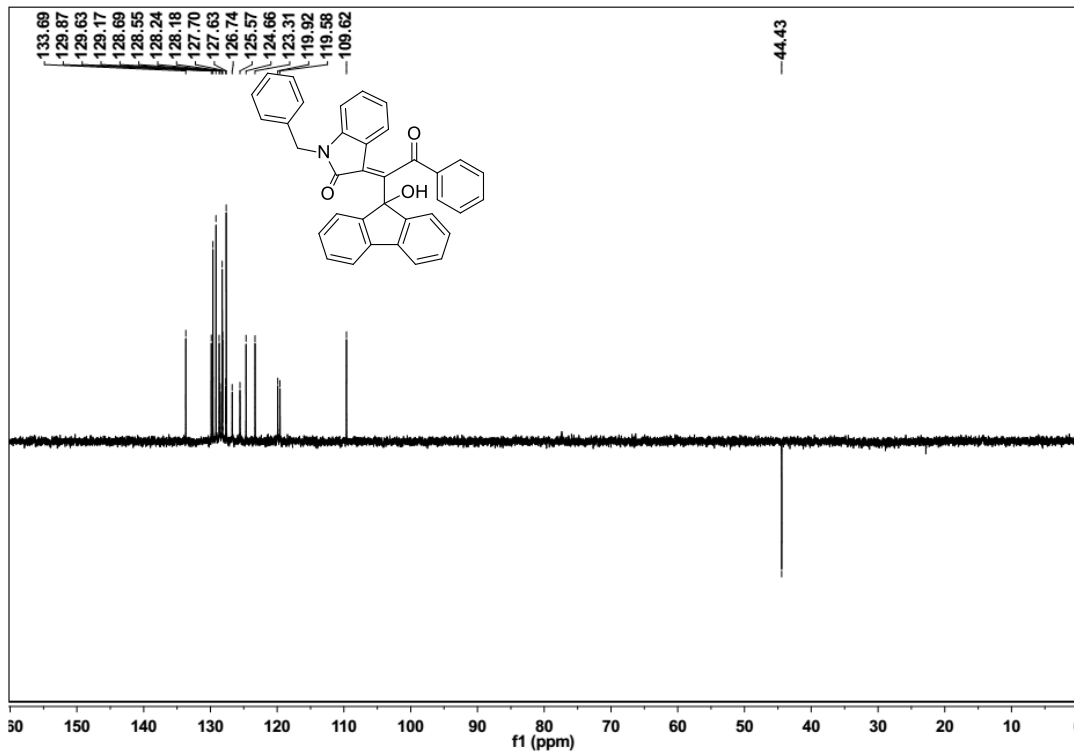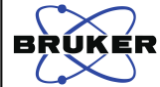

Current Data Parameters  
 NAME AMI1-242-F2  
 EXPNO 6  
 PROCNO 1

F2 - Acquisition Parameters  
 Date\_ 20190425  
 Time 19.14  
 INSTRUM spect  
 PROBHD 5 mm F4BBO BB/  
 PULPROG zgpg30  
 TD 65536  
 SOLVENT CDCl3  
 NS 256  
 DS 4  
 SWH 16129.032 Hz  
 FIDRES 0.246110 Hz  
 AQ 2.0316160 sec  
 RG 204.46  
 DW 31.000 usec  
 DE 6.50 usec  
 TE 296.6 K  
 CNST2 145.000000  
 D1 2.00000000 sec  
 D2 0.00348223 sec  
 D12 0.00002000 sec  
 TDO 1

----- CHANNEL f1 -----  
 SFO1 100.6459641 MHz  
 NUC1 13C  
 P1 10.62 usec  
 PL1 2000.00 usec  
 PLW0 0 W  
 PLW1 54.00000000 W  
 SRM[5] Crp60comp.4  
 SFOAL5 0 Hz  
 SFOFF5 0 Hz  
 SWH 9.30539989 W

----- CHANNEL f2 -----  
 SFO2 400.2312800 MHz  
 NUC2 1H  
 CPOPRG[2] waltz16  
 P3 12.75 usec  
 P4 25.50 usec  
 PCPD2 90.00 usec  
 PLW2 12.00000000 W  
 PLW12 0.24083000 W

F2 - Processing parameters  
 SI 32768  
 SF 100.6379135 MHz  
 WDW EM  
 SSB 0  
 LB 1.00 Hz  
 GB 0  
 PC 1.40

DEPT- 135 Spectrum of compound 4b

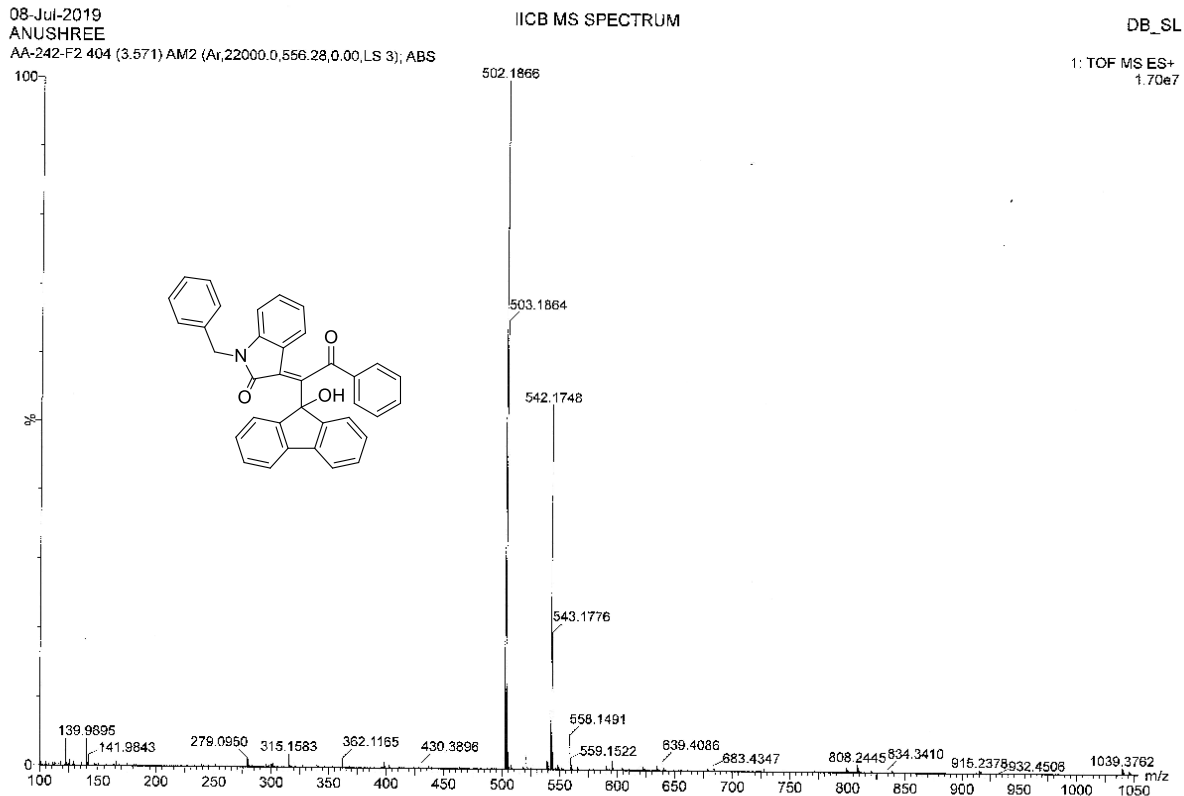

HRMS Spectrum of Compound 4b

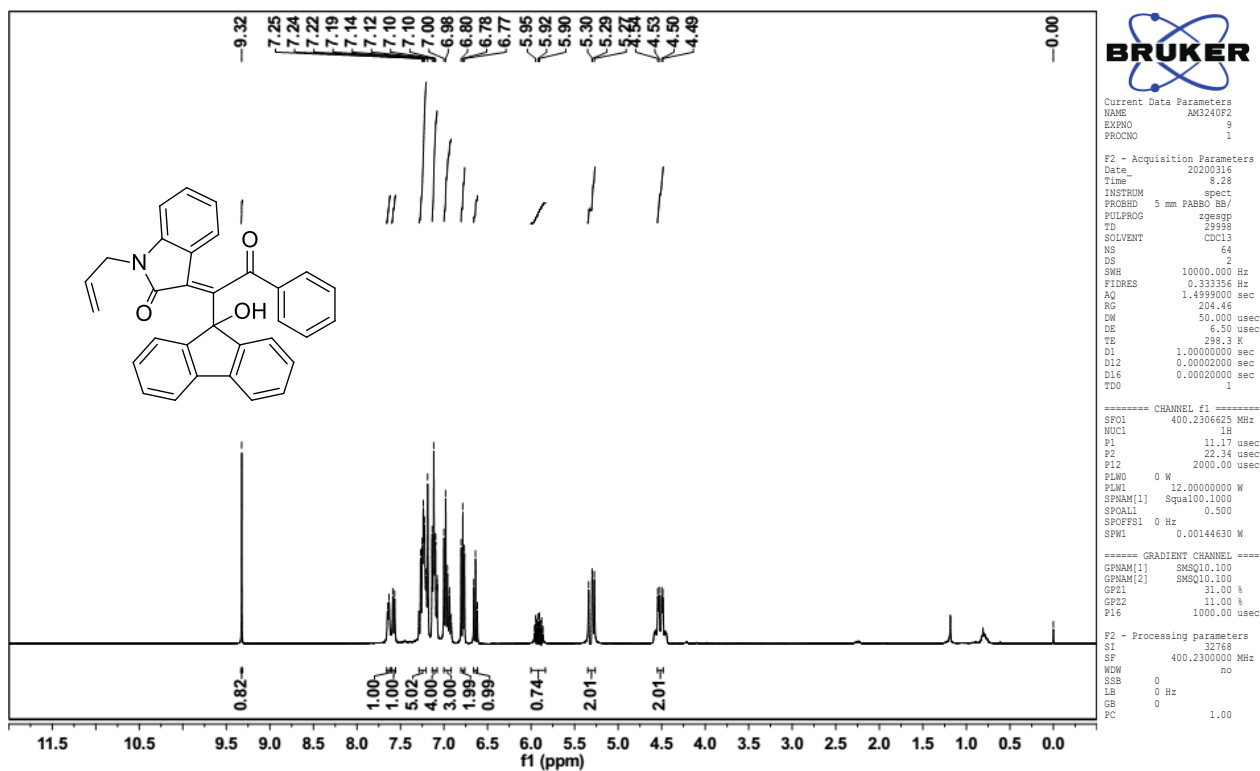

**<sup>1</sup>H NMR spectrum of compound 4c**

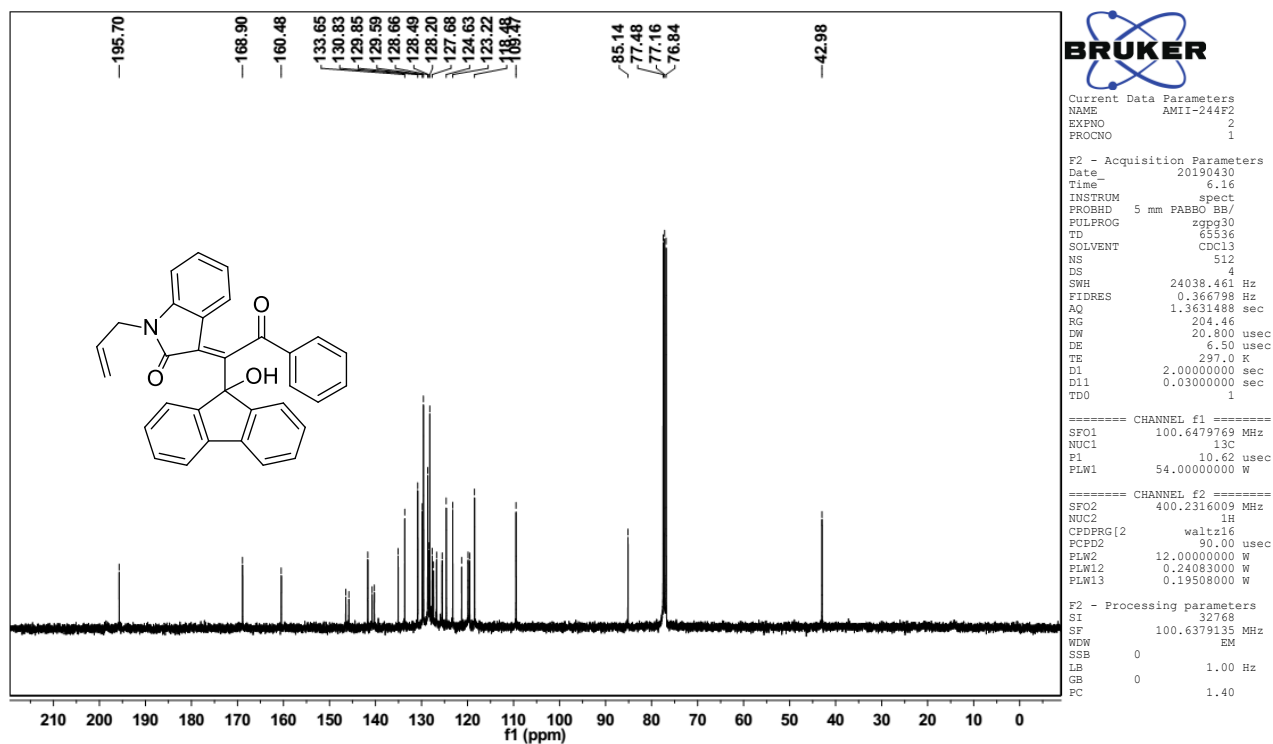

**<sup>13</sup>C NMR Spectrum of compound 4c**

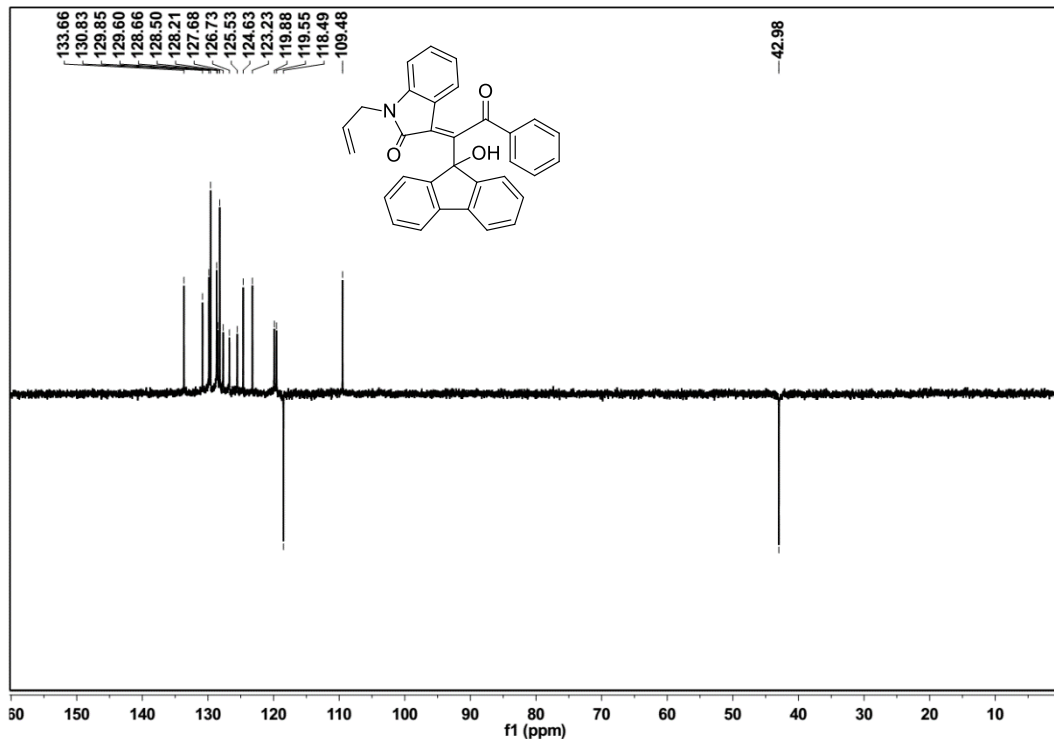

DEPT- 135 Spectrum of compound 4c

11-Jul-2019

IICB MS SPECTRUM

DB\_SL\_SC

AA\_244\_F2 381 (3.374) AM2 (Ar.22000.0,556.28,0.00,LS 3): ABS

1: TOF MS ES+  
6.87e6

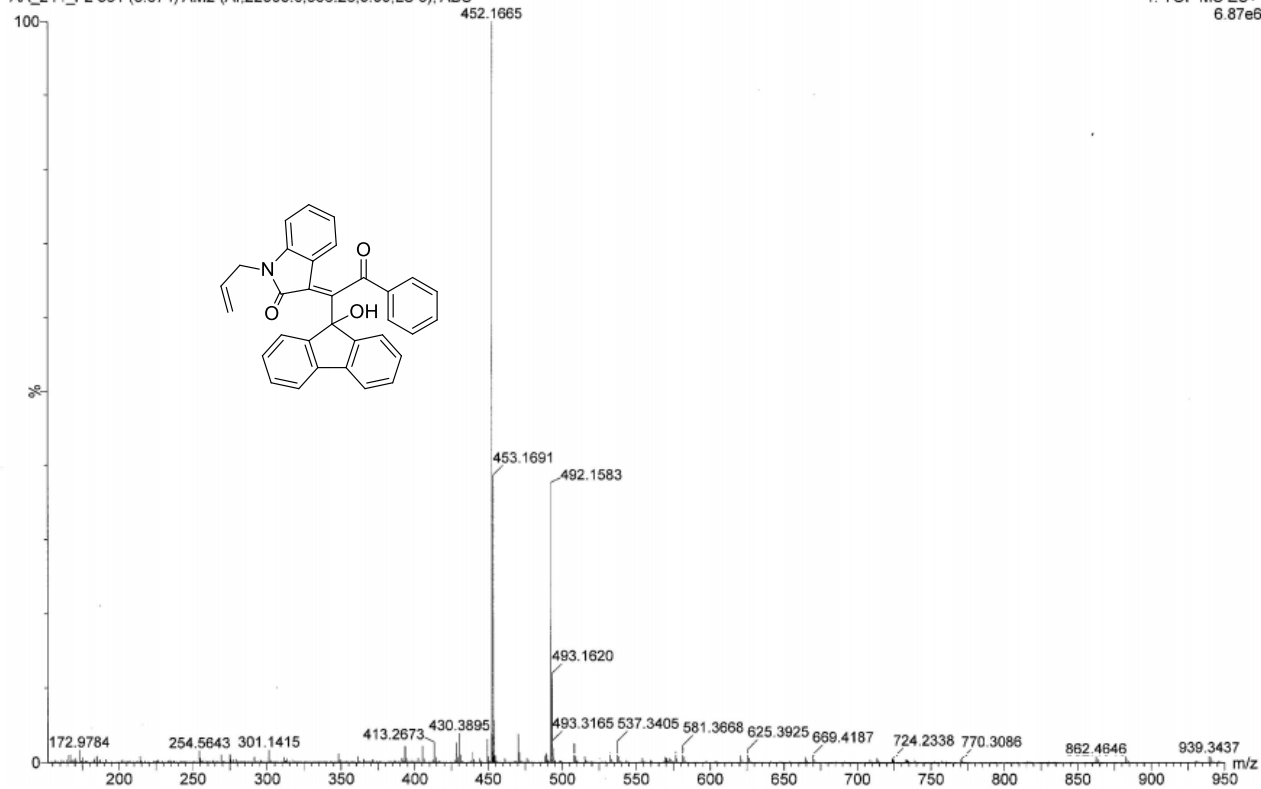

HRMS Spectrum of compound 4c

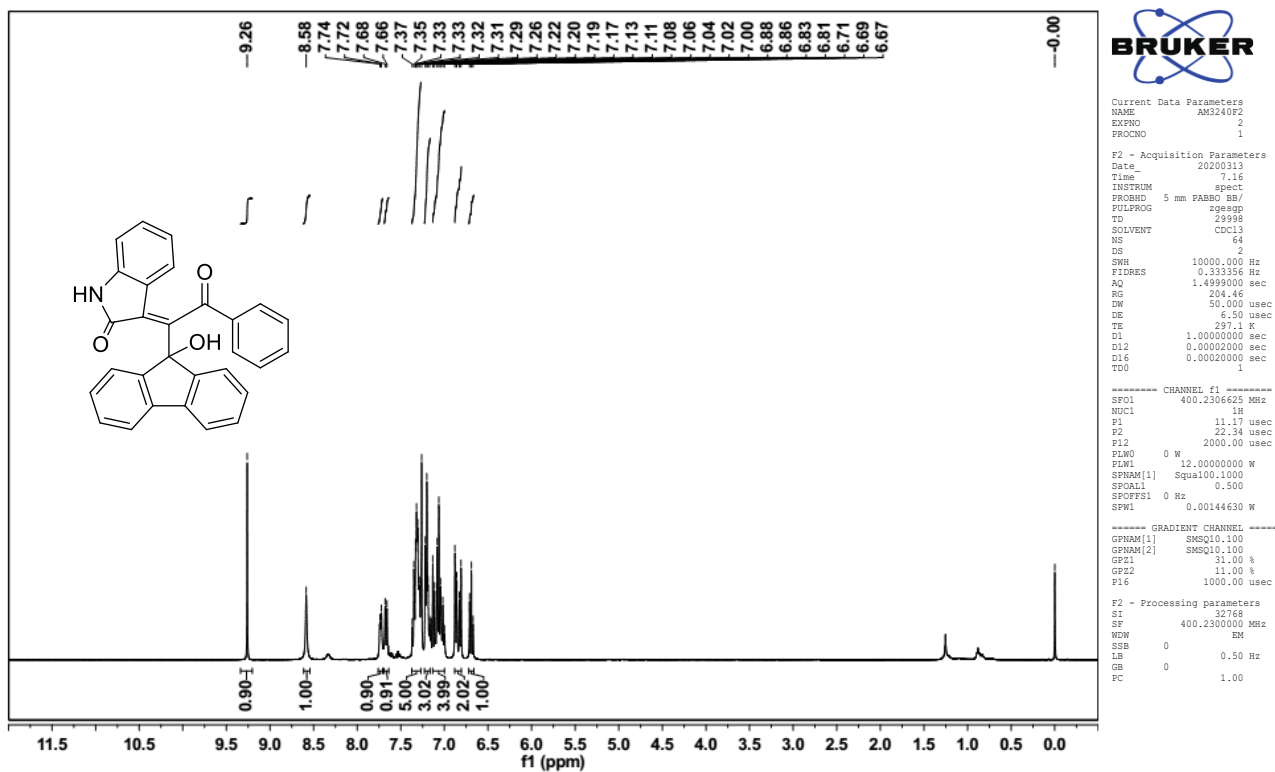

<sup>1</sup>H NMR spectrum of compound **4d**

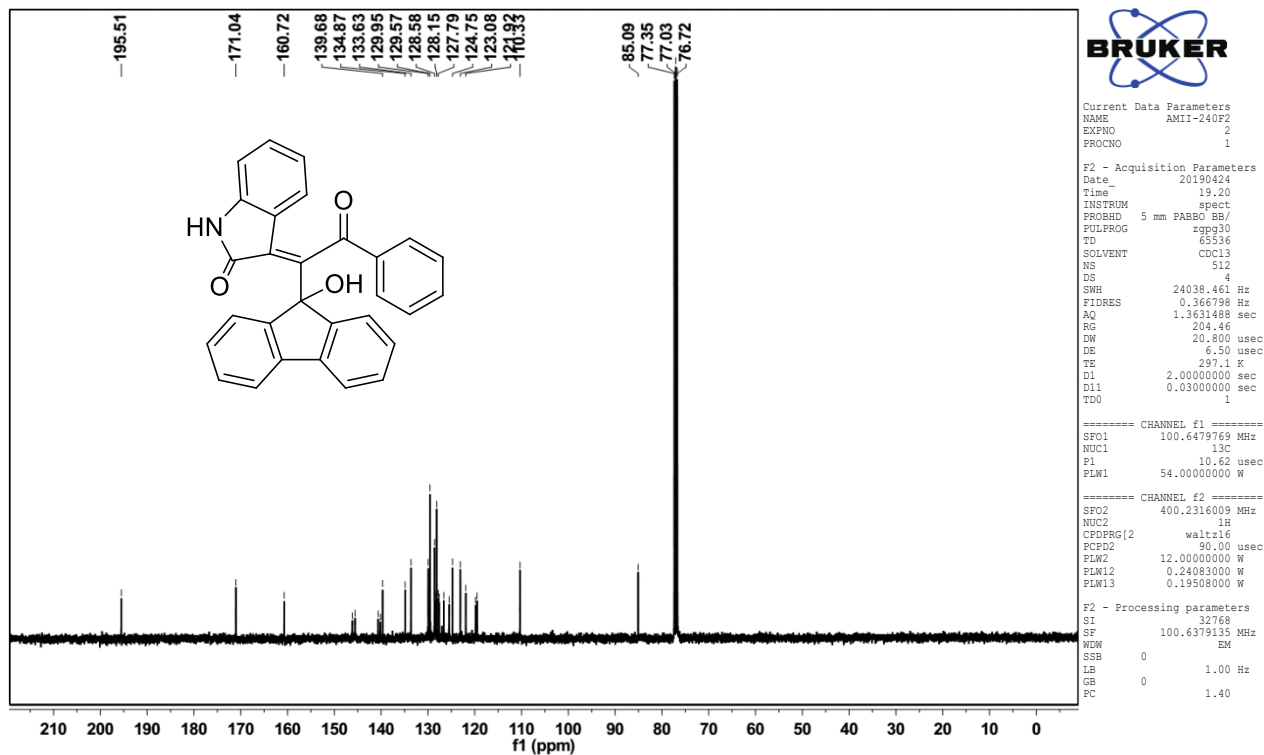

<sup>13</sup>C NMR Spectrum of compound **4d**

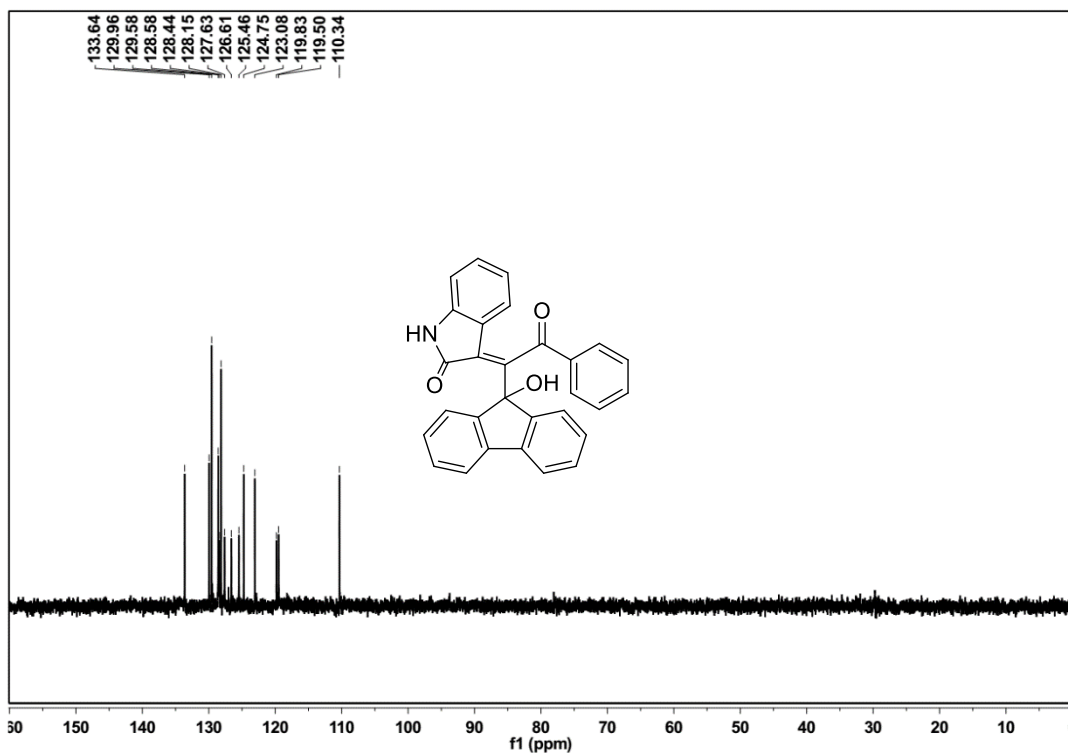

DEPT- 135 Spectrum of compound 4d

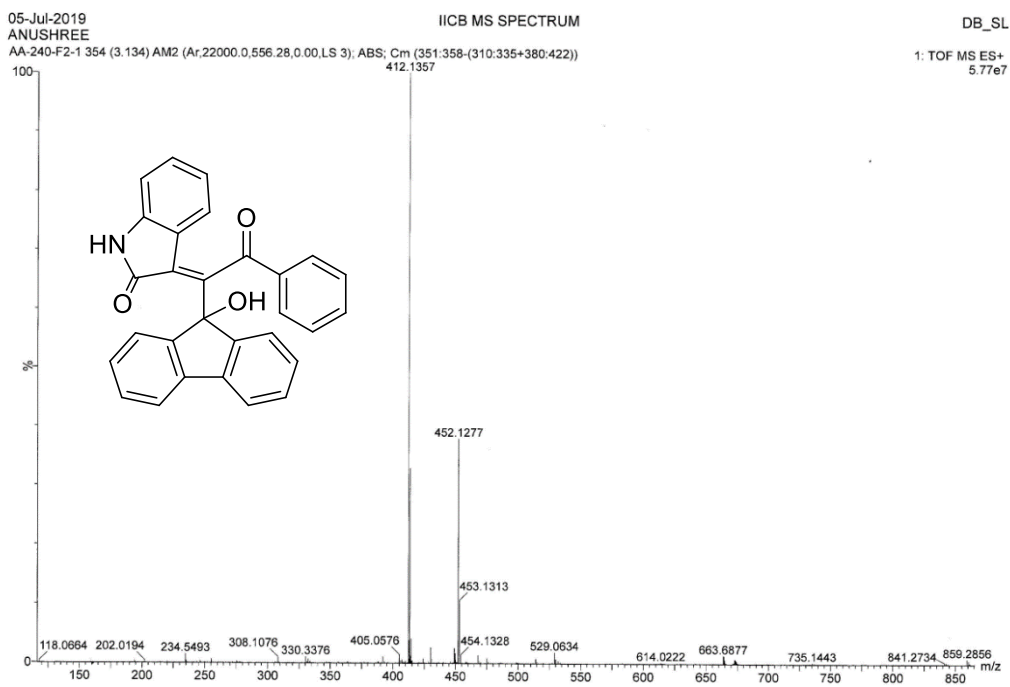

HRMS Spectrum of Compound 4d

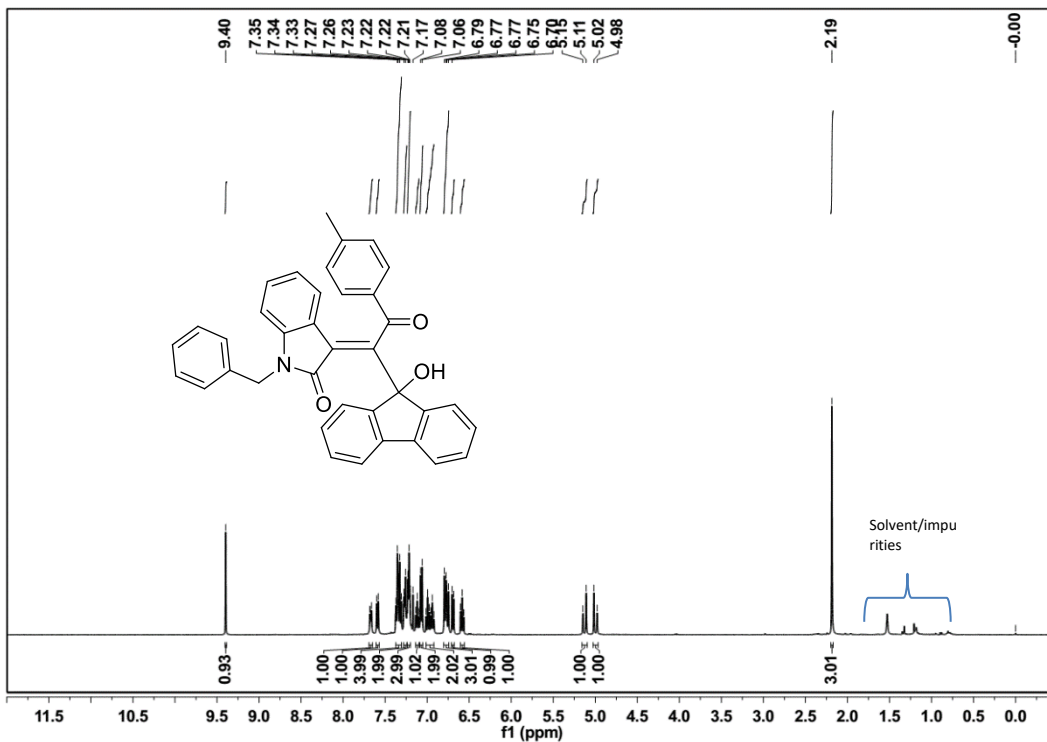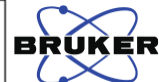

Current Data Parameters  
 NAME AM3-26 F2  
 EXPNO 4  
 PROCNO 1

F2 - Acquisition Parameters  
 Date\_ 20190713  
 Time\_ 19.28  
 INSTRUM spect  
 PROBHD 5 mm PABBO BB/  
 PULPROG zg30  
 TD 65536  
 SOLVENT CDC13  
 NS 16  
 DS 2  
 SWH 8012.820 Hz  
 FIDRES 0.122266 Hz  
 AQ 4.089465 sec  
 RG 79.6  
 DW 62.400 usec  
 DE 6.50 usec  
 TE 296.8 K  
 D1 1.00000000 sec  
 TDO 1

==== CHANNEL f1 =====  
 SF01 400.2324716 MHz  
 NUC1 1H  
 P1 12.75 usec  
 PLW1 12.00000000 W

F2 - Processing parameters  
 SI 65536  
 SF 400.2300463 MHz  
 WDW EM  
 SSB 0  
 LB 0.30 Hz  
 GB 0  
 PC 1.00

<sup>1</sup> H NMR Spectrum of compound 4e

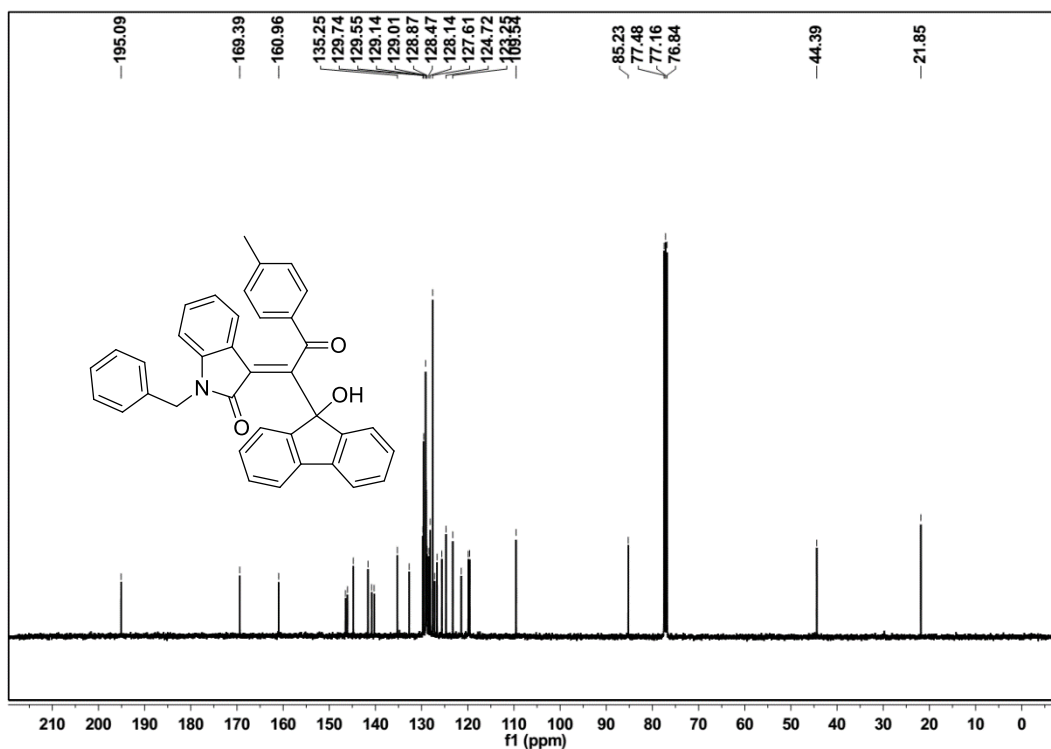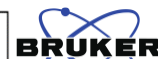

Current Data Parameters  
 NAME AM3-26 F2  
 EXPNO 5  
 PROCNO 1

F2 - Acquisition Parameters  
 Date\_ 20190713  
 Time\_ 19.59  
 INSTRUM spect  
 PROBHD 5 mm PABBO BB/  
 PULPROG zgpg30  
 TD 65536  
 SOLVENT CDC13  
 NS 512  
 DS 4  
 SWH 24038.461 Hz  
 FIDRES 0.366798 Hz  
 AQ 1.3631488 sec  
 RG 204.46  
 DW 20.800 usec  
 DE 6.50 usec  
 TE 297.9 K  
 D1 2.00000000 sec  
 D11 0.03000000 sec  
 TDO 1

==== CHANNEL f1 =====  
 SF01 100.6479769 MHz  
 NUC1 13C  
 P1 10.62 usec  
 PLW1 54.00000000 W

==== CHANNEL f2 =====  
 SF02 400.2316009 MHz  
 NUC2 1H  
 CPDPRG2 waltz16  
 PCPD2 90.00 usec  
 PLW2 12.00000000 W  
 PLW12 0.24083000 W  
 PLW13 0.19508000 W

F2 - Processing parameters  
 SI 32768  
 SF 100.6379135 MHz  
 WDW EM  
 SSB 0  
 LB 1.00 Hz  
 GB 0  
 PC 1.40

<sup>13</sup> C NMR Spectrum of compound 4e

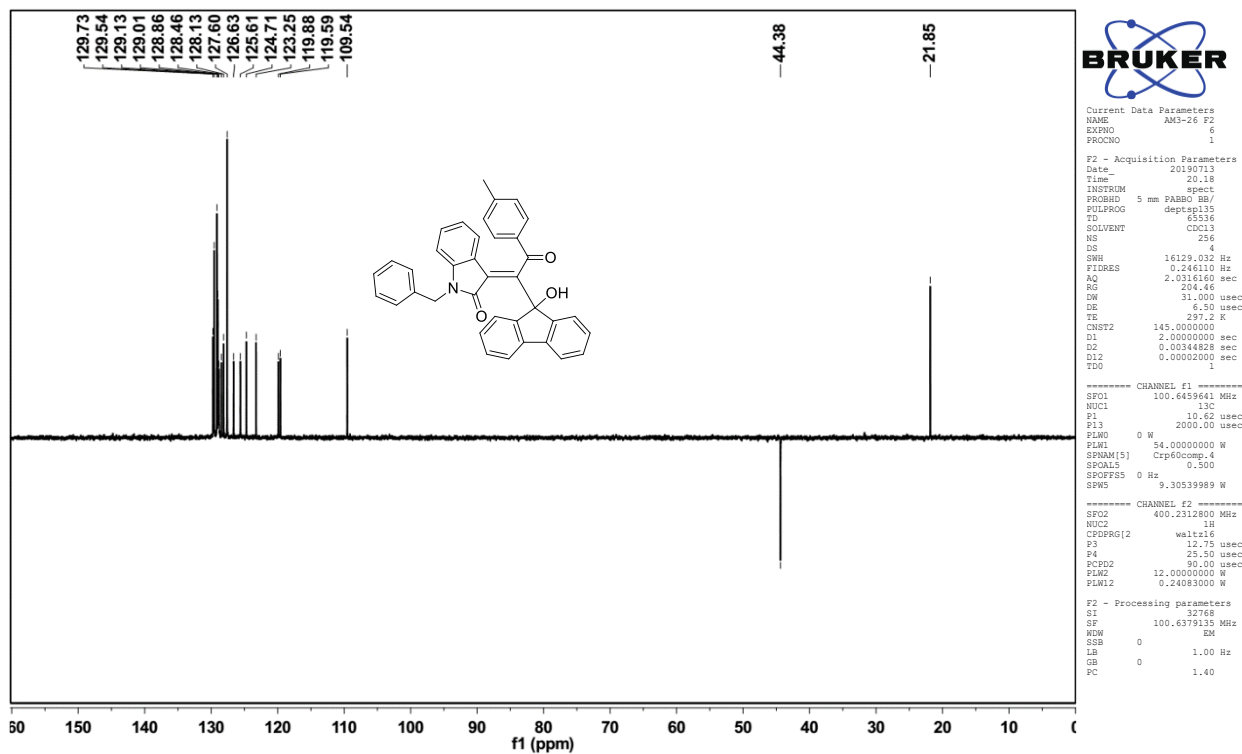

AM3-26F2 #81 RT: 1.15 AV: 1 NL: 1.72E6  
 T: FTMS {1,1} + p ESI Full ms [100.00-1500.00]

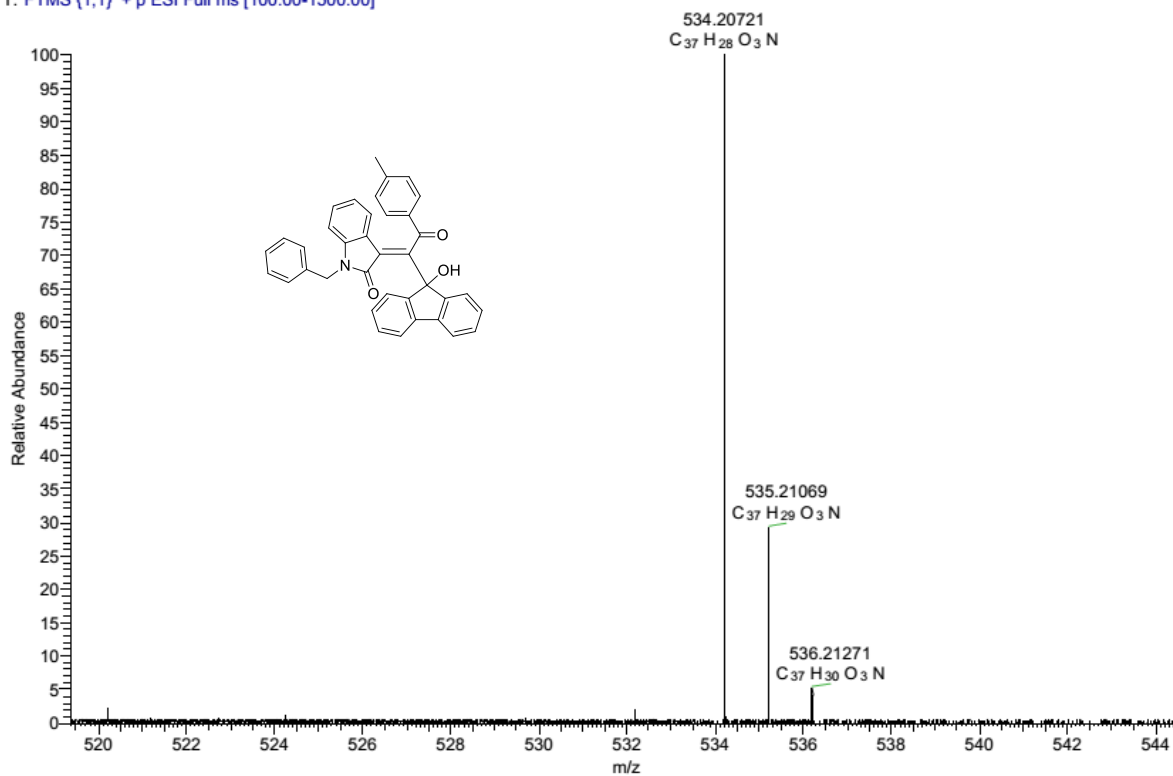

Table 1. Crystal data and structure refinement for **3a**

|                                   |                                                               |                  |
|-----------------------------------|---------------------------------------------------------------|------------------|
| Identification code               | <b>3a</b>                                                     |                  |
| Empirical formula                 | C <sub>37</sub> H <sub>28</sub> N <sub>2</sub> O <sub>2</sub> |                  |
| Formula weight                    | 532.61                                                        |                  |
| Temperature                       | 296(2) K                                                      |                  |
| Wavelength                        | 1.54184 Å                                                     |                  |
| Crystal system                    | Monoclinic                                                    |                  |
| Space group                       | P2 <sub>1</sub> /n                                            |                  |
| Unit cell dimensions              | a = 11.867(3) Å                                               | α = 90°.         |
|                                   | b = 12.900(3) Å                                               | β = 98.427(17)°. |
|                                   | c = 18.148(6) Å                                               | γ = 90°.         |
| Volume                            | 2748.3(12) Å <sup>3</sup>                                     |                  |
| Z                                 | 4                                                             |                  |
| Density (calculated)              | 1.287 Mg/m <sup>3</sup>                                       |                  |
| Absorption coefficient            | 0.626 mm <sup>-1</sup>                                        |                  |
| F(000)                            | 1120                                                          |                  |
| Crystal size                      | 0.150 x 0.150 x 0.100 mm <sup>3</sup>                         |                  |
| Theta range for data collection   | 4.187 to 69.999°.                                             |                  |
| Index ranges                      | -14 ≤ h ≤ 14, -15 ≤ k ≤ 15, -22 ≤ l ≤ 22                      |                  |
| Reflections collected             | 33648                                                         |                  |
| Independent reflections           | 5186 [R(int) = 0.0807]                                        |                  |
| Completeness to theta = 67.684°   | 99.5 %                                                        |                  |
| Absorption correction             | Semi-empirical from equivalents                               |                  |
| Max. and min. transmission        | 0.7536 and 0.6903                                             |                  |
| Refinement method                 | Full-matrix least-squares on F <sup>2</sup>                   |                  |
| Data / restraints / parameters    | 5186 / 0 / 377                                                |                  |
| Goodness-of-fit on F <sup>2</sup> | 1.093                                                         |                  |
| Final R indices [I > 2σ(I)]       | R1 = 0.0643, wR2 = 0.1688                                     |                  |
| R indices (all data)              | R1 = 0.0982, wR2 = 0.1986                                     |                  |
| Extinction coefficient            | 0.0096(8)                                                     |                  |
| Largest diff. peak and hole       | 0.190 and -0.172 e.Å <sup>-3</sup>                            |                  |



Table 2. Atomic coordinates ( $\times 10^4$ ) and equivalent isotropic displacement parameters ( $\text{\AA}^2 \times 10^3$ ) for AM.  $U(\text{eq})$  is defined as one third of the trace of the orthogonalized  $U^{ij}$  tensor.

|       | x       | y        | z       | U(eq)  |
|-------|---------|----------|---------|--------|
| C(1)  | 3860(2) | 4442(3)  | 3639(2) | 81(1)  |
| C(2)  | 3321(3) | 3738(3)  | 3131(2) | 89(1)  |
| C(3)  | 3900(3) | 3146(3)  | 2685(2) | 78(1)  |
| C(4)  | 5067(3) | 3282(3)  | 2772(2) | 81(1)  |
| C(5)  | 5626(2) | 3979(2)  | 3287(2) | 76(1)  |
| C(6)  | 5025(2) | 4581(2)  | 3725(2) | 60(1)  |
| C(7)  | 6370(2) | 6037(2)  | 4068(1) | 53(1)  |
| C(8)  | 7524(2) | 5527(2)  | 4013(2) | 56(1)  |
| C(9)  | 8118(2) | 4833(2)  | 4504(2) | 69(1)  |
| C(10) | 9165(3) | 4498(3)  | 4359(2) | 83(1)  |
| C(11) | 9607(2) | 4851(3)  | 3754(2) | 86(1)  |
| C(12) | 9005(2) | 5522(2)  | 3243(2) | 77(1)  |
| C(13) | 7934(2) | 5853(2)  | 3382(2) | 60(1)  |
| C(14) | 7056(2) | 6471(2)  | 2927(1) | 60(1)  |
| C(15) | 7033(3) | 6917(2)  | 2228(2) | 77(1)  |
| C(16) | 6054(4) | 7386(3)  | 1898(2) | 90(1)  |
| C(17) | 5100(3) | 7417(3)  | 2245(2) | 87(1)  |
| C(18) | 5116(3) | 7002(2)  | 2955(2) | 70(1)  |
| C(19) | 6103(2) | 6533(2)  | 3292(1) | 56(1)  |
| C(20) | 7664(2) | 8604(2)  | 3883(2) | 63(1)  |
| C(21) | 8146(3) | 9377(2)  | 3512(2) | 79(1)  |
| C(22) | 9274(3) | 9614(3)  | 3703(2) | 93(1)  |
| C(23) | 9924(3) | 9079(3)  | 4269(3) | 105(1) |
| C(24) | 9455(3) | 8302(3)  | 4645(2) | 84(1)  |
| C(25) | 8309(2) | 8054(2)  | 4450(2) | 61(1)  |
| C(26) | 7813(2) | 7227(2)  | 4876(2) | 58(1)  |
| C(27) | 6574(2) | 6926(2)  | 4648(1) | 57(1)  |
| C(28) | 5818(2) | 7490(2)  | 4975(2) | 62(1)  |
| C(29) | 6069(3) | 8362(2)  | 5507(2) | 68(1)  |
| C(30) | 7041(3) | 8793(3)  | 5902(2) | 83(1)  |
| C(31) | 6967(4) | 9629(3)  | 6373(2) | 102(1) |
| C(32) | 5925(4) | 10038(3) | 6460(2) | 110(1) |
| C(33) | 4942(4) | 9614(3)  | 6090(2) | 102(1) |

|       |         |         |         |        |
|-------|---------|---------|---------|--------|
| C(34) | 5016(3) | 8770(3) | 5626(2) | 79(1)  |
| C(35) | 2924(3) | 8409(4) | 5199(2) | 112(1) |
| C(36) | 4535(3) | 7426(3) | 4826(2) | 69(1)  |
| C(37) | 3310(3) | 2399(3) | 2122(2) | 103(1) |
| N(1)  | 5543(2) | 5290(2) | 4272(1) | 63(1)  |
| N(2)  | 4133(2) | 8218(2) | 5214(2) | 81(1)  |
| O(1)  | 8365(2) | 6811(2) | 5416(1) | 70(1)  |
| O(2)  | 3915(2) | 6823(2) | 4434(1) | 83(1)  |

Table 3. Bond lengths [ $\text{\AA}$ ] and angles [ $^\circ$ ] for AM.

|             |          |
|-------------|----------|
| C(1)-C(6)   | 1.380(4) |
| C(1)-C(2)   | 1.383(5) |
| C(1)-H(1)   | 0.9300   |
| C(2)-C(3)   | 1.369(5) |
| C(2)-H(2)   | 0.9300   |
| C(3)-C(4)   | 1.382(4) |
| C(3)-C(37)  | 1.502(5) |
| C(4)-C(5)   | 1.392(4) |
| C(4)-H(4)   | 0.9300   |
| C(5)-C(6)   | 1.381(4) |
| C(5)-H(5)   | 0.9300   |
| C(6)-N(1)   | 1.421(4) |
| C(7)-N(1)   | 1.461(3) |
| C(7)-C(8)   | 1.536(3) |
| C(7)-C(19)  | 1.537(3) |
| C(7)-C(27)  | 1.552(4) |
| C(8)-C(13)  | 1.375(4) |
| C(8)-C(9)   | 1.381(4) |
| C(9)-C(10)  | 1.377(4) |
| C(9)-H(9)   | 0.9300   |
| C(10)-C(11) | 1.364(5) |
| C(10)-H(10) | 0.9300   |
| C(11)-C(12) | 1.387(5) |
| C(11)-H(11) | 0.9300   |
| C(12)-C(13) | 1.398(4) |
| C(12)-H(12) | 0.9300   |
| C(13)-C(14) | 1.467(4) |
| C(14)-C(15) | 1.390(4) |

|             |          |
|-------------|----------|
| C(14)-C(19) | 1.393(3) |
| C(15)-C(16) | 1.367(5) |
| C(15)-H(15) | 0.9300   |
| C(16)-C(17) | 1.375(5) |
| C(16)-H(16) | 0.9300   |
| C(17)-C(18) | 1.393(4) |
| C(17)-H(17) | 0.9300   |
| C(18)-C(19) | 1.379(3) |
| C(18)-H(18) | 0.9300   |
| C(20)-C(21) | 1.374(4) |
| C(20)-C(25) | 1.385(4) |
| C(20)-H(20) | 0.9300   |
| C(21)-C(22) | 1.367(4) |
| C(21)-H(21) | 0.9300   |
| C(22)-C(23) | 1.377(5) |
| C(22)-H(22) | 0.9300   |
| C(23)-C(24) | 1.374(5) |
| C(23)-H(23) | 0.9300   |
| C(24)-C(25) | 1.391(4) |
| C(24)-H(24) | 0.9300   |
| C(25)-C(26) | 1.489(4) |
| C(26)-O(1)  | 1.220(3) |
| C(26)-C(27) | 1.519(4) |
| C(27)-C(28) | 1.358(4) |
| C(28)-C(29) | 1.484(4) |
| C(28)-C(36) | 1.509(4) |
| C(29)-C(30) | 1.382(4) |
| C(29)-C(34) | 1.402(4) |
| C(30)-C(31) | 1.387(4) |
| C(30)-H(30) | 0.9300   |
| C(31)-C(32) | 1.375(5) |
| C(31)-H(31) | 0.9300   |
| C(32)-C(33) | 1.371(5) |
| C(32)-H(32) | 0.9300   |
| C(33)-C(34) | 1.387(5) |
| C(33)-H(33) | 0.9300   |
| C(34)-N(2)  | 1.391(4) |
| C(35)-N(2)  | 1.453(4) |

|                  |            |
|------------------|------------|
| C(35)-H(35A)     | 0.9600     |
| C(35)-H(35B)     | 0.9600     |
| C(35)-H(35C)     | 0.9600     |
| C(36)-O(2)       | 1.225(4)   |
| C(36)-N(2)       | 1.365(4)   |
| C(37)-H(37A)     | 0.9600     |
| C(37)-H(37B)     | 0.9600     |
| C(37)-H(37C)     | 0.9600     |
| N(1)-H(1A)       | 0.94(3)    |
|                  |            |
| C(6)-C(1)-C(2)   | 121.3(3)   |
| C(6)-C(1)-H(1)   | 119.4      |
| C(2)-C(1)-H(1)   | 119.4      |
| C(3)-C(2)-C(1)   | 122.4(3)   |
| C(3)-C(2)-H(2)   | 118.8      |
| C(1)-C(2)-H(2)   | 118.8      |
| C(2)-C(3)-C(4)   | 116.3(3)   |
| C(2)-C(3)-C(37)  | 122.4(3)   |
| C(4)-C(3)-C(37)  | 121.2(3)   |
| C(3)-C(4)-C(5)   | 122.0(3)   |
| C(3)-C(4)-H(4)   | 119.0      |
| C(5)-C(4)-H(4)   | 119.0      |
| C(6)-C(5)-C(4)   | 120.9(3)   |
| C(6)-C(5)-H(5)   | 119.6      |
| C(4)-C(5)-H(5)   | 119.6      |
| C(1)-C(6)-C(5)   | 117.1(3)   |
| C(1)-C(6)-N(1)   | 119.1(3)   |
| C(5)-C(6)-N(1)   | 123.8(2)   |
| N(1)-C(7)-C(8)   | 111.8(2)   |
| N(1)-C(7)-C(19)  | 116.8(2)   |
| C(8)-C(7)-C(19)  | 100.6(2)   |
| N(1)-C(7)-C(27)  | 111.1(2)   |
| C(8)-C(7)-C(27)  | 107.98(19) |
| C(19)-C(7)-C(27) | 107.7(2)   |
| C(13)-C(8)-C(9)  | 121.8(3)   |
| C(13)-C(8)-C(7)  | 110.5(2)   |
| C(9)-C(8)-C(7)   | 127.7(3)   |
| C(10)-C(9)-C(8)  | 118.0(3)   |

|                   |          |
|-------------------|----------|
| C(10)-C(9)-H(9)   | 121.0    |
| C(8)-C(9)-H(9)    | 121.0    |
| C(11)-C(10)-C(9)  | 120.9(3) |
| C(11)-C(10)-H(10) | 119.6    |
| C(9)-C(10)-H(10)  | 119.6    |
| C(10)-C(11)-C(12) | 121.7(3) |
| C(10)-C(11)-H(11) | 119.2    |
| C(12)-C(11)-H(11) | 119.2    |
| C(11)-C(12)-C(13) | 117.6(3) |
| C(11)-C(12)-H(12) | 121.2    |
| C(13)-C(12)-H(12) | 121.2    |
| C(8)-C(13)-C(12)  | 119.9(3) |
| C(8)-C(13)-C(14)  | 109.0(2) |
| C(12)-C(13)-C(14) | 130.9(3) |
| C(15)-C(14)-C(19) | 120.1(3) |
| C(15)-C(14)-C(13) | 131.0(3) |
| C(19)-C(14)-C(13) | 108.9(2) |
| C(16)-C(15)-C(14) | 119.1(3) |
| C(16)-C(15)-H(15) | 120.5    |
| C(14)-C(15)-H(15) | 120.5    |
| C(15)-C(16)-C(17) | 121.0(3) |
| C(15)-C(16)-H(16) | 119.5    |
| C(17)-C(16)-H(16) | 119.5    |
| C(16)-C(17)-C(18) | 120.8(3) |
| C(16)-C(17)-H(17) | 119.6    |
| C(18)-C(17)-H(17) | 119.6    |
| C(19)-C(18)-C(17) | 118.3(3) |
| C(19)-C(18)-H(18) | 120.8    |
| C(17)-C(18)-H(18) | 120.8    |
| C(18)-C(19)-C(14) | 120.7(3) |
| C(18)-C(19)-C(7)  | 129.5(2) |
| C(14)-C(19)-C(7)  | 109.8(2) |
| C(21)-C(20)-C(25) | 120.7(3) |
| C(21)-C(20)-H(20) | 119.6    |
| C(25)-C(20)-H(20) | 119.6    |
| C(22)-C(21)-C(20) | 120.1(3) |
| C(22)-C(21)-H(21) | 120.0    |
| C(20)-C(21)-H(21) | 120.0    |

|                   |          |
|-------------------|----------|
| C(21)-C(22)-C(23) | 119.9(3) |
| C(21)-C(22)-H(22) | 120.1    |
| C(23)-C(22)-H(22) | 120.1    |
| C(24)-C(23)-C(22) | 120.8(3) |
| C(24)-C(23)-H(23) | 119.6    |
| C(22)-C(23)-H(23) | 119.6    |
| C(23)-C(24)-C(25) | 119.6(3) |
| C(23)-C(24)-H(24) | 120.2    |
| C(25)-C(24)-H(24) | 120.2    |
| C(20)-C(25)-C(24) | 119.0(3) |
| C(20)-C(25)-C(26) | 122.4(2) |
| C(24)-C(25)-C(26) | 118.6(3) |
| O(1)-C(26)-C(25)  | 121.7(3) |
| O(1)-C(26)-C(27)  | 119.4(3) |
| C(25)-C(26)-C(27) | 118.9(2) |
| C(28)-C(27)-C(26) | 114.8(2) |
| C(28)-C(27)-C(7)  | 130.2(2) |
| C(26)-C(27)-C(7)  | 115.0(2) |
| C(27)-C(28)-C(29) | 127.5(3) |
| C(27)-C(28)-C(36) | 127.3(3) |
| C(29)-C(28)-C(36) | 105.1(2) |
| C(30)-C(29)-C(34) | 117.7(3) |
| C(30)-C(29)-C(28) | 135.7(3) |
| C(34)-C(29)-C(28) | 106.6(3) |
| C(29)-C(30)-C(31) | 120.6(3) |
| C(29)-C(30)-H(30) | 119.7    |
| C(31)-C(30)-H(30) | 119.7    |
| C(32)-C(31)-C(30) | 120.5(4) |
| C(32)-C(31)-H(31) | 119.7    |
| C(30)-C(31)-H(31) | 119.7    |
| C(33)-C(32)-C(31) | 120.4(4) |
| C(33)-C(32)-H(32) | 119.8    |
| C(31)-C(32)-H(32) | 119.8    |
| C(32)-C(33)-C(34) | 119.1(4) |
| C(32)-C(33)-H(33) | 120.5    |
| C(34)-C(33)-H(33) | 120.5    |
| C(33)-C(34)-N(2)  | 128.3(3) |
| C(33)-C(34)-C(29) | 121.7(4) |

|                     |          |
|---------------------|----------|
| N(2)-C(34)-C(29)    | 110.0(3) |
| N(2)-C(35)-H(35A)   | 109.5    |
| N(2)-C(35)-H(35B)   | 109.5    |
| H(35A)-C(35)-H(35B) | 109.5    |
| N(2)-C(35)-H(35C)   | 109.5    |
| H(35A)-C(35)-H(35C) | 109.5    |
| H(35B)-C(35)-H(35C) | 109.5    |
| O(2)-C(36)-N(2)     | 123.3(3) |
| O(2)-C(36)-C(28)    | 130.1(3) |
| N(2)-C(36)-C(28)    | 106.6(3) |
| C(3)-C(37)-H(37A)   | 109.5    |
| C(3)-C(37)-H(37B)   | 109.5    |
| H(37A)-C(37)-H(37B) | 109.5    |
| C(3)-C(37)-H(37C)   | 109.5    |
| H(37A)-C(37)-H(37C) | 109.5    |
| H(37B)-C(37)-H(37C) | 109.5    |
| C(6)-N(1)-C(7)      | 119.1(2) |
| C(6)-N(1)-H(1A)     | 109(2)   |
| C(7)-N(1)-H(1A)     | 109(2)   |
| C(36)-N(2)-C(34)    | 111.6(3) |
| C(36)-N(2)-C(35)    | 122.4(3) |
| C(34)-N(2)-C(35)    | 125.9(3) |

---

Symmetry transformations used to generate equivalent atoms:

Table 4. Anisotropic displacement parameters ( $\text{\AA}^2 \times 10^3$ ) for AM. The anisotropic displacement factor exponent takes the form:  $-2\pi^2 [ h^2 a^{*2} U^{11} + \dots + 2 h k a^* b^* U^{12} ]$

|      | $U^{11}$ | $U^{22}$ | $U^{33}$ | $U^{23}$ | $U^{13}$ | $U^{12}$ |
|------|----------|----------|----------|----------|----------|----------|
| C(1) | 60(2)    | 103(2)   | 81(2)    | -1(2)    | 11(2)    | -2(2)    |
| C(2) | 57(2)    | 114(3)   | 93(3)    | -2(2)    | 5(2)     | -15(2)   |
| C(3) | 72(2)    | 79(2)    | 76(2)    | 11(2)    | -5(2)    | -12(2)   |
| C(4) | 70(2)    | 76(2)    | 96(2)    | -10(2)   | 5(2)     | -5(2)    |
| C(5) | 58(2)    | 78(2)    | 91(2)    | -10(2)   | 4(2)     | -3(1)    |
| C(6) | 60(1)    | 65(2)    | 55(2)    | 13(1)    | 6(1)     | -1(1)    |
| C(7) | 50(1)    | 58(1)    | 50(1)    | 6(1)     | 5(1)     | 7(1)     |
| C(8) | 51(1)    | 58(1)    | 57(2)    | -7(1)    | 0(1)     | 4(1)     |

|       |        |        |        |        |        |        |
|-------|--------|--------|--------|--------|--------|--------|
| C(9)  | 66(2)  | 64(2)  | 70(2)  | -9(1)  | -12(1) | 14(1)  |
| C(10) | 72(2)  | 71(2)  | 96(3)  | -26(2) | -20(2) | 18(2)  |
| C(11) | 52(2)  | 82(2)  | 120(3) | -36(2) | -1(2)  | 15(2)  |
| C(12) | 60(2)  | 77(2)  | 97(2)  | -28(2) | 23(2)  | -5(1)  |
| C(13) | 55(1)  | 59(2)  | 67(2)  | -12(1) | 8(1)   | -2(1)  |
| C(14) | 70(2)  | 57(2)  | 53(2)  | -4(1)  | 13(1)  | -4(1)  |
| C(15) | 105(2) | 68(2)  | 63(2)  | 0(1)   | 28(2)  | -5(2)  |
| C(16) | 139(3) | 76(2)  | 59(2)  | 17(2)  | 20(2)  | 20(2)  |
| C(17) | 109(3) | 82(2)  | 66(2)  | 13(2)  | -2(2)  | 30(2)  |
| C(18) | 71(2)  | 76(2)  | 60(2)  | 10(1)  | 0(1)   | 17(1)  |
| C(19) | 56(1)  | 59(2)  | 51(1)  | 2(1)   | 4(1)   | 2(1)   |
| C(20) | 63(2)  | 58(2)  | 68(2)  | 2(1)   | 6(1)   | 7(1)   |
| C(21) | 84(2)  | 67(2)  | 87(2)  | 11(2)  | 12(2)  | 4(2)   |
| C(22) | 89(2)  | 79(2)  | 114(3) | 14(2)  | 24(2)  | -5(2)  |
| C(23) | 67(2)  | 97(3)  | 150(4) | 13(3)  | 6(2)   | -13(2) |
| C(24) | 64(2)  | 78(2)  | 104(3) | 5(2)   | -6(2)  | 1(2)   |
| C(25) | 61(2)  | 56(2)  | 65(2)  | -6(1)  | 4(1)   | 7(1)   |
| C(26) | 61(2)  | 56(1)  | 54(2)  | -5(1)  | -1(1)  | 14(1)  |
| C(27) | 60(1)  | 61(2)  | 49(1)  | 8(1)   | 4(1)   | 15(1)  |
| C(28) | 66(2)  | 67(2)  | 52(2)  | 6(1)   | 9(1)   | 16(1)  |
| C(29) | 80(2)  | 70(2)  | 57(2)  | 7(1)   | 17(1)  | 24(2)  |
| C(30) | 95(2)  | 84(2)  | 72(2)  | -14(2) | 16(2)  | 14(2)  |
| C(31) | 134(3) | 89(3)  | 84(3)  | -22(2) | 24(2)  | 6(2)   |
| C(32) | 150(4) | 92(3)  | 94(3)  | -23(2) | 36(3)  | 22(3)  |
| C(33) | 128(3) | 94(3)  | 90(3)  | -3(2)  | 39(2)  | 45(2)  |
| C(34) | 98(2)  | 83(2)  | 58(2)  | 8(2)   | 23(2)  | 31(2)  |
| C(35) | 86(2)  | 153(4) | 102(3) | 7(3)   | 33(2)  | 47(2)  |
| C(36) | 72(2)  | 78(2)  | 59(2)  | 13(1)  | 15(1)  | 22(2)  |
| C(37) | 93(3)  | 108(3) | 101(3) | -8(2)  | -7(2)  | -26(2) |
| N(1)  | 63(1)  | 68(1)  | 58(1)  | 6(1)   | 11(1)  | 0(1)   |
| N(2)  | 76(2)  | 98(2)  | 73(2)  | 10(2)  | 24(1)  | 35(2)  |
| O(1)  | 72(1)  | 71(1)  | 61(1)  | 3(1)   | -6(1)  | 17(1)  |
| O(2)  | 62(1)  | 102(2) | 85(2)  | 0(1)   | 14(1)  | 17(1)  |

---



Table 5. Hydrogen coordinates ( $\times 10^4$ ) and isotropic displacement parameters ( $\text{\AA}^2 \times 10^{-3}$ ) for AM.

|        | x        | y        | z        | U(eq)   |
|--------|----------|----------|----------|---------|
| H(1)   | 3430     | 4830     | 3928     | 97      |
| H(2)   | 2535     | 3663     | 3092     | 107     |
| H(4)   | 5492     | 2897     | 2478     | 97      |
| H(5)   | 6415     | 4040     | 3337     | 92      |
| H(9)   | 7819     | 4600     | 4920     | 82      |
| H(10)  | 9576     | 4024     | 4679     | 100     |
| H(11)  | 10330    | 4636     | 3681     | 104     |
| H(12)  | 9303     | 5743     | 2824     | 92      |
| H(15)  | 7673     | 6897     | 1989     | 93      |
| H(16)  | 6034     | 7688     | 1431     | 109     |
| H(17)  | 4436     | 7719     | 2002     | 105     |
| H(18)  | 4478     | 7041     | 3196     | 84      |
| H(20)  | 6896     | 8447     | 3751     | 76      |
| H(21)  | 7706     | 9739     | 3130     | 95      |
| H(22)  | 9601     | 10137    | 3452     | 112     |
| H(23)  | 10690    | 9245     | 4400     | 127     |
| H(24)  | 9901     | 7944     | 5026     | 101     |
| H(30)  | 7750     | 8520     | 5851     | 100     |
| H(31)  | 7628     | 9916     | 6631     | 122     |
| H(32)  | 5886     | 10605    | 6772     | 132     |
| H(33)  | 4237     | 9889     | 6150     | 122     |
| H(35A) | 2495     | 7967     | 4835     | 167     |
| H(35B) | 2758     | 9121     | 5072     | 167     |
| H(35C) | 2718     | 8265     | 5681     | 167     |
| H(37A) | 3052     | 1810     | 2373     | 155     |
| H(37B) | 3832     | 2175     | 1797     | 155     |
| H(37C) | 2669     | 2735     | 1834     | 155     |
| H(1A)  | 4970(30) | 5650(30) | 4465(19) | 109(13) |

Table 6. Torsion angles [°] for AM.

|                         |           |
|-------------------------|-----------|
| C(6)-C(1)-C(2)-C(3)     | -0.4(5)   |
| C(1)-C(2)-C(3)-C(4)     | 0.6(5)    |
| C(1)-C(2)-C(3)-C(37)    | -178.5(3) |
| C(2)-C(3)-C(4)-C(5)     | 0.3(5)    |
| C(37)-C(3)-C(4)-C(5)    | 179.4(3)  |
| C(3)-C(4)-C(5)-C(6)     | -1.3(5)   |
| C(2)-C(1)-C(6)-C(5)     | -0.6(5)   |
| C(2)-C(1)-C(6)-N(1)     | -178.0(3) |
| C(4)-C(5)-C(6)-C(1)     | 1.4(5)    |
| C(4)-C(5)-C(6)-N(1)     | 178.6(3)  |
| N(1)-C(7)-C(8)-C(13)    | 135.0(2)  |
| C(19)-C(7)-C(8)-C(13)   | 10.3(3)   |
| C(27)-C(7)-C(8)-C(13)   | -102.5(2) |
| N(1)-C(7)-C(8)-C(9)     | -44.9(4)  |
| C(19)-C(7)-C(8)-C(9)    | -169.7(3) |
| C(27)-C(7)-C(8)-C(9)    | 77.6(3)   |
| C(13)-C(8)-C(9)-C(10)   | 2.3(4)    |
| C(7)-C(8)-C(9)-C(10)    | -177.8(3) |
| C(8)-C(9)-C(10)-C(11)   | 0.8(4)    |
| C(9)-C(10)-C(11)-C(12)  | -2.9(5)   |
| C(10)-C(11)-C(12)-C(13) | 1.8(4)    |
| C(9)-C(8)-C(13)-C(12)   | -3.3(4)   |
| C(7)-C(8)-C(13)-C(12)   | 176.7(2)  |
| C(9)-C(8)-C(13)-C(14)   | 172.6(2)  |
| C(7)-C(8)-C(13)-C(14)   | -7.3(3)   |
| C(11)-C(12)-C(13)-C(8)  | 1.2(4)    |
| C(11)-C(12)-C(13)-C(14) | -173.7(3) |
| C(8)-C(13)-C(14)-C(15)  | -175.9(3) |
| C(12)-C(13)-C(14)-C(15) | -0.5(5)   |
| C(8)-C(13)-C(14)-C(19)  | 0.7(3)    |
| C(12)-C(13)-C(14)-C(19) | 176.0(3)  |
| C(19)-C(14)-C(15)-C(16) | -2.0(4)   |
| C(13)-C(14)-C(15)-C(16) | 174.3(3)  |
| C(14)-C(15)-C(16)-C(17) | -0.3(5)   |
| C(15)-C(16)-C(17)-C(18) | 2.2(6)    |
| C(16)-C(17)-C(18)-C(19) | -1.9(5)   |

|                         |           |
|-------------------------|-----------|
| C(17)-C(18)-C(19)-C(14) | -0.4(4)   |
| C(17)-C(18)-C(19)-C(7)  | 178.6(3)  |
| C(15)-C(14)-C(19)-C(18) | 2.3(4)    |
| C(13)-C(14)-C(19)-C(18) | -174.7(2) |
| C(15)-C(14)-C(19)-C(7)  | -176.8(2) |
| C(13)-C(14)-C(19)-C(7)  | 6.2(3)    |
| N(1)-C(7)-C(19)-C(18)   | 49.9(4)   |
| C(8)-C(7)-C(19)-C(18)   | 171.2(3)  |
| C(27)-C(7)-C(19)-C(18)  | -75.9(3)  |
| N(1)-C(7)-C(19)-C(14)   | -131.0(2) |
| C(8)-C(7)-C(19)-C(14)   | -9.8(3)   |
| C(27)-C(7)-C(19)-C(14)  | 103.2(2)  |
| C(25)-C(20)-C(21)-C(22) | -0.3(5)   |
| C(20)-C(21)-C(22)-C(23) | -0.1(5)   |
| C(21)-C(22)-C(23)-C(24) | 0.3(6)    |
| C(22)-C(23)-C(24)-C(25) | -0.1(6)   |
| C(21)-C(20)-C(25)-C(24) | 0.5(4)    |
| C(21)-C(20)-C(25)-C(26) | 178.6(3)  |
| C(23)-C(24)-C(25)-C(20) | -0.3(5)   |
| C(23)-C(24)-C(25)-C(26) | -178.6(3) |
| C(20)-C(25)-C(26)-O(1)  | -173.6(2) |
| C(24)-C(25)-C(26)-O(1)  | 4.6(4)    |
| C(20)-C(25)-C(26)-C(27) | 4.1(4)    |
| C(24)-C(25)-C(26)-C(27) | -177.8(3) |
| O(1)-C(26)-C(27)-C(28)  | 89.3(3)   |
| C(25)-C(26)-C(27)-C(28) | -88.4(3)  |
| O(1)-C(26)-C(27)-C(7)   | -91.8(3)  |
| C(25)-C(26)-C(27)-C(7)  | 90.5(3)   |
| N(1)-C(7)-C(27)-C(28)   | -45.4(3)  |
| C(8)-C(7)-C(27)-C(28)   | -168.4(3) |
| C(19)-C(7)-C(27)-C(28)  | 83.7(3)   |
| N(1)-C(7)-C(27)-C(26)   | 135.9(2)  |
| C(8)-C(7)-C(27)-C(26)   | 12.9(3)   |
| C(19)-C(7)-C(27)-C(26)  | -95.0(2)  |
| C(26)-C(27)-C(28)-C(29) | 1.3(4)    |
| C(7)-C(27)-C(28)-C(29)  | -177.4(2) |
| C(26)-C(27)-C(28)-C(36) | 175.6(2)  |
| C(7)-C(27)-C(28)-C(36)  | -3.1(5)   |

|                         |           |
|-------------------------|-----------|
| C(27)-C(28)-C(29)-C(30) | -9.5(5)   |
| C(36)-C(28)-C(29)-C(30) | 175.2(3)  |
| C(27)-C(28)-C(29)-C(34) | 173.6(3)  |
| C(36)-C(28)-C(29)-C(34) | -1.7(3)   |
| C(34)-C(29)-C(30)-C(31) | -2.7(5)   |
| C(28)-C(29)-C(30)-C(31) | -179.4(3) |
| C(29)-C(30)-C(31)-C(32) | 0.6(6)    |
| C(30)-C(31)-C(32)-C(33) | 0.9(7)    |
| C(31)-C(32)-C(33)-C(34) | -0.1(6)   |
| C(32)-C(33)-C(34)-N(2)  | 178.8(4)  |
| C(32)-C(33)-C(34)-C(29) | -2.1(6)   |
| C(30)-C(29)-C(34)-C(33) | 3.5(5)    |
| C(28)-C(29)-C(34)-C(33) | -178.9(3) |
| C(30)-C(29)-C(34)-N(2)  | -177.2(3) |
| C(28)-C(29)-C(34)-N(2)  | 0.3(3)    |
| C(27)-C(28)-C(36)-O(2)  | 5.9(5)    |
| C(29)-C(28)-C(36)-O(2)  | -178.7(3) |
| C(27)-C(28)-C(36)-N(2)  | -172.8(3) |
| C(29)-C(28)-C(36)-N(2)  | 2.5(3)    |
| C(1)-C(6)-N(1)-C(7)     | -132.8(3) |
| C(5)-C(6)-N(1)-C(7)     | 49.9(4)   |
| C(8)-C(7)-N(1)-C(6)     | -75.5(3)  |
| C(19)-C(7)-N(1)-C(6)    | 39.7(3)   |
| C(27)-C(7)-N(1)-C(6)    | 163.8(2)  |
| O(2)-C(36)-N(2)-C(34)   | 178.7(3)  |
| C(28)-C(36)-N(2)-C(34)  | -2.4(3)   |
| O(2)-C(36)-N(2)-C(35)   | 0.6(5)    |
| C(28)-C(36)-N(2)-C(35)  | 179.5(3)  |
| C(33)-C(34)-N(2)-C(36)  | -179.4(3) |
| C(29)-C(34)-N(2)-C(36)  | 1.4(4)    |
| C(33)-C(34)-N(2)-C(35)  | -1.4(6)   |
| C(29)-C(34)-N(2)-C(35)  | 179.4(3)  |

---

Symmetry transformations used to generate equivalent atoms:

Table 7. Hydrogen bonds for AM [ $\text{\AA}$  and  $^\circ$ ].

| D-H...A           | d(D-H)  | d(H...A) | d(D...A) | $\angle(\text{DHA})$ |
|-------------------|---------|----------|----------|----------------------|
| N(1)-H(1A)...O(2) | 0.94(3) | 1.96(4)  | 2.810(3) | 151(3)               |

Symmetry transformations used to generate equivalent atoms:

Table 1. Crystal data and structure refinement for **4b**

|                                         |                                                                                          |                                                                               |
|-----------------------------------------|------------------------------------------------------------------------------------------|-------------------------------------------------------------------------------|
| Identification code                     | <b>4b</b>                                                                                |                                                                               |
| Empirical formula                       | C <sub>36</sub> H <sub>25</sub> N O <sub>3</sub>                                         |                                                                               |
| Formula weight                          | 519.57                                                                                   |                                                                               |
| Temperature                             | 296(2) K                                                                                 |                                                                               |
| Wavelength                              | 0.71073 $\text{\AA}$                                                                     |                                                                               |
| Crystal system                          | Monoclinic                                                                               |                                                                               |
| Space group                             | P2 <sub>1</sub> /n                                                                       |                                                                               |
| Unit cell dimensions                    | a = 9.7530(5) $\text{\AA}$<br>b = 19.4993(9) $\text{\AA}$<br>c = 14.0108(7) $\text{\AA}$ | $\alpha = 90^\circ$ .<br>$\beta = 94.635(2)^\circ$ .<br>$\gamma = 90^\circ$ . |
| Volume                                  | 2655.8(2) $\text{\AA}^3$                                                                 |                                                                               |
| Z                                       | 4                                                                                        |                                                                               |
| Density (calculated)                    | 1.299 Mg/m <sup>3</sup>                                                                  |                                                                               |
| Absorption coefficient                  | 0.082 mm <sup>-1</sup>                                                                   |                                                                               |
| F(000)                                  | 1088                                                                                     |                                                                               |
| Crystal size                            | 0.150 x 0.150 x 0.100 mm <sup>3</sup>                                                    |                                                                               |
| Theta range for data collection         | 3.457 to 26.000 $^\circ$ .                                                               |                                                                               |
| Index ranges                            | -12 $\leq$ h $\leq$ 12, -24 $\leq$ k $\leq$ 24, -17 $\leq$ l $\leq$ 17                   |                                                                               |
| Reflections collected                   | 61272                                                                                    |                                                                               |
| Independent reflections                 | 5187 [R(int) = 0.0607]                                                                   |                                                                               |
| Completeness to theta = 25.242 $^\circ$ | 99.7 %                                                                                   |                                                                               |
| Absorption correction                   | Semi-empirical from equivalents                                                          |                                                                               |
| Max. and min. transmission              | 0.7458 and 0.6751                                                                        |                                                                               |
| Refinement method                       | Full-matrix least-squares on F <sup>2</sup>                                              |                                                                               |
| Data / restraints / parameters          | 5187 / 0 / 366                                                                           |                                                                               |
| Goodness-of-fit on F <sup>2</sup>       | 1.095                                                                                    |                                                                               |
| Final R indices [I > 2 $\sigma$ (I)]    | R1 = 0.0481, wR2 = 0.1017                                                                |                                                                               |
| R indices (all data)                    | R1 = 0.0675, wR2 = 0.1121                                                                |                                                                               |
| Extinction coefficient                  | 0.0263(14)                                                                               |                                                                               |
| Largest diff. peak and hole             | 0.199 and -0.165 e. $\text{\AA}^{-3}$                                                    |                                                                               |

Table 2. Atomic coordinates ( $\times 10^4$ ) and equivalent isotropic displacement parameters ( $\text{\AA}^2 \times 10^3$ ) for 242. U(eq) is defined as one third of the trace of the orthogonalized  $U^{ij}$  tensor.

|       | x       | y       | z       | U(eq) |
|-------|---------|---------|---------|-------|
| C(1)  | 9293(2) | 6391(1) | 1604(1) | 39(1) |
| C(2)  | 9980(2) | 5941(1) | 1045(1) | 49(1) |
| C(3)  | 9895(2) | 6044(1) | 60(2)   | 59(1) |
| C(4)  | 9139(2) | 6583(1) | -346(2) | 63(1) |
| C(5)  | 8465(2) | 7037(1) | 208(1)  | 56(1) |
| C(6)  | 8550(2) | 6941(1) | 1195(1) | 42(1) |
| C(7)  | 7977(2) | 7337(1) | 1955(1) | 42(1) |
| C(8)  | 7170(2) | 7926(1) | 1920(2) | 57(1) |
| C(9)  | 6805(2) | 8206(1) | 2765(2) | 65(1) |
| C(10) | 7226(2) | 7912(1) | 3633(2) | 58(1) |
| C(11) | 8010(2) | 7319(1) | 3679(1) | 48(1) |
| C(12) | 8385(2) | 7034(1) | 2837(1) | 38(1) |
| C(13) | 9200(2) | 6374(1) | 2683(1) | 36(1) |
| C(14) | 8319(2) | 5762(1) | 2984(1) | 33(1) |
| C(15) | 7448(2) | 5448(1) | 2152(1) | 35(1) |
| C(16) | 6128(2) | 5789(1) | 1829(1) | 36(1) |
| C(17) | 5445(2) | 6200(1) | 2442(1) | 46(1) |
| C(18) | 4200(2) | 6495(1) | 2140(2) | 58(1) |
| C(19) | 3651(2) | 6395(1) | 1220(2) | 70(1) |
| C(20) | 4331(3) | 5995(1) | 600(2)  | 79(1) |
| C(21) | 5561(2) | 5688(1) | 903(1)  | 59(1) |
| C(22) | 8231(2) | 5503(1) | 3868(1) | 32(1) |
| C(23) | 7321(2) | 4953(1) | 4169(1) | 33(1) |
| C(24) | 6393(2) | 4513(1) | 3683(1) | 42(1) |
| C(25) | 5678(2) | 4046(1) | 4198(1) | 49(1) |
| C(26) | 5888(2) | 4010(1) | 5178(1) | 50(1) |
| C(27) | 6808(2) | 4443(1) | 5685(1) | 45(1) |
| C(28) | 7505(2) | 4906(1) | 5170(1) | 35(1) |
| C(29) | 8992(2) | 5750(1) | 4788(1) | 35(1) |
| C(30) | 8957(2) | 5492(1) | 6525(1) | 41(1) |
| C(31) | 7952(2) | 5903(1) | 7056(1) | 38(1) |
| C(32) | 7778(2) | 6600(1) | 6890(1) | 47(1) |
| C(33) | 6846(2) | 6972(1) | 7378(2) | 56(1) |

|       |          |         |         |       |
|-------|----------|---------|---------|-------|
| C(34) | 6079(2)  | 6653(1) | 8025(2) | 61(1) |
| C(35) | 6244(2)  | 5964(1) | 8199(1) | 59(1) |
| C(36) | 7176(2)  | 5591(1) | 7717(1) | 48(1) |
| N(1)  | 8503(1)  | 5388(1) | 5515(1) | 37(1) |
| O(1)  | 9880(1)  | 6197(1) | 4905(1) | 46(1) |
| O(2)  | 7858(1)  | 4942(1) | 1758(1) | 49(1) |
| O(3)  | 10559(1) | 6363(1) | 3127(1) | 44(1) |

Table 3. Bond lengths [ $\text{\AA}$ ] and angles [ $^\circ$ ] for 242.

|             |            |
|-------------|------------|
| C(1)-C(2)   | 1.385(2)   |
| C(1)-C(6)   | 1.392(2)   |
| C(1)-C(13)  | 1.522(2)   |
| C(2)-C(3)   | 1.389(3)   |
| C(2)-H(2)   | 0.9300     |
| C(3)-C(4)   | 1.380(3)   |
| C(3)-H(3)   | 0.9300     |
| C(4)-C(5)   | 1.380(3)   |
| C(4)-H(4)   | 0.9300     |
| C(5)-C(6)   | 1.391(3)   |
| C(5)-H(5)   | 0.9300     |
| C(6)-C(7)   | 1.462(3)   |
| C(7)-C(8)   | 1.391(3)   |
| C(7)-C(12)  | 1.398(2)   |
| C(8)-C(9)   | 1.376(3)   |
| C(8)-H(8)   | 0.9300     |
| C(9)-C(10)  | 1.376(3)   |
| C(9)-H(9)   | 0.9300     |
| C(10)-C(11) | 1.386(3)   |
| C(10)-H(10) | 0.9300     |
| C(11)-C(12) | 1.380(2)   |
| C(11)-H(11) | 0.9300     |
| C(12)-C(13) | 1.536(2)   |
| C(13)-O(3)  | 1.4177(19) |
| C(13)-C(14) | 1.549(2)   |
| C(14)-C(22) | 1.348(2)   |
| C(14)-C(15) | 1.515(2)   |
| C(15)-O(2)  | 1.2143(19) |

|              |            |
|--------------|------------|
| C(15)-C(16)  | 1.487(2)   |
| C(16)-C(21)  | 1.383(2)   |
| C(16)-C(17)  | 1.383(2)   |
| C(17)-C(18)  | 1.379(3)   |
| C(17)-H(17)  | 0.9300     |
| C(18)-C(19)  | 1.369(3)   |
| C(18)-H(18)  | 0.9300     |
| C(19)-C(20)  | 1.377(3)   |
| C(19)-H(19)  | 0.9300     |
| C(20)-C(21)  | 1.376(3)   |
| C(20)-H(20)  | 0.9300     |
| C(21)-H(21)  | 0.9300     |
| C(22)-C(23)  | 1.475(2)   |
| C(22)-C(29)  | 1.513(2)   |
| C(23)-C(24)  | 1.385(2)   |
| C(23)-C(28)  | 1.402(2)   |
| C(24)-C(25)  | 1.385(2)   |
| C(24)-H(24)  | 0.9300     |
| C(25)-C(26)  | 1.373(3)   |
| C(25)-H(25)  | 0.9300     |
| C(26)-C(27)  | 1.386(3)   |
| C(26)-H(26)  | 0.9300     |
| C(27)-C(28)  | 1.369(2)   |
| C(27)-H(27)  | 0.9300     |
| C(28)-N(1)   | 1.410(2)   |
| C(29)-O(1)   | 1.2304(19) |
| C(29)-N(1)   | 1.357(2)   |
| C(30)-N(1)   | 1.463(2)   |
| C(30)-C(31)  | 1.507(2)   |
| C(30)-H(30A) | 0.9700     |
| C(30)-H(30B) | 0.9700     |
| C(31)-C(36)  | 1.383(2)   |
| C(31)-C(32)  | 1.387(2)   |
| C(32)-C(33)  | 1.386(3)   |
| C(32)-H(32)  | 0.9300     |
| C(33)-C(34)  | 1.371(3)   |
| C(33)-H(33)  | 0.9300     |
| C(34)-C(35)  | 1.372(3)   |



|                   |            |
|-------------------|------------|
| C(34)-H(34)       | 0.9300     |
| C(35)-C(36)       | 1.382(3)   |
| C(35)-H(35)       | 0.9300     |
| C(36)-H(36)       | 0.9300     |
| O(3)-H(3A)        | 0.96(3)    |
|                   |            |
| C(2)-C(1)-C(6)    | 120.93(16) |
| C(2)-C(1)-C(13)   | 128.30(16) |
| C(6)-C(1)-C(13)   | 110.77(15) |
| C(1)-C(2)-C(3)    | 118.59(19) |
| C(1)-C(2)-H(2)    | 120.7      |
| C(3)-C(2)-H(2)    | 120.7      |
| C(4)-C(3)-C(2)    | 120.4(2)   |
| C(4)-C(3)-H(3)    | 119.8      |
| C(2)-C(3)-H(3)    | 119.8      |
| C(3)-C(4)-C(5)    | 121.36(19) |
| C(3)-C(4)-H(4)    | 119.3      |
| C(5)-C(4)-H(4)    | 119.3      |
| C(4)-C(5)-C(6)    | 118.7(2)   |
| C(4)-C(5)-H(5)    | 120.7      |
| C(6)-C(5)-H(5)    | 120.7      |
| C(5)-C(6)-C(1)    | 120.05(18) |
| C(5)-C(6)-C(7)    | 131.09(18) |
| C(1)-C(6)-C(7)    | 108.86(15) |
| C(8)-C(7)-C(12)   | 119.96(18) |
| C(8)-C(7)-C(6)    | 131.20(18) |
| C(12)-C(7)-C(6)   | 108.84(15) |
| C(9)-C(8)-C(7)    | 118.84(19) |
| C(9)-C(8)-H(8)    | 120.6      |
| C(7)-C(8)-H(8)    | 120.6      |
| C(8)-C(9)-C(10)   | 121.01(19) |
| C(8)-C(9)-H(9)    | 119.5      |
| C(10)-C(9)-H(9)   | 119.5      |
| C(9)-C(10)-C(11)  | 120.91(19) |
| C(9)-C(10)-H(10)  | 119.5      |
| C(11)-C(10)-H(10) | 119.5      |
| C(12)-C(11)-C(10) | 118.63(18) |
| C(12)-C(11)-H(11) | 120.7      |

|                   |            |
|-------------------|------------|
| C(10)-C(11)-H(11) | 120.7      |
| C(11)-C(12)-C(7)  | 120.63(16) |
| C(11)-C(12)-C(13) | 129.27(16) |
| C(7)-C(12)-C(13)  | 110.06(15) |
| O(3)-C(13)-C(1)   | 107.92(13) |
| O(3)-C(13)-C(12)  | 115.32(13) |
| C(1)-C(13)-C(12)  | 101.24(13) |
| O(3)-C(13)-C(14)  | 112.83(13) |
| C(1)-C(13)-C(14)  | 111.40(13) |
| C(12)-C(13)-C(14) | 107.58(12) |
| C(22)-C(14)-C(15) | 118.84(14) |
| C(22)-C(14)-C(13) | 128.11(14) |
| C(15)-C(14)-C(13) | 113.03(13) |
| O(2)-C(15)-C(16)  | 122.32(15) |
| O(2)-C(15)-C(14)  | 119.58(15) |
| C(16)-C(15)-C(14) | 118.07(14) |
| C(21)-C(16)-C(17) | 119.25(17) |
| C(21)-C(16)-C(15) | 119.50(16) |
| C(17)-C(16)-C(15) | 121.25(15) |
| C(18)-C(17)-C(16) | 120.51(18) |
| C(18)-C(17)-H(17) | 119.7      |
| C(16)-C(17)-H(17) | 119.7      |
| C(19)-C(18)-C(17) | 119.8(2)   |
| C(19)-C(18)-H(18) | 120.1      |
| C(17)-C(18)-H(18) | 120.1      |
| C(18)-C(19)-C(20) | 120.2(2)   |
| C(18)-C(19)-H(19) | 119.9      |
| C(20)-C(19)-H(19) | 119.9      |
| C(19)-C(20)-C(21) | 120.2(2)   |
| C(19)-C(20)-H(20) | 119.9      |
| C(21)-C(20)-H(20) | 119.9      |
| C(20)-C(21)-C(16) | 120.0(2)   |
| C(20)-C(21)-H(21) | 120.0      |
| C(16)-C(21)-H(21) | 120.0      |
| C(14)-C(22)-C(23) | 128.30(14) |
| C(14)-C(22)-C(29) | 126.87(15) |
| C(23)-C(22)-C(29) | 104.72(13) |
| C(24)-C(23)-C(28) | 118.46(15) |

|                     |            |
|---------------------|------------|
| C(24)-C(23)-C(22)   | 134.00(15) |
| C(28)-C(23)-C(22)   | 107.54(13) |
| C(25)-C(24)-C(23)   | 119.25(16) |
| C(25)-C(24)-H(24)   | 120.4      |
| C(23)-C(24)-H(24)   | 120.4      |
| C(26)-C(25)-C(24)   | 120.88(17) |
| C(26)-C(25)-H(25)   | 119.6      |
| C(24)-C(25)-H(25)   | 119.6      |
| C(25)-C(26)-C(27)   | 121.28(17) |
| C(25)-C(26)-H(26)   | 119.4      |
| C(27)-C(26)-H(26)   | 119.4      |
| C(28)-C(27)-C(26)   | 117.40(16) |
| C(28)-C(27)-H(27)   | 121.3      |
| C(26)-C(27)-H(27)   | 121.3      |
| C(27)-C(28)-C(23)   | 122.73(16) |
| C(27)-C(28)-N(1)    | 128.09(15) |
| C(23)-C(28)-N(1)    | 109.18(14) |
| O(1)-C(29)-N(1)     | 123.73(15) |
| O(1)-C(29)-C(22)    | 129.12(15) |
| N(1)-C(29)-C(22)    | 107.15(13) |
| N(1)-C(30)-C(31)    | 113.13(13) |
| N(1)-C(30)-H(30A)   | 109.0      |
| C(31)-C(30)-H(30A)  | 109.0      |
| N(1)-C(30)-H(30B)   | 109.0      |
| C(31)-C(30)-H(30B)  | 109.0      |
| H(30A)-C(30)-H(30B) | 107.8      |
| C(36)-C(31)-C(32)   | 118.44(16) |
| C(36)-C(31)-C(30)   | 120.65(16) |
| C(32)-C(31)-C(30)   | 120.91(16) |
| C(33)-C(32)-C(31)   | 120.50(18) |
| C(33)-C(32)-H(32)   | 119.8      |
| C(31)-C(32)-H(32)   | 119.8      |
| C(34)-C(33)-C(32)   | 120.19(19) |
| C(34)-C(33)-H(33)   | 119.9      |
| C(32)-C(33)-H(33)   | 119.9      |
| C(33)-C(34)-C(35)   | 119.95(19) |
| C(33)-C(34)-H(34)   | 120.0      |
| C(35)-C(34)-H(34)   | 120.0      |

|                   |            |
|-------------------|------------|
| C(34)-C(35)-C(36) | 120.1(2)   |
| C(34)-C(35)-H(35) | 120.0      |
| C(36)-C(35)-H(35) | 120.0      |
| C(35)-C(36)-C(31) | 120.85(19) |
| C(35)-C(36)-H(36) | 119.6      |
| C(31)-C(36)-H(36) | 119.6      |
| C(29)-N(1)-C(28)  | 111.38(13) |
| C(29)-N(1)-C(30)  | 123.82(14) |
| C(28)-N(1)-C(30)  | 124.80(14) |
| C(13)-O(3)-H(3A)  | 105.8(15)  |

---

Symmetry transformations used to generate equivalent atoms:

Table 4. Anisotropic displacement parameters ( $\text{\AA}^2 \times 10^3$ ) for 242. The anisotropic displacement factor exponent takes the form:  $-2\pi^2 [ h^2 a^{*2} U^{11} + \dots + 2 h k a^* b^* U^{12} ]$

|       | $U^{11}$ | $U^{22}$ | $U^{33}$ | $U^{23}$ | $U^{13}$ | $U^{12}$ |
|-------|----------|----------|----------|----------|----------|----------|
| C(1)  | 38(1)    | 42(1)    | 38(1)    | 2(1)     | 6(1)     | -6(1)    |
| C(2)  | 48(1)    | 56(1)    | 45(1)    | 0(1)     | 12(1)    | -3(1)    |
| C(3)  | 58(1)    | 74(1)    | 48(1)    | -9(1)    | 19(1)    | -13(1)   |
| C(4)  | 64(1)    | 90(2)    | 37(1)    | 4(1)     | 6(1)     | -20(1)   |
| C(5)  | 57(1)    | 67(1)    | 44(1)    | 15(1)    | 0(1)     | -9(1)    |
| C(6)  | 40(1)    | 46(1)    | 41(1)    | 7(1)     | 2(1)     | -10(1)   |
| C(7)  | 40(1)    | 37(1)    | 49(1)    | 6(1)     | 1(1)     | -5(1)    |
| C(8)  | 60(1)    | 43(1)    | 68(1)    | 13(1)    | -3(1)    | 3(1)     |
| C(9)  | 64(1)    | 42(1)    | 86(2)    | -1(1)    | 2(1)     | 14(1)    |
| C(10) | 58(1)    | 49(1)    | 67(1)    | -14(1)   | 6(1)     | 10(1)    |
| C(11) | 51(1)    | 44(1)    | 47(1)    | -3(1)    | 2(1)     | 4(1)     |
| C(12) | 36(1)    | 35(1)    | 44(1)    | 0(1)     | 3(1)     | -4(1)    |
| C(13) | 33(1)    | 38(1)    | 37(1)    | 2(1)     | 2(1)     | 0(1)     |
| C(14) | 31(1)    | 34(1)    | 34(1)    | -1(1)    | 4(1)     | 6(1)     |
| C(15) | 41(1)    | 34(1)    | 31(1)    | 1(1)     | 7(1)     | -4(1)    |
| C(16) | 37(1)    | 39(1)    | 33(1)    | 3(1)     | 2(1)     | -6(1)    |
| C(17) | 41(1)    | 58(1)    | 39(1)    | 2(1)     | 2(1)     | 4(1)     |
| C(18) | 45(1)    | 70(1)    | 58(1)    | 5(1)     | 6(1)     | 14(1)    |
| C(19) | 49(1)    | 89(2)    | 69(2)    | 10(1)    | -13(1)   | 13(1)    |
| C(20) | 75(2)    | 104(2)   | 53(1)    | -5(1)    | -28(1)   | 15(1)    |

|       |       |       |       |        |       |        |
|-------|-------|-------|-------|--------|-------|--------|
| C(21) | 63(1) | 71(1) | 41(1) | -9(1)  | -9(1) | 6(1)   |
| C(22) | 31(1) | 33(1) | 32(1) | -1(1)  | 3(1)  | 5(1)   |
| C(23) | 32(1) | 33(1) | 34(1) | -1(1)  | 5(1)  | 5(1)   |
| C(24) | 44(1) | 46(1) | 37(1) | -2(1)  | 3(1)  | -7(1)  |
| C(25) | 49(1) | 51(1) | 48(1) | -4(1)  | 7(1)  | -13(1) |
| C(26) | 55(1) | 47(1) | 51(1) | 1(1)   | 19(1) | -10(1) |
| C(27) | 55(1) | 48(1) | 34(1) | 2(1)   | 11(1) | -1(1)  |
| C(28) | 36(1) | 35(1) | 34(1) | -1(1)  | 6(1)  | 5(1)   |
| C(29) | 32(1) | 36(1) | 36(1) | -2(1)  | 2(1)  | 5(1)   |
| C(30) | 43(1) | 48(1) | 31(1) | -2(1)  | -2(1) | 8(1)   |
| C(31) | 38(1) | 45(1) | 29(1) | -4(1)  | -2(1) | 2(1)   |
| C(32) | 46(1) | 44(1) | 50(1) | -2(1)  | 2(1)  | -2(1)  |
| C(33) | 52(1) | 45(1) | 71(1) | -12(1) | -3(1) | 6(1)   |
| C(34) | 48(1) | 73(2) | 62(1) | -23(1) | 6(1)  | 11(1)  |
| C(35) | 56(1) | 78(2) | 44(1) | -4(1)  | 14(1) | -1(1)  |
| C(36) | 58(1) | 48(1) | 37(1) | -1(1)  | 4(1)  | 3(1)   |
| N(1)  | 42(1) | 41(1) | 29(1) | -3(1)  | 2(1)  | 1(1)   |
| O(1)  | 44(1) | 50(1) | 42(1) | -2(1)  | -3(1) | -9(1)  |
| O(2)  | 60(1) | 42(1) | 46(1) | -10(1) | 8(1)  | 3(1)   |
| O(3)  | 33(1) | 54(1) | 46(1) | 4(1)   | 1(1)  | -2(1)  |

Table 5. Hydrogen coordinates ( $\times 10^4$ ) and isotropic displacement parameters ( $\text{\AA}^2 \times 10^{-3}$ ) for 242.

|       | x     | y    | z     | U(eq) |
|-------|-------|------|-------|-------|
| H(2)  | 10488 | 5579 | 1322  | 59    |
| H(3)  | 10349 | 5747 | -327  | 71    |
| H(4)  | 9083  | 6641 | -1007 | 76    |
| H(5)  | 7963  | 7401 | -72   | 68    |
| H(8)  | 6882  | 8127 | 1337  | 69    |
| H(9)  | 6265  | 8599 | 2750  | 78    |
| H(10) | 6982  | 8115 | 4195  | 70    |
| H(11) | 8279  | 7116 | 4266  | 57    |
| H(17) | 5828  | 6277 | 3062  | 55    |
| H(18) | 3735  | 6762 | 2560  | 70    |
| H(19) | 2816  | 6598 | 1014  | 84    |

|        |           |          |          |       |
|--------|-----------|----------|----------|-------|
| H(20)  | 3957      | 5932     | -26      | 95    |
| H(21)  | 6010      | 5413     | 485      | 71    |
| H(24)  | 6252      | 4531     | 3020     | 51    |
| H(25)  | 5047      | 3752     | 3876     | 59    |
| H(26)  | 5403      | 3689     | 5507     | 60    |
| H(27)  | 6947      | 4421     | 6348     | 55    |
| H(30A) | 9837      | 5727     | 6570     | 49    |
| H(30B) | 9091      | 5049     | 6832     | 49    |
| H(32)  | 8291      | 6819     | 6449     | 56    |
| H(33)  | 6740      | 7440     | 7265     | 68    |
| H(34)  | 5448      | 6904     | 8347     | 73    |
| H(35)  | 5728      | 5748     | 8641     | 70    |
| H(36)  | 7282      | 5125     | 7839     | 58    |
| H(3A)  | 10470(30) | 6370(12) | 3802(19) | 85(8) |

Table 6. Torsion angles [°] for 242.

|                        |             |
|------------------------|-------------|
| C(6)-C(1)-C(2)-C(3)    | -1.1(3)     |
| C(13)-C(1)-C(2)-C(3)   | 178.21(17)  |
| C(1)-C(2)-C(3)-C(4)    | 0.0(3)      |
| C(2)-C(3)-C(4)-C(5)    | 0.8(3)      |
| C(3)-C(4)-C(5)-C(6)    | -0.4(3)     |
| C(4)-C(5)-C(6)-C(1)    | -0.7(3)     |
| C(4)-C(5)-C(6)-C(7)    | 178.86(18)  |
| C(2)-C(1)-C(6)-C(5)    | 1.5(3)      |
| C(13)-C(1)-C(6)-C(5)   | -177.97(15) |
| C(2)-C(1)-C(6)-C(7)    | -178.17(15) |
| C(13)-C(1)-C(6)-C(7)   | 2.41(19)    |
| C(5)-C(6)-C(7)-C(8)    | 0.3(3)      |
| C(1)-C(6)-C(7)-C(8)    | 179.88(18)  |
| C(5)-C(6)-C(7)-C(12)   | -178.74(18) |
| C(1)-C(6)-C(7)-C(12)   | 0.83(19)    |
| C(12)-C(7)-C(8)-C(9)   | 1.0(3)      |
| C(6)-C(7)-C(8)-C(9)    | -177.98(19) |
| C(7)-C(8)-C(9)-C(10)   | 0.0(3)      |
| C(8)-C(9)-C(10)-C(11)  | -1.2(3)     |
| C(9)-C(10)-C(11)-C(12) | 1.3(3)      |
| C(10)-C(11)-C(12)-C(7) | -0.2(3)     |

|                         |             |
|-------------------------|-------------|
| C(10)-C(11)-C(12)-C(13) | -177.82(17) |
| C(8)-C(7)-C(12)-C(11)   | -0.9(3)     |
| C(6)-C(7)-C(12)-C(11)   | 178.30(16)  |
| C(8)-C(7)-C(12)-C(13)   | 177.13(15)  |
| C(6)-C(7)-C(12)-C(13)   | -3.70(18)   |
| C(2)-C(1)-C(13)-O(3)    | 54.8(2)     |
| C(6)-C(1)-C(13)-O(3)    | -125.81(15) |
| C(2)-C(1)-C(13)-C(12)   | 176.32(17)  |
| C(6)-C(1)-C(13)-C(12)   | -4.31(17)   |
| C(2)-C(1)-C(13)-C(14)   | -69.6(2)    |
| C(6)-C(1)-C(13)-C(14)   | 109.81(15)  |
| C(11)-C(12)-C(13)-O(3)  | -61.2(2)    |
| C(7)-C(12)-C(13)-O(3)   | 120.98(16)  |
| C(11)-C(12)-C(13)-C(1)  | -177.42(17) |
| C(7)-C(12)-C(13)-C(1)   | 4.80(17)    |
| C(11)-C(12)-C(13)-C(14) | 65.6(2)     |
| C(7)-C(12)-C(13)-C(14)  | -112.15(15) |
| O(3)-C(13)-C(14)-C(22)  | 44.0(2)     |
| C(1)-C(13)-C(14)-C(22)  | 165.52(15)  |
| C(12)-C(13)-C(14)-C(22) | -84.37(19)  |
| O(3)-C(13)-C(14)-C(15)  | -137.48(14) |
| C(1)-C(13)-C(14)-C(15)  | -15.91(18)  |
| C(12)-C(13)-C(14)-C(15) | 94.20(15)   |
| C(22)-C(14)-C(15)-O(2)  | -84.13(19)  |
| C(13)-C(14)-C(15)-O(2)  | 97.16(17)   |
| C(22)-C(14)-C(15)-C(16) | 97.64(17)   |
| C(13)-C(14)-C(15)-C(16) | -81.07(17)  |
| O(2)-C(15)-C(16)-C(21)  | -21.6(2)    |
| C(14)-C(15)-C(16)-C(21) | 156.58(16)  |
| O(2)-C(15)-C(16)-C(17)  | 157.52(17)  |
| C(14)-C(15)-C(16)-C(17) | -24.3(2)    |
| C(21)-C(16)-C(17)-C(18) | 1.2(3)      |
| C(15)-C(16)-C(17)-C(18) | -177.94(17) |
| C(16)-C(17)-C(18)-C(19) | -1.5(3)     |
| C(17)-C(18)-C(19)-C(20) | 0.7(4)      |
| C(18)-C(19)-C(20)-C(21) | 0.6(4)      |
| C(19)-C(20)-C(21)-C(16) | -0.9(4)     |
| C(17)-C(16)-C(21)-C(20) | 0.1(3)      |

|                         |             |
|-------------------------|-------------|
| C(15)-C(16)-C(21)-C(20) | 179.2(2)    |
| C(15)-C(14)-C(22)-C(23) | -3.3(2)     |
| C(13)-C(14)-C(22)-C(23) | 175.18(14)  |
| C(15)-C(14)-C(22)-C(29) | -179.01(14) |
| C(13)-C(14)-C(22)-C(29) | -0.5(3)     |
| C(14)-C(22)-C(23)-C(24) | 5.3(3)      |
| C(29)-C(22)-C(23)-C(24) | -178.22(17) |
| C(14)-C(22)-C(23)-C(28) | -174.45(15) |
| C(29)-C(22)-C(23)-C(28) | 1.99(16)    |
| C(28)-C(23)-C(24)-C(25) | 0.2(2)      |
| C(22)-C(23)-C(24)-C(25) | -179.55(17) |
| C(23)-C(24)-C(25)-C(26) | -0.6(3)     |
| C(24)-C(25)-C(26)-C(27) | 0.7(3)      |
| C(25)-C(26)-C(27)-C(28) | -0.3(3)     |
| C(26)-C(27)-C(28)-C(23) | -0.1(3)     |
| C(26)-C(27)-C(28)-N(1)  | -178.73(16) |
| C(24)-C(23)-C(28)-C(27) | 0.1(2)      |
| C(22)-C(23)-C(28)-C(27) | 179.96(15)  |
| C(24)-C(23)-C(28)-N(1)  | 179.00(14)  |
| C(22)-C(23)-C(28)-N(1)  | -1.17(17)   |
| C(14)-C(22)-C(29)-O(1)  | -4.7(3)     |
| C(23)-C(22)-C(29)-O(1)  | 178.84(16)  |
| C(14)-C(22)-C(29)-N(1)  | 174.36(15)  |
| C(23)-C(22)-C(29)-N(1)  | -2.15(16)   |
| N(1)-C(30)-C(31)-C(36)  | 108.26(18)  |
| N(1)-C(30)-C(31)-C(32)  | -71.5(2)    |
| C(36)-C(31)-C(32)-C(33) | -0.1(3)     |
| C(30)-C(31)-C(32)-C(33) | 179.63(16)  |
| C(31)-C(32)-C(33)-C(34) | -0.4(3)     |
| C(32)-C(33)-C(34)-C(35) | 0.6(3)      |
| C(33)-C(34)-C(35)-C(36) | -0.4(3)     |
| C(34)-C(35)-C(36)-C(31) | -0.1(3)     |
| C(32)-C(31)-C(36)-C(35) | 0.3(3)      |
| C(30)-C(31)-C(36)-C(35) | -179.42(17) |
| O(1)-C(29)-N(1)-C(28)   | -179.39(15) |
| C(22)-C(29)-N(1)-C(28)  | 1.53(17)    |
| O(1)-C(29)-N(1)-C(30)   | 0.9(2)      |
| C(22)-C(29)-N(1)-C(30)  | -178.18(13) |



|                        |            |
|------------------------|------------|
| C(27)-C(28)-N(1)-C(29) | 178.53(16) |
| C(23)-C(28)-N(1)-C(29) | -0.26(18)  |
| C(27)-C(28)-N(1)-C(30) | -1.8(3)    |
| C(23)-C(28)-N(1)-C(30) | 179.45(14) |
| C(31)-C(30)-N(1)-C(29) | 101.89(18) |
| C(31)-C(30)-N(1)-C(28) | -77.8(2)   |

---

Symmetry transformations used to generate equivalent atoms:

Table 7. Hydrogen bonds for 242 [ $\text{\AA}$  and  $^\circ$ ].

| D-H...A           | d(D-H)  | d(H...A) | d(D...A)   | $\angle(\text{DHA})$ |
|-------------------|---------|----------|------------|----------------------|
| O(3)-H(3A)...O(1) | 0.96(3) | 1.72(3)  | 2.6474(18) | 161(2)               |

---

Symmetry transformations used to generate equivalent atoms:
